# Supplementary material for: Disordered development of gut microbiome interferes with the establishment of the gut ecosystem during early childhood with atopic dermatitis
Source: PubMed Central journal article supplement (PMC9067516; doi:10.1080/19490976.2022.2068366), 2022-04-29
Supplement: KGMI_A_2068366_SM0654.pdf [file KGMI_A_2068366_SM0654.pdf]

## Supplementary materials

### Supplementary Figure legends

**Figure S1.** Summary of sampling strategy in this study.

**Figure S2.** Microbiota detected in negative controls for 16S and WMS. For quality control of microbiome analyses, negative controls for the sampling tube, DNA extraction kit, and library preparation were sequenced and compared to the microbiota in fecal samples. (a) NMDS plots compare the microbiota between negative controls and fecal samples based on Bray–Curtis dissimilarity at the phylum and genus levels. (b) The relative abundances of dominant genera were obtained from the 16S dataset. The heatmap shows the difference in relative abundances among negative controls for the sampling tube (Blank tube), DNA extraction kit (Extraction kit), and amplicon library preparation (Library). The proportions of commonly detected genera in negative controls and fecal samples from non-AD were compared. (c) The comparison of relative abundances of dominant genera obtained from WMS. The heatmap shows the difference in relative abundances among fecal samples from non-AD (Samples), DNA extraction kit (Extraction kit), and whole metagenome library preparation (Library). *Propionibacterium* and *Burkholderia* were detected at high levels in the negative controls for WMS.

**Figure S3.** Comparison of the gut microbiota obtained from WMS between clusters determined by DMM modeling in each phenotypic group. The lowest Laplace approximation indicated the

number of clusters was two for the gut microbiota in all groups. Microbiota clusters in (a) non-AD, (b) mild AD, and (c) moderate to severe AD groups. The median age of GMT2 was higher than that of GMT1 in all groups. Differences of dominant genera between GMT1 and GMT2 were similar in all groups.

**Figure S4.** Comparison of taxonomic profiles between WMS and 16S datasets in each phenotypic group at the phylum and genus levels. The concordance of relative abundances between two datasets was determined by the linear regression model and Pearson correlation. (a) Phylum compositions in each phenotypic group were compared between two datasets. (b) Genus compositions in each phenotypic group were compared between two datasets. The correlation (R) values between WMS and 16S were higher at the phylum level than at the genus level.

**Figure S5.** Relative abundances of facultative anaerobes and strict anaerobes along with age and difference of species composition by significant covariates in Envfit model. (a) The relative abundances of facultative anaerobes and strict anaerobes were compared among groups. The relative abundances of facultative anaerobes were significantly different between phenotypic groups after 6 months. (b) Significantly different species between exclusive breastfeeding (EBF) infants and non-exclusive breastfeeding (Non-EBF) infants. Mod-Sev AD: moderate to severe AD. \* $P < 0.05$ , \*\* $P < 0.01$ .

**Figure S6.** Relative abundances of associated species with delayed MAZ score in AD groups and diversity obtained from 16S and functional gene datasets were compared among

phenotypic groups. (a) The relative abundances of associated species with delayed MAZ scores in AD groups were compared to those in non-AD group. The line plot indicated the shift of relative abundance (median value) for each species along with age. (b) Shannon diversity indices obtained from 16S and functional gene features were compared among phenotypic groups in each age. Mod-Sev AD: moderate to severe AD. \* $P < 0.05$ .

**Figure S7.** Network analysis of the top 10 species in each microbiota type (GMT group) for all subjects and AD groups. Positive correlations are marked by blue edges and negative correlations by red edges. Edge thickness denotes FastSpar correlation, ranging from value -0.4 to 0.4. Node sizes were scaled on the eigenvector centrality measure. Only significant correlations with  $P < 0.05$  are shown. The top 5 network hubs determined by the PageRank algorithm are marked in bold with an orange square symbol.

**Figure S8.** Comparison of gene families involved in butyrate metabolism among phenotypic groups according to age. Statistical significance was calculated by the Kruskal–Wallis test and Dunn’s test.  $P$ -value was adjusted by the Benjamini–Hochberg method. MaAsLin2 evaluated the difference in gene families between phenotypic groups after adjustment. Significantly different gene families were selected by the MaAsLin2 result and Dunn’s test. Mod-Sev: moderate to severe AD. \* $q < 0.05$ , \*\* $q < 0.01$ , \*\*\* $q < 0.001$ .

**Figure S9.** Comparison of species corresponding to significantly different gene families involved in butyrate metabolism between non-AD and AD groups. Statistical significance was calculated by the Kruskal–Wallis test and Dunn’s test.  $P$ -value was adjusted by the Benjamini–

Hochberg method. Species with normalized abundance < 1% in each group were summed as others. Mod-Sev: moderate to severe AD. \* $q < 0.05$ , \*\* $q < 0.01$ .

**Figure S10.** Comparison of gene families involved in propionate metabolism among groups according to age. Statistical significance was calculated by the Kruskal–Wallis test and Dunn’s test.  $P$ -value was adjusted by the Benjamini–Hochberg method. MaAsLin2 evaluated the differences in gene families between phenotypic groups after adjustment. Significantly different gene families were selected by the MaAsLin2 result and Dunn’s test. Mod-Sev: moderate to severe AD. \* $q < 0.05$ , \*\* $q < 0.01$ .

### Supplementary tables

**Table S1.** Simulated effect sizes ( $\omega^2$ ) for PERMANOVA power of 80% and 90% with varied sample sizes. The micropower R-package was used to calculate the statistical power of sample sizes based on the weighted UniFrac distance of within-group distance variance with a significance level of 0.05.

**Table S2.** Clinical characteristics of the study subjects.

**Table S3.** Number of samples analyzed for each dataset at each age.

**Table S4.** Comparison of odds ratio (OR) for covariates between GMT1 and GMT2. CI: confidence interval.

**Table S5.** Mean relative abundance of top 20 genera between GMT1 and GMT2 determined by DMM modeling. We used the Benjamini–Hochberg method adjusted  $p$ -value to calculate the  $q$  value (false discovery rate adjusted  $p$ -value).

**Table S6.** Comparison of indicator species for each age among phenotypic groups. Indicator species were selected after prefiltering by  $> 10\%$  of prevalence and  $> 0.01\%$  relative abundance in at least one group.

**Table S7.** Indicator species at each time point were evaluated after adjusting sex, feeding type, AD phenotype, and family history using MaAsLin 2 ( $q < 0.25$ ). The time point of 6 months was used as a reference for the analysis. The analyzed species were selected after prefiltering for  $> 10\%$  of prevalence and  $> 0.01\%$  relative abundance in at least one group.  $P$ -value was adjusted by the Benjamini–Hochberg method to calculate the  $q$  value (false discovery rate adjusted  $p$ -value).

**Table S8.** Correlation between covariates and microbiota variation. The correlations were determined using the EnvFit model based on Bray–Curtis dissimilarity in each dataset.

**Table S9.** Comparison of gene families involved in butyrate metabolism among phenotypic

groups at each age. Significantly different gene families were selected using the Dunn's post-hoc test and MaAsLin2 analysis. *P*-value was adjusted using the Benjamini–Hochberg method to calculate the *q* value (false discovery rate adjusted *p*-value). N: Non-AD, M: Mild AD, MS: Moderate to Severe AD.

**Table S10.** Comparison of gene families involved in propionate metabolism among phenotypic groups at each age. Significantly different gene families were selected using the Dunn's post-hoc test and MaAsLin2 analysis. *P*-value was adjusted using the Benjamini–Hochberg method to calculate the *q* value (false discovery rate adjusted *p*-value). N: Non-AD, M: Mild AD, MS: Moderate to Severe AD.

**Table S11.** Comparison of the shifted KEGG Orthology (KO) according to age among phenotypic groups. Significantly changed categories according to age were selected using MaAsLin2 ( $q < 0.05$ ) and the random forest model (the lowest cross-validation error). KO features of the gut microbiome at 6 months were used as a reference for MaAsLin2 analysis. Kruskal–Wallis and Dunn's post-hoc tests were performed to calculate the significant differences between groups. *P*-value was adjusted using the Benjamini–Hochberg method. N: Non-AD, M: Mild AD, MS: Moderate to Severe AD.

**Table S12.** Primer list for gene expression of mice colon.

Fig. S1

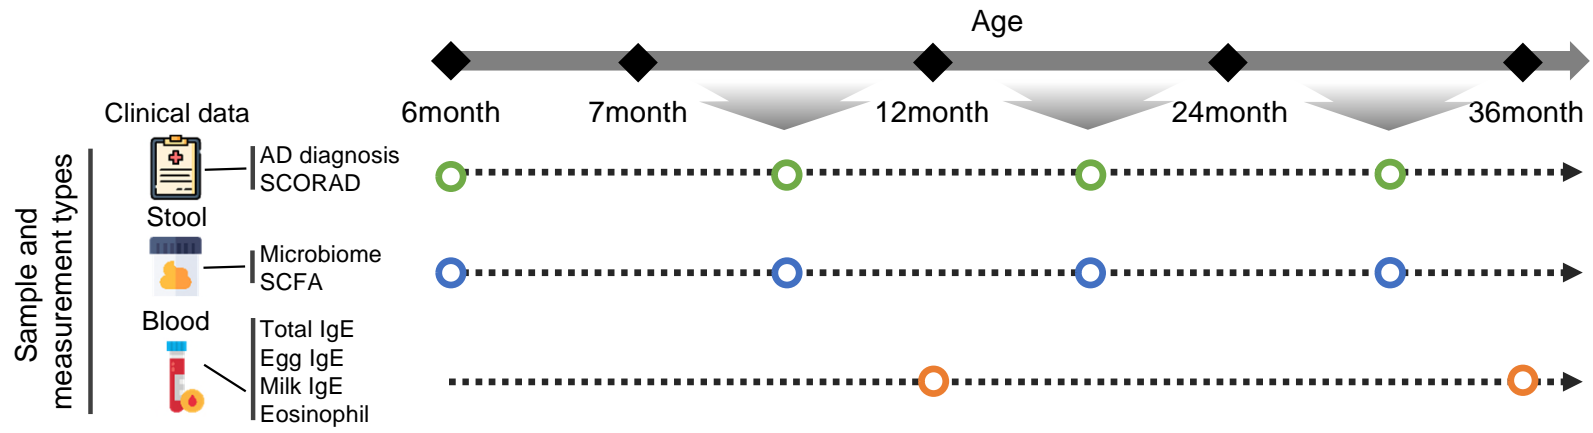

**Fig. S2**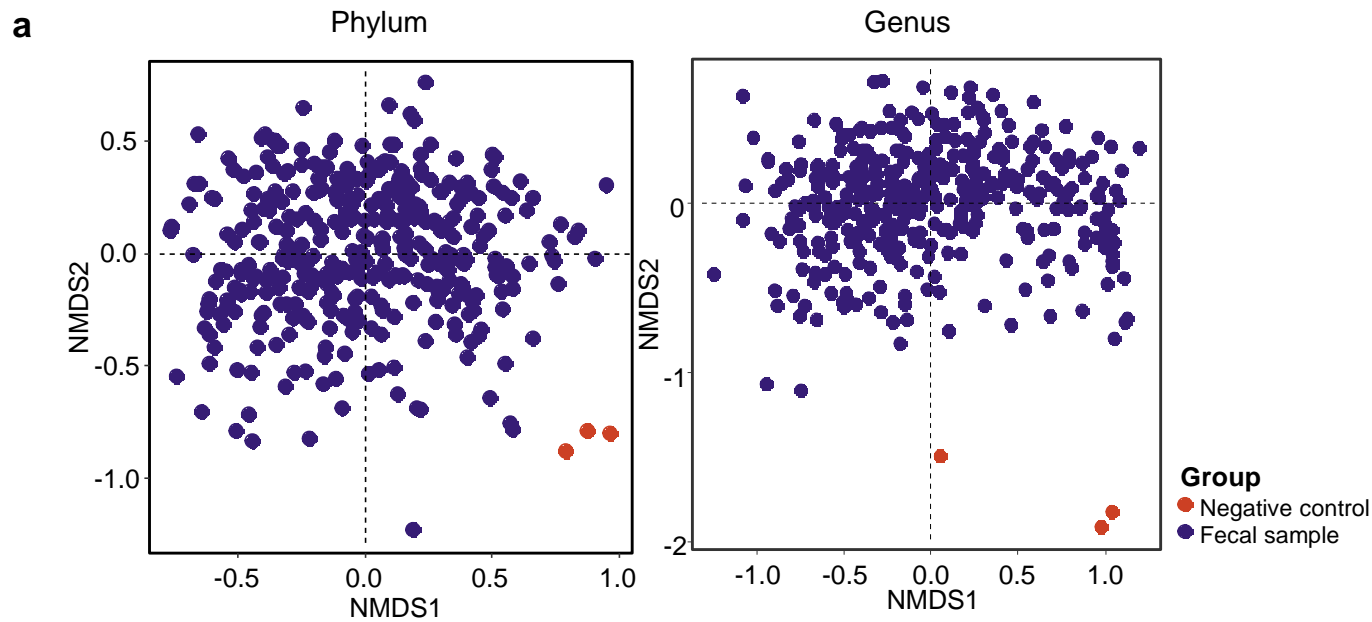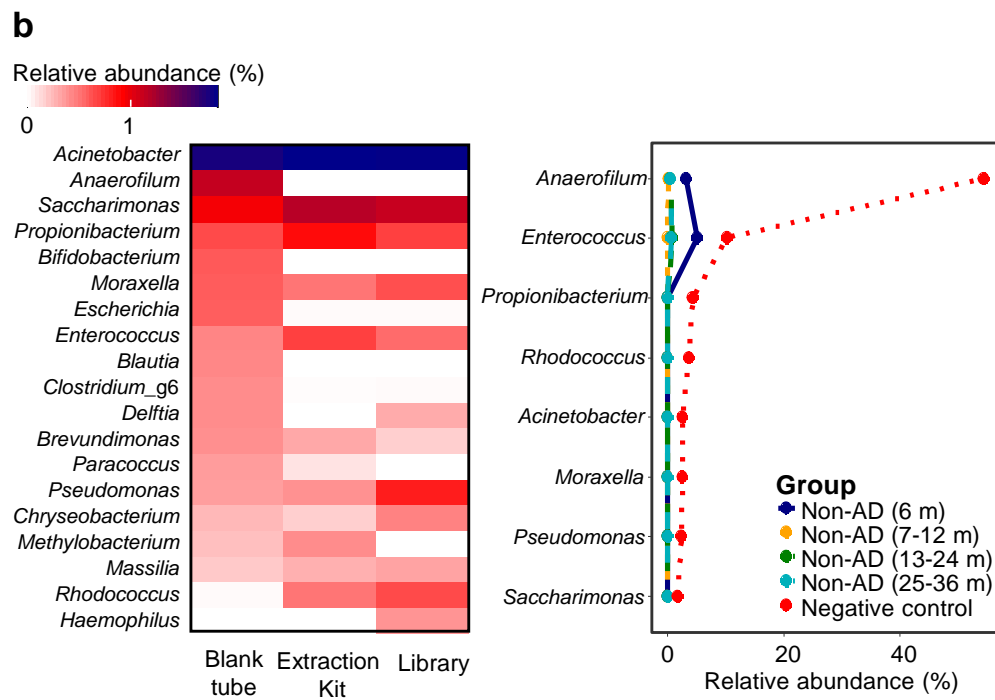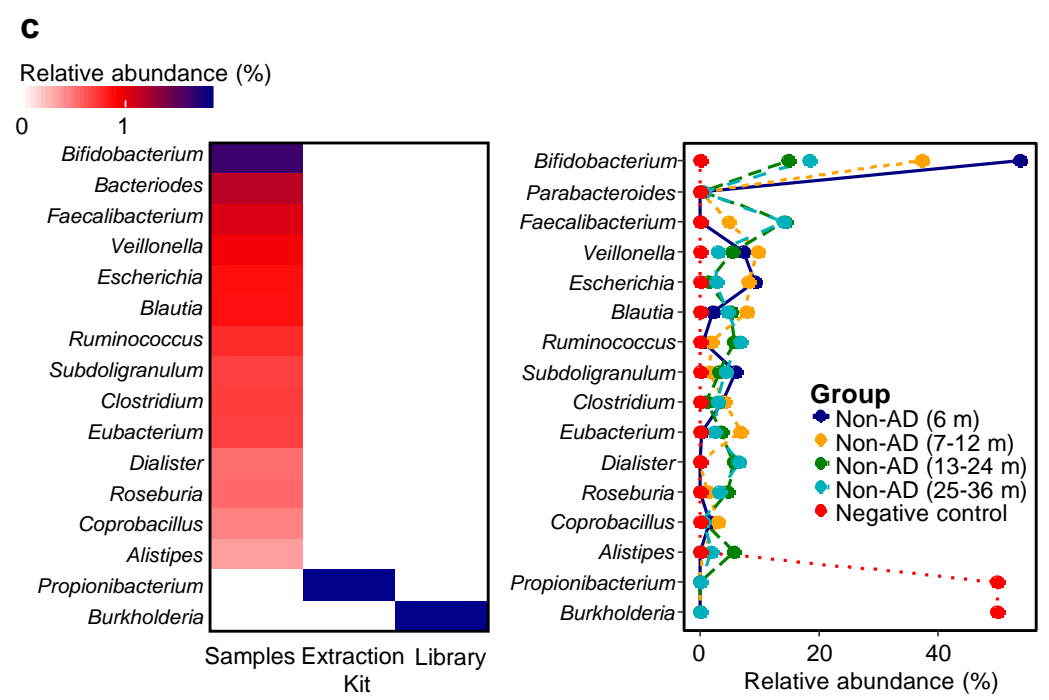



**Fig. S3****a**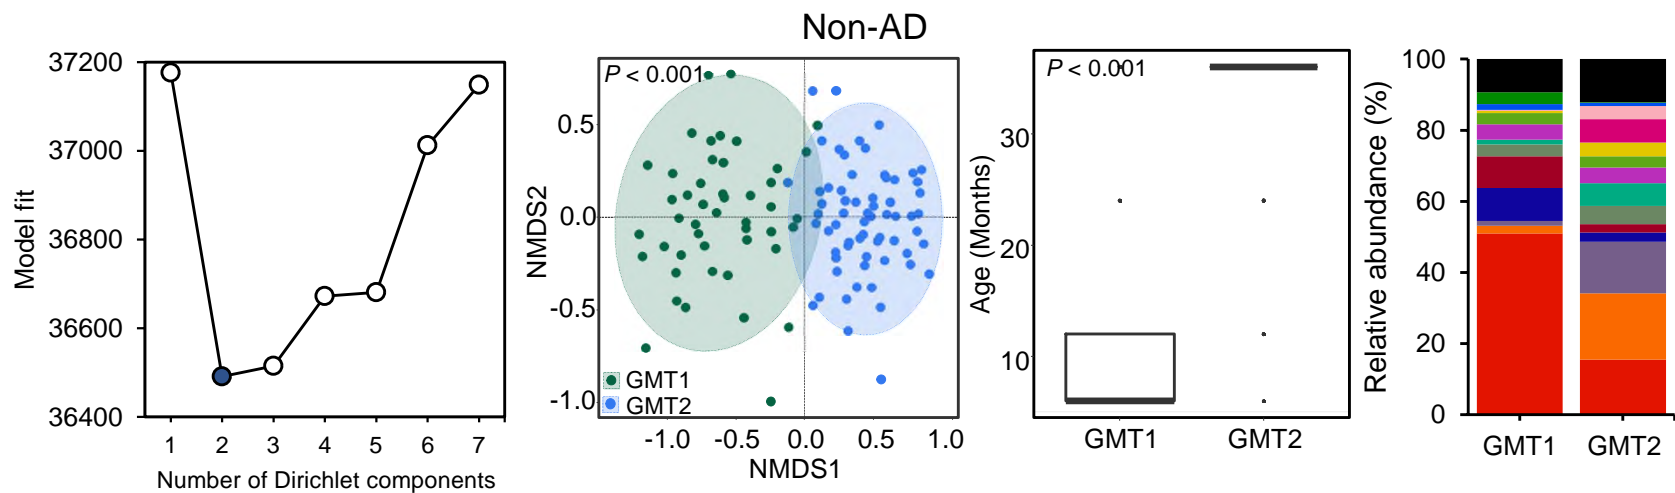**b**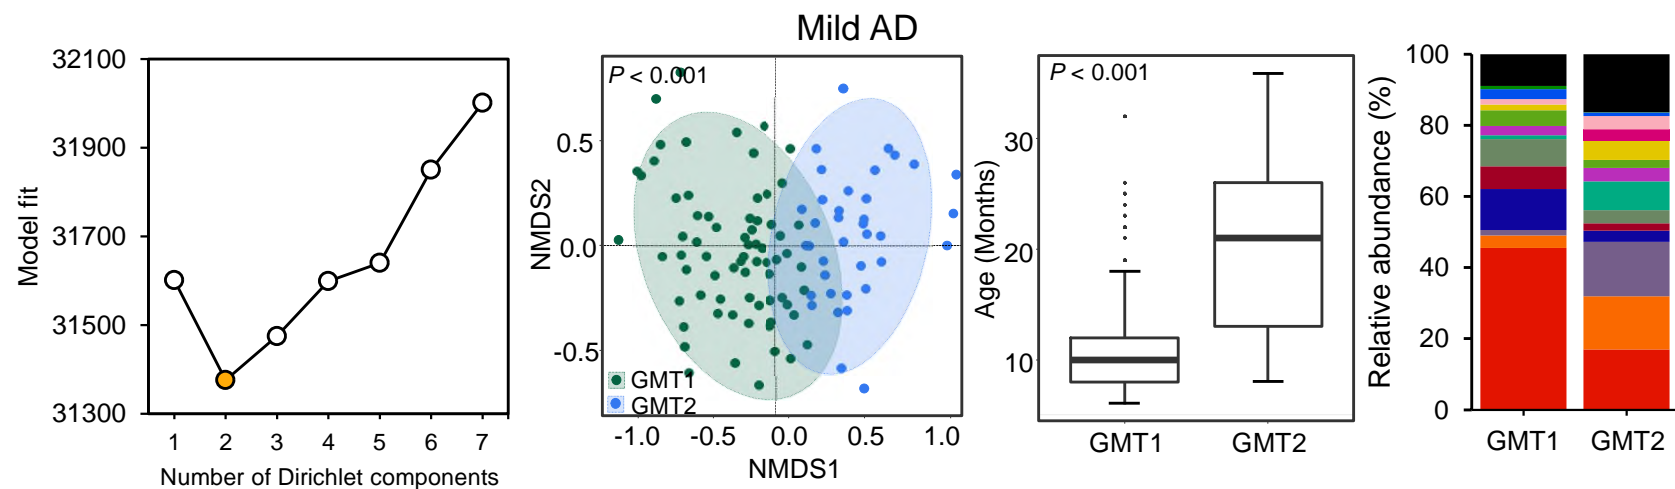**c**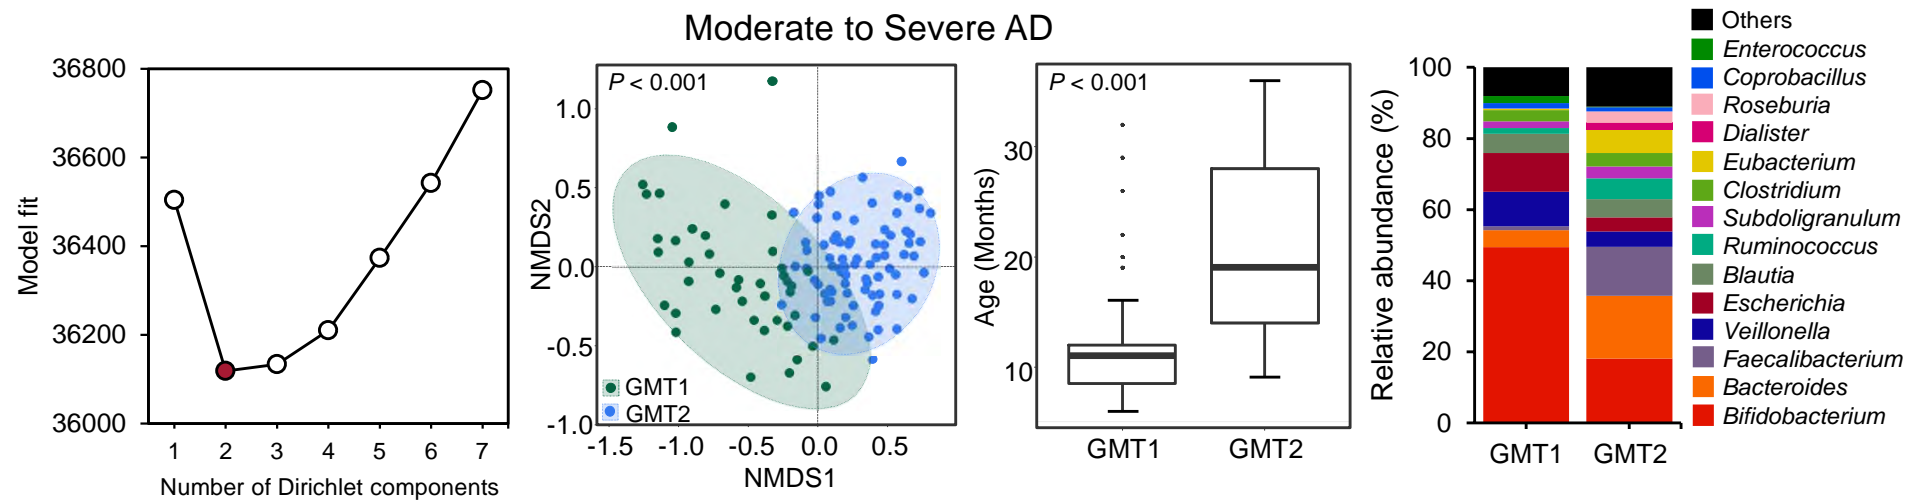

**Fig. S4**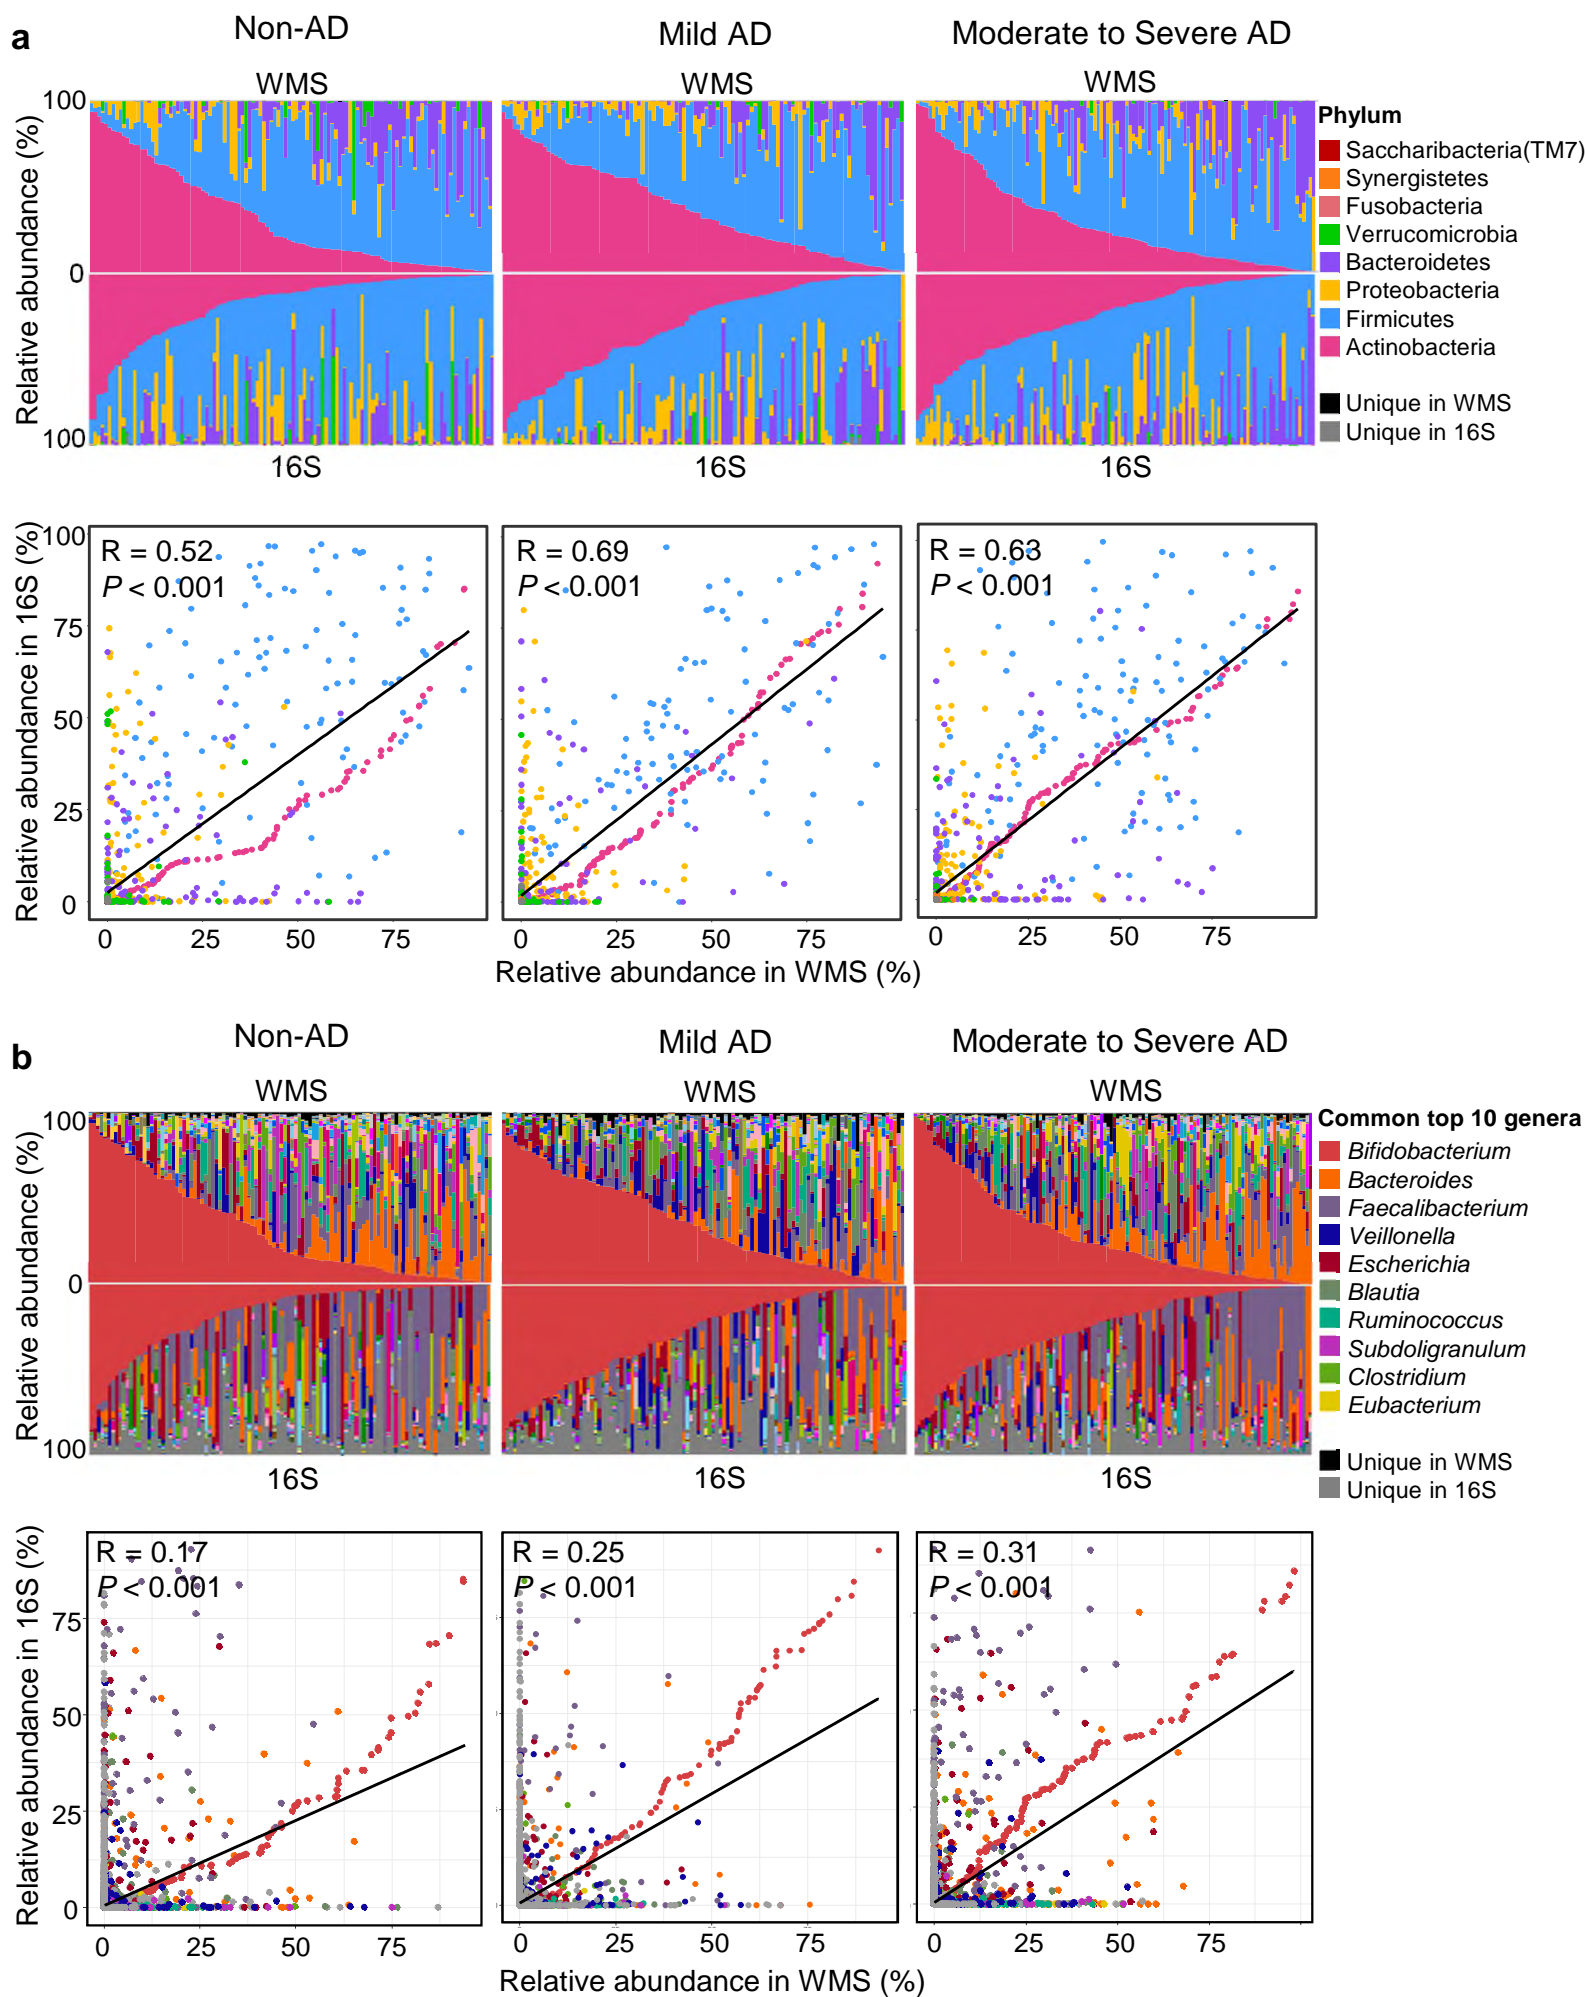

Fig. S5

a

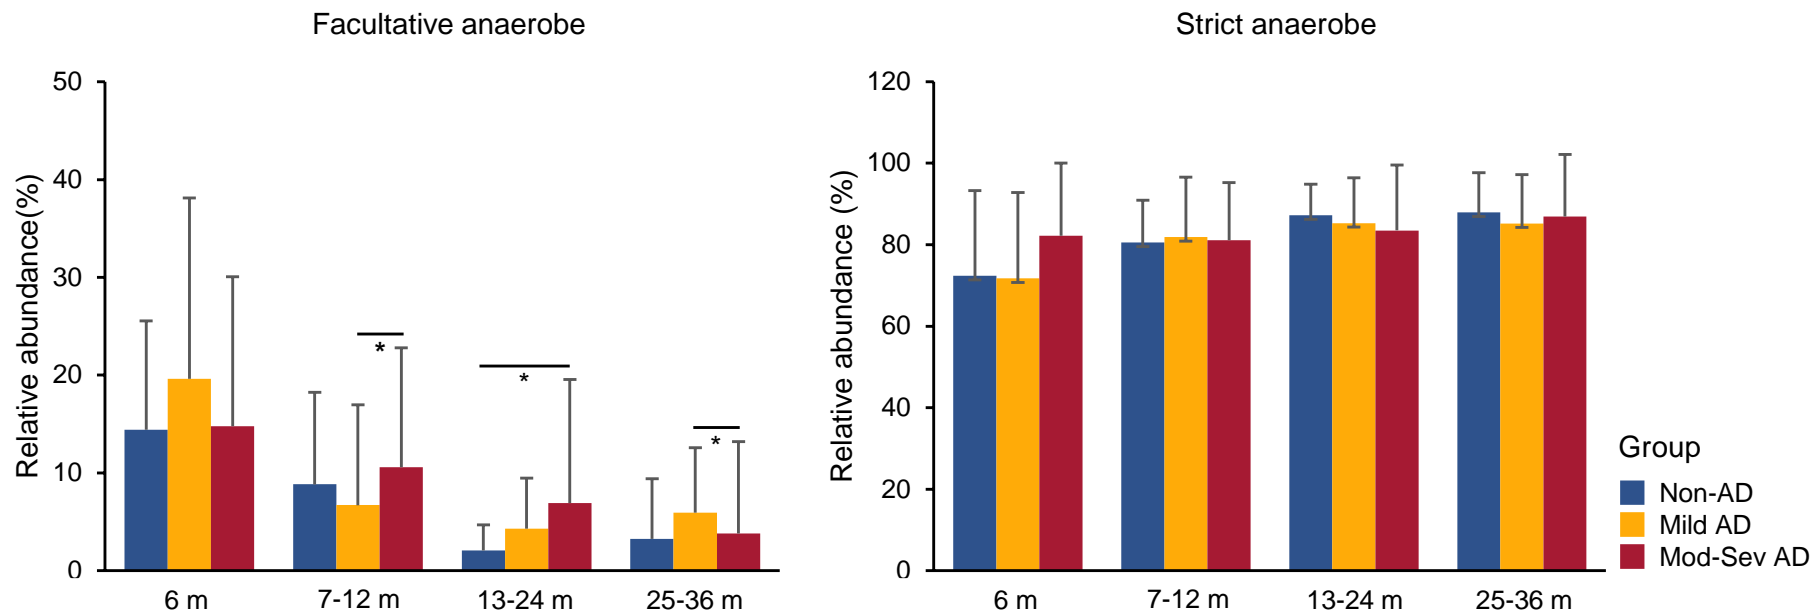

b

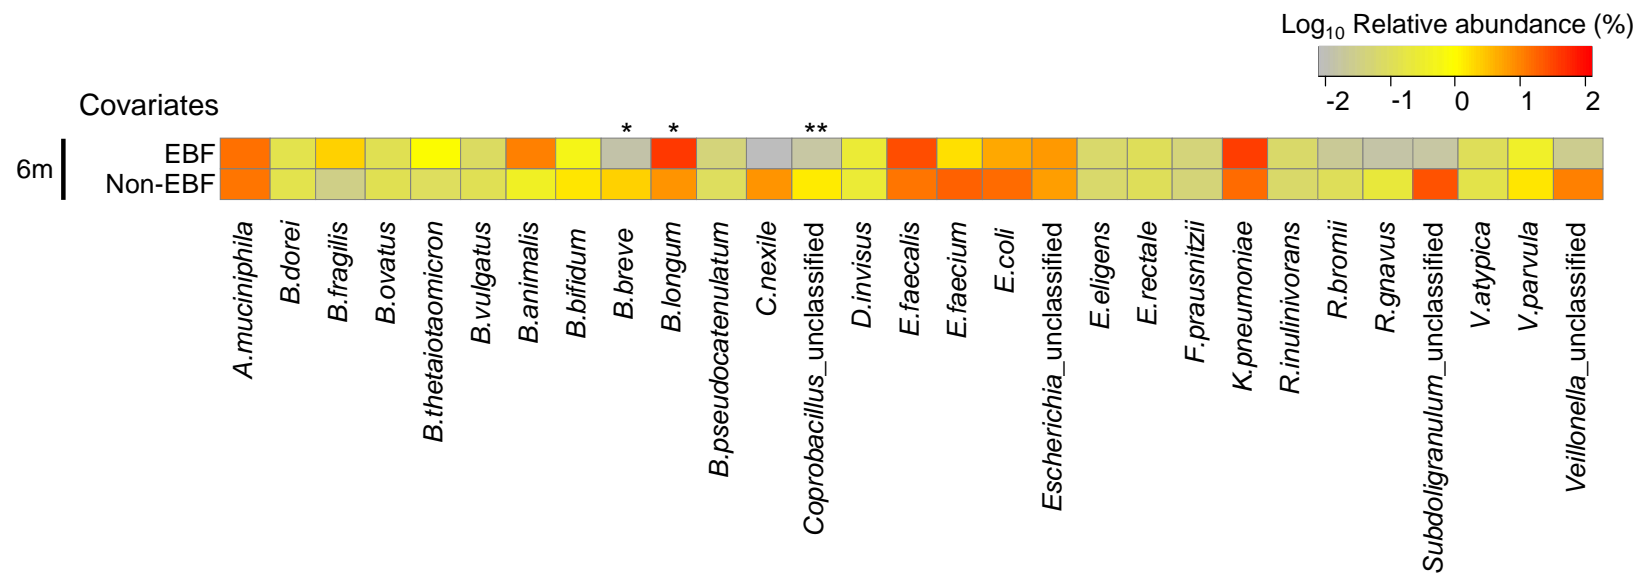

Fig. S6

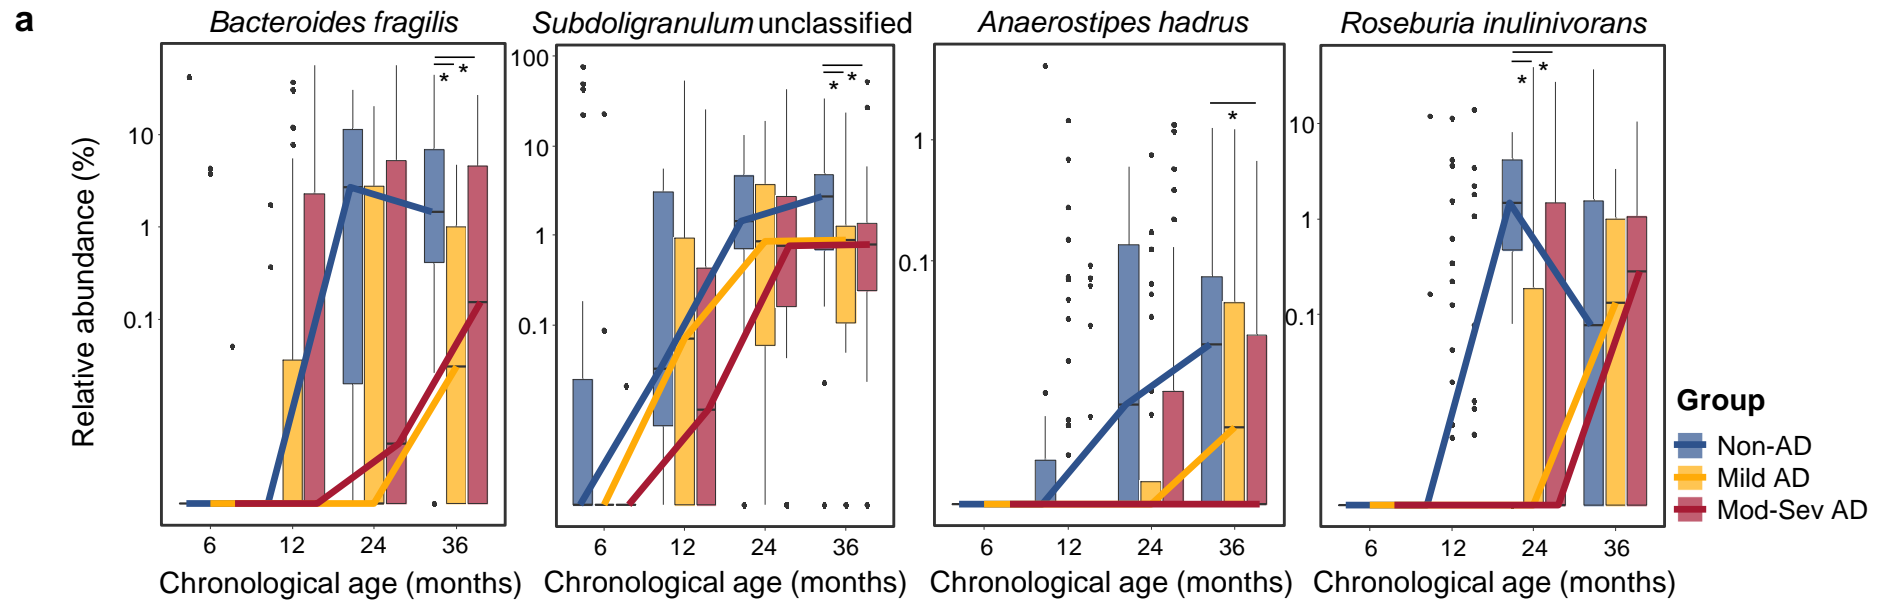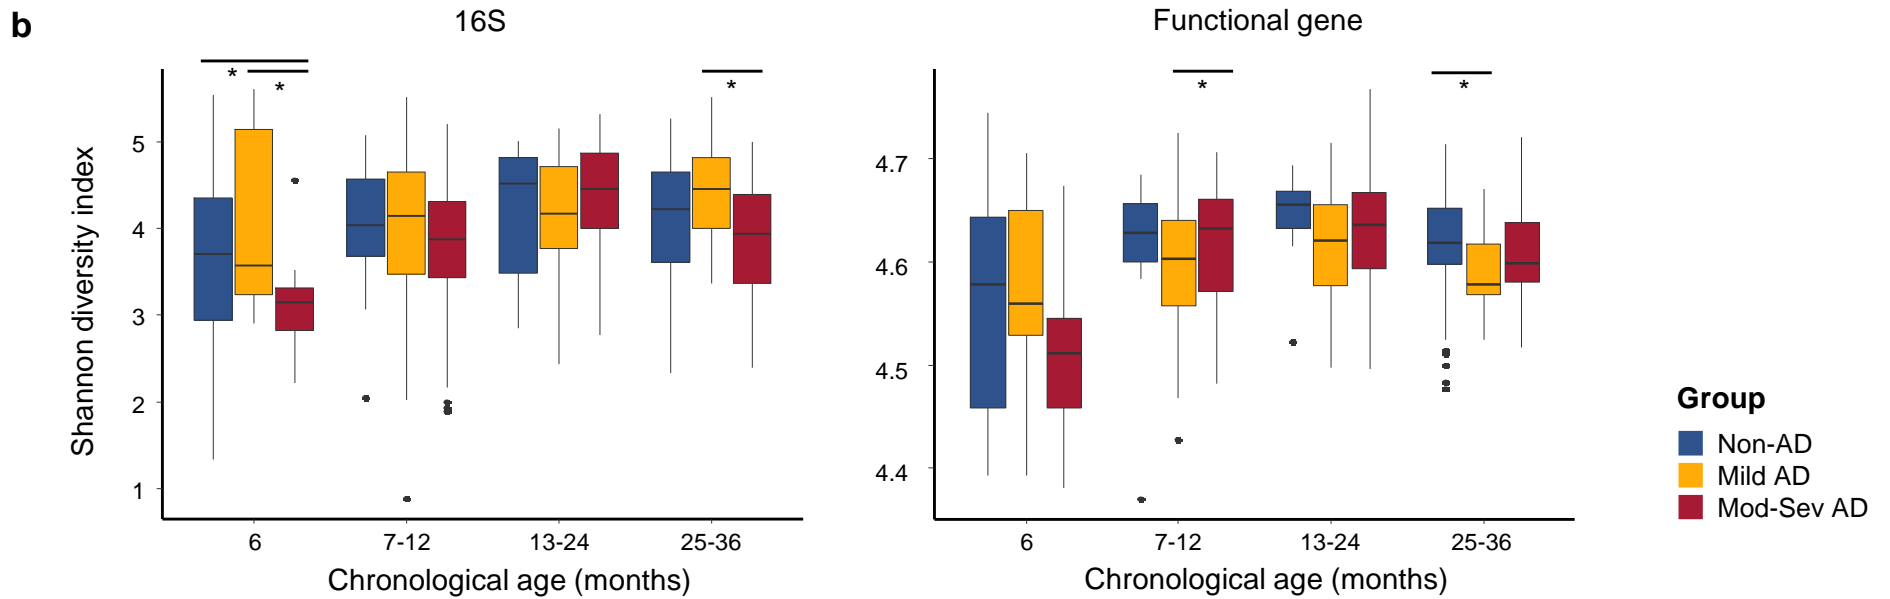

Fig. S7

All subject

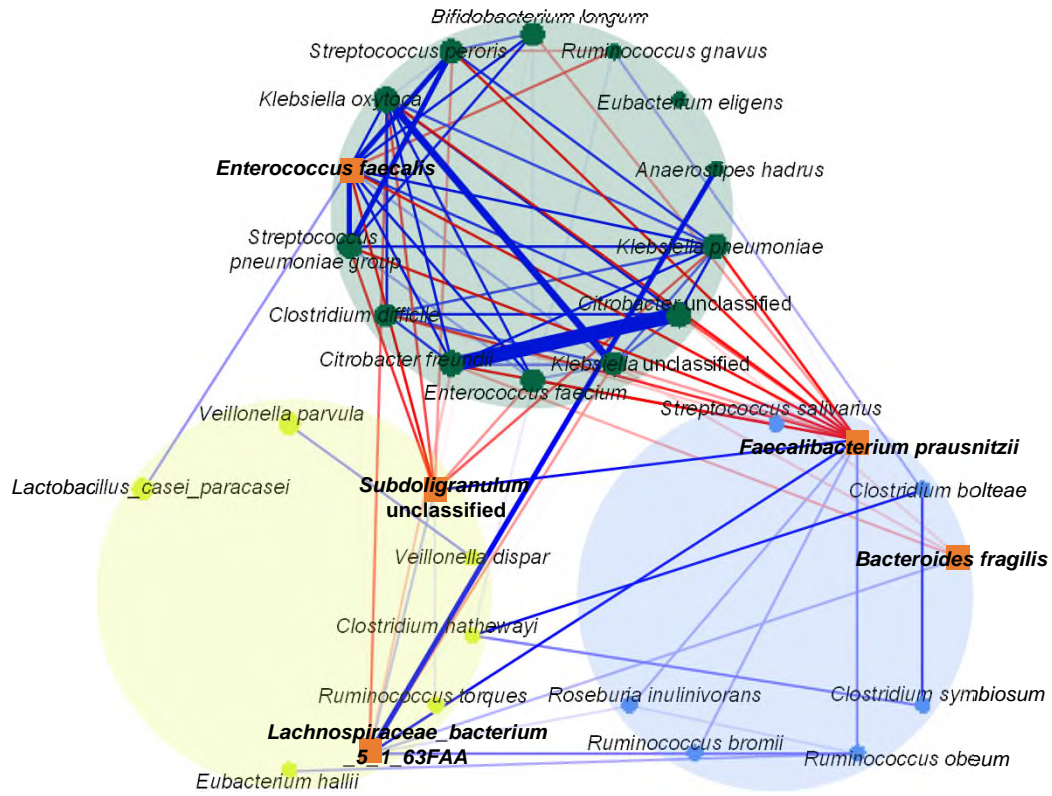

AD group

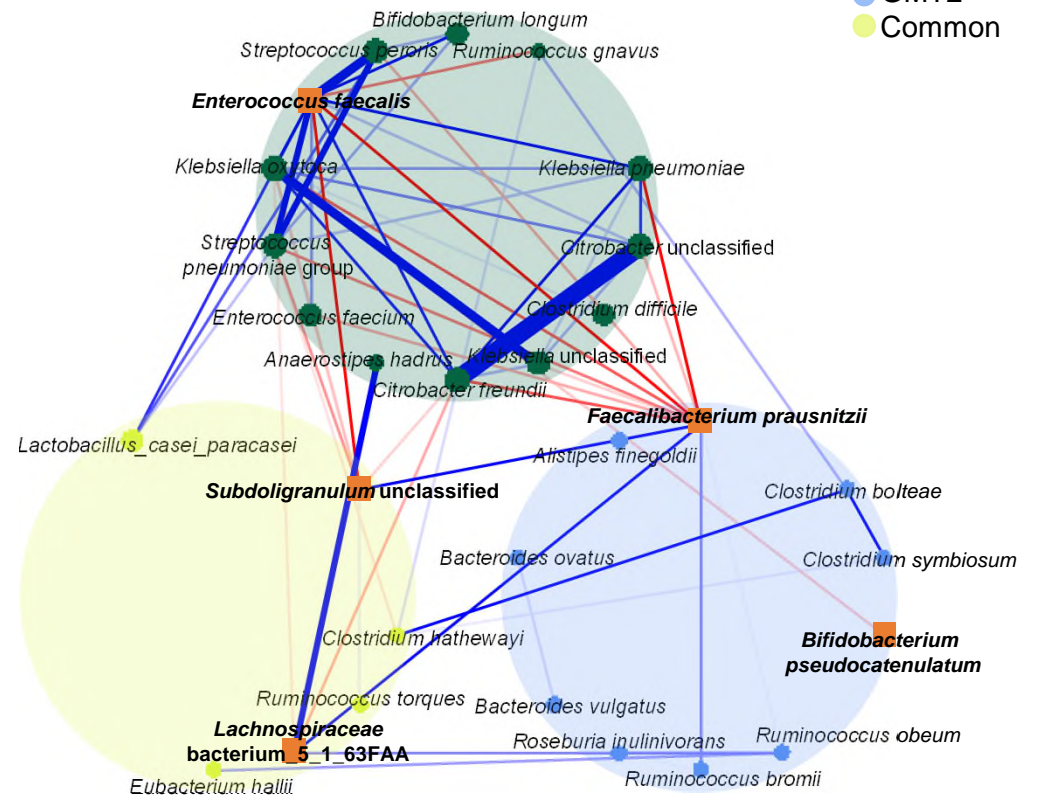

**Group**  
● GMT1  
● GMT2  
● Common



Fig. S8

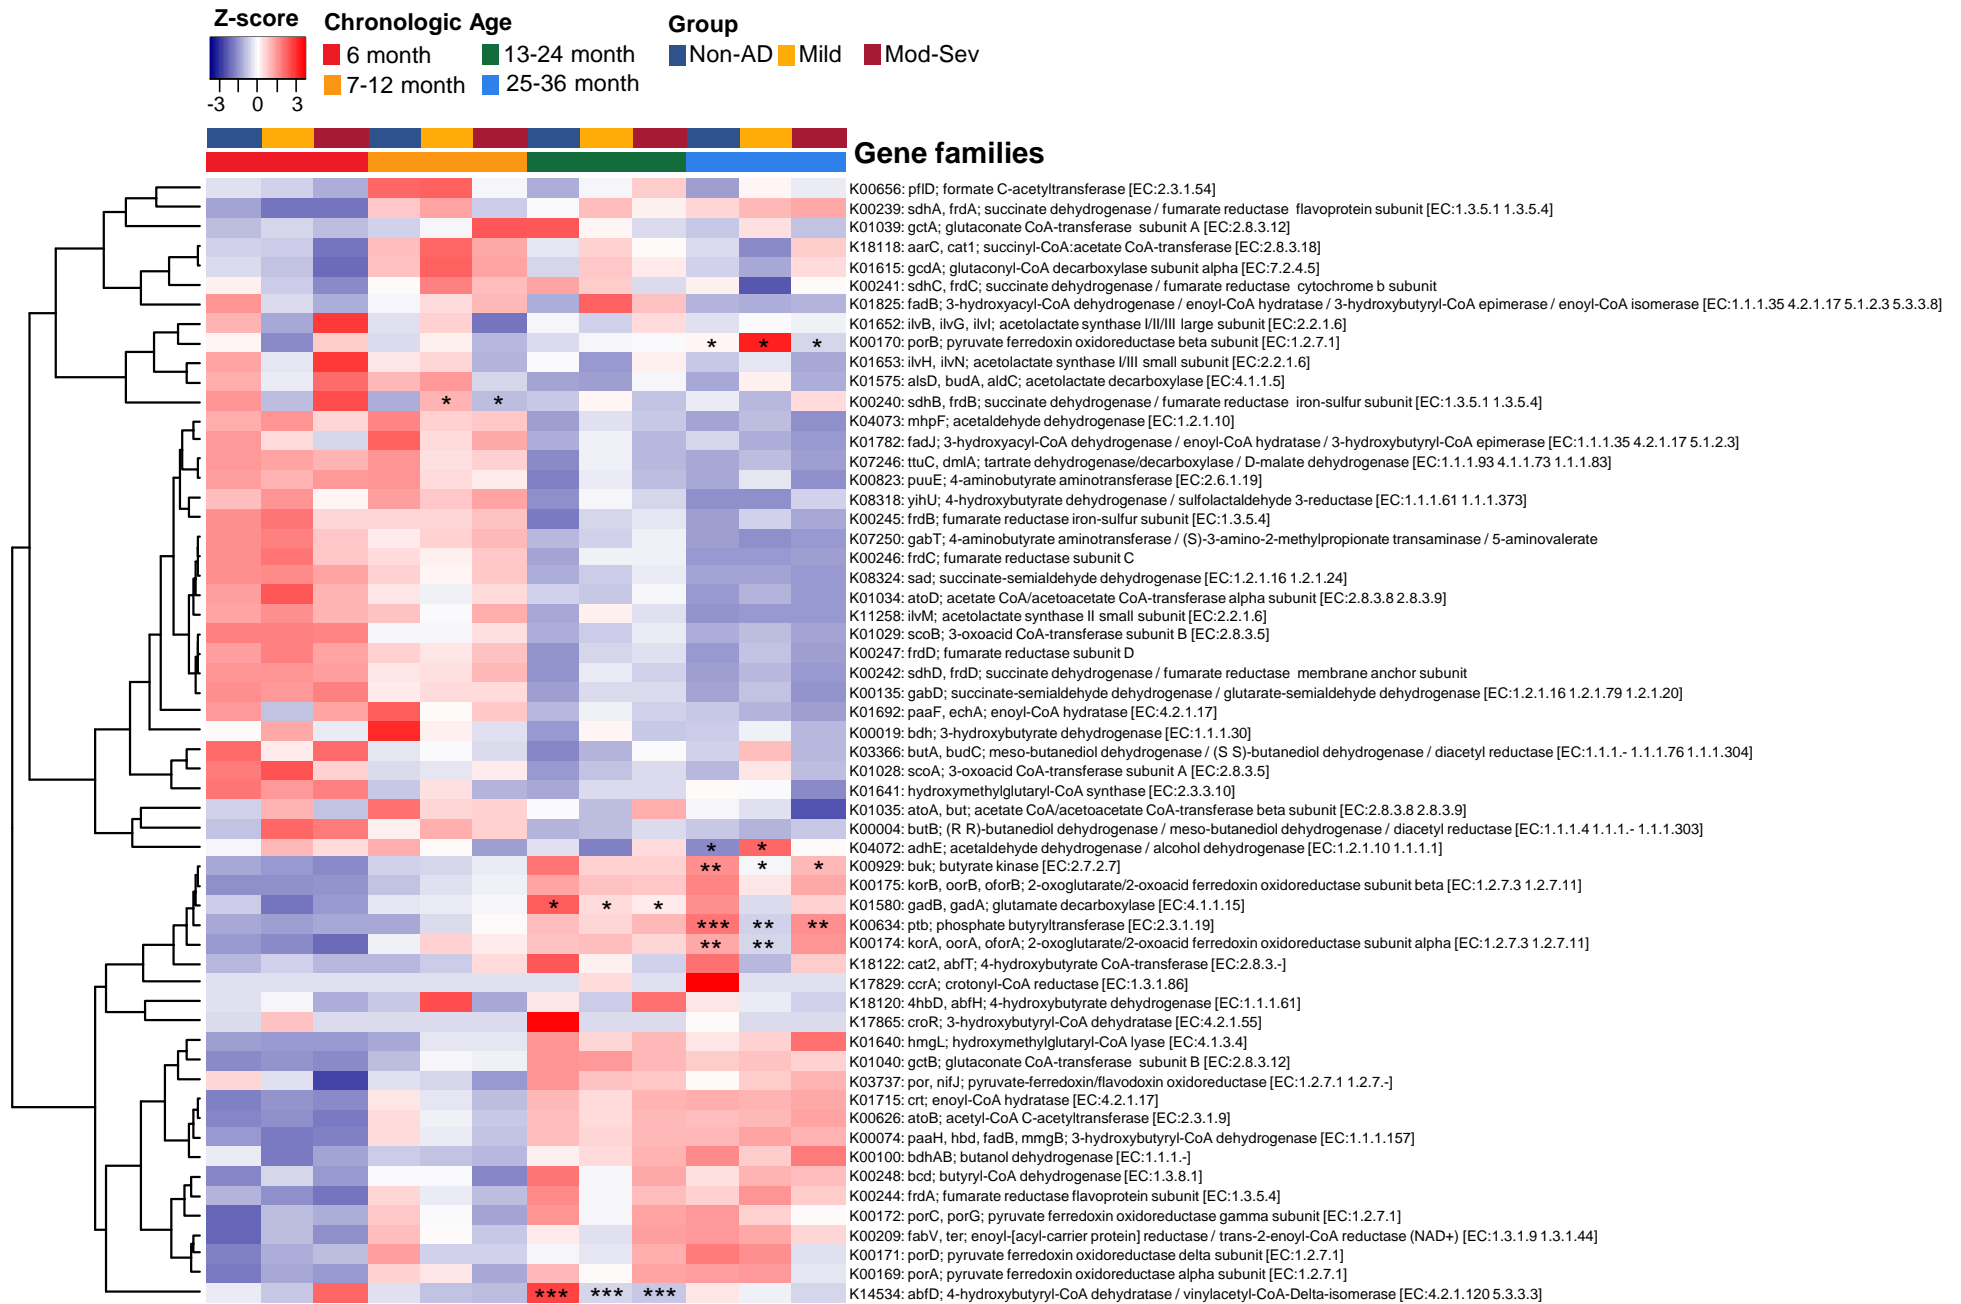



Fig. S10

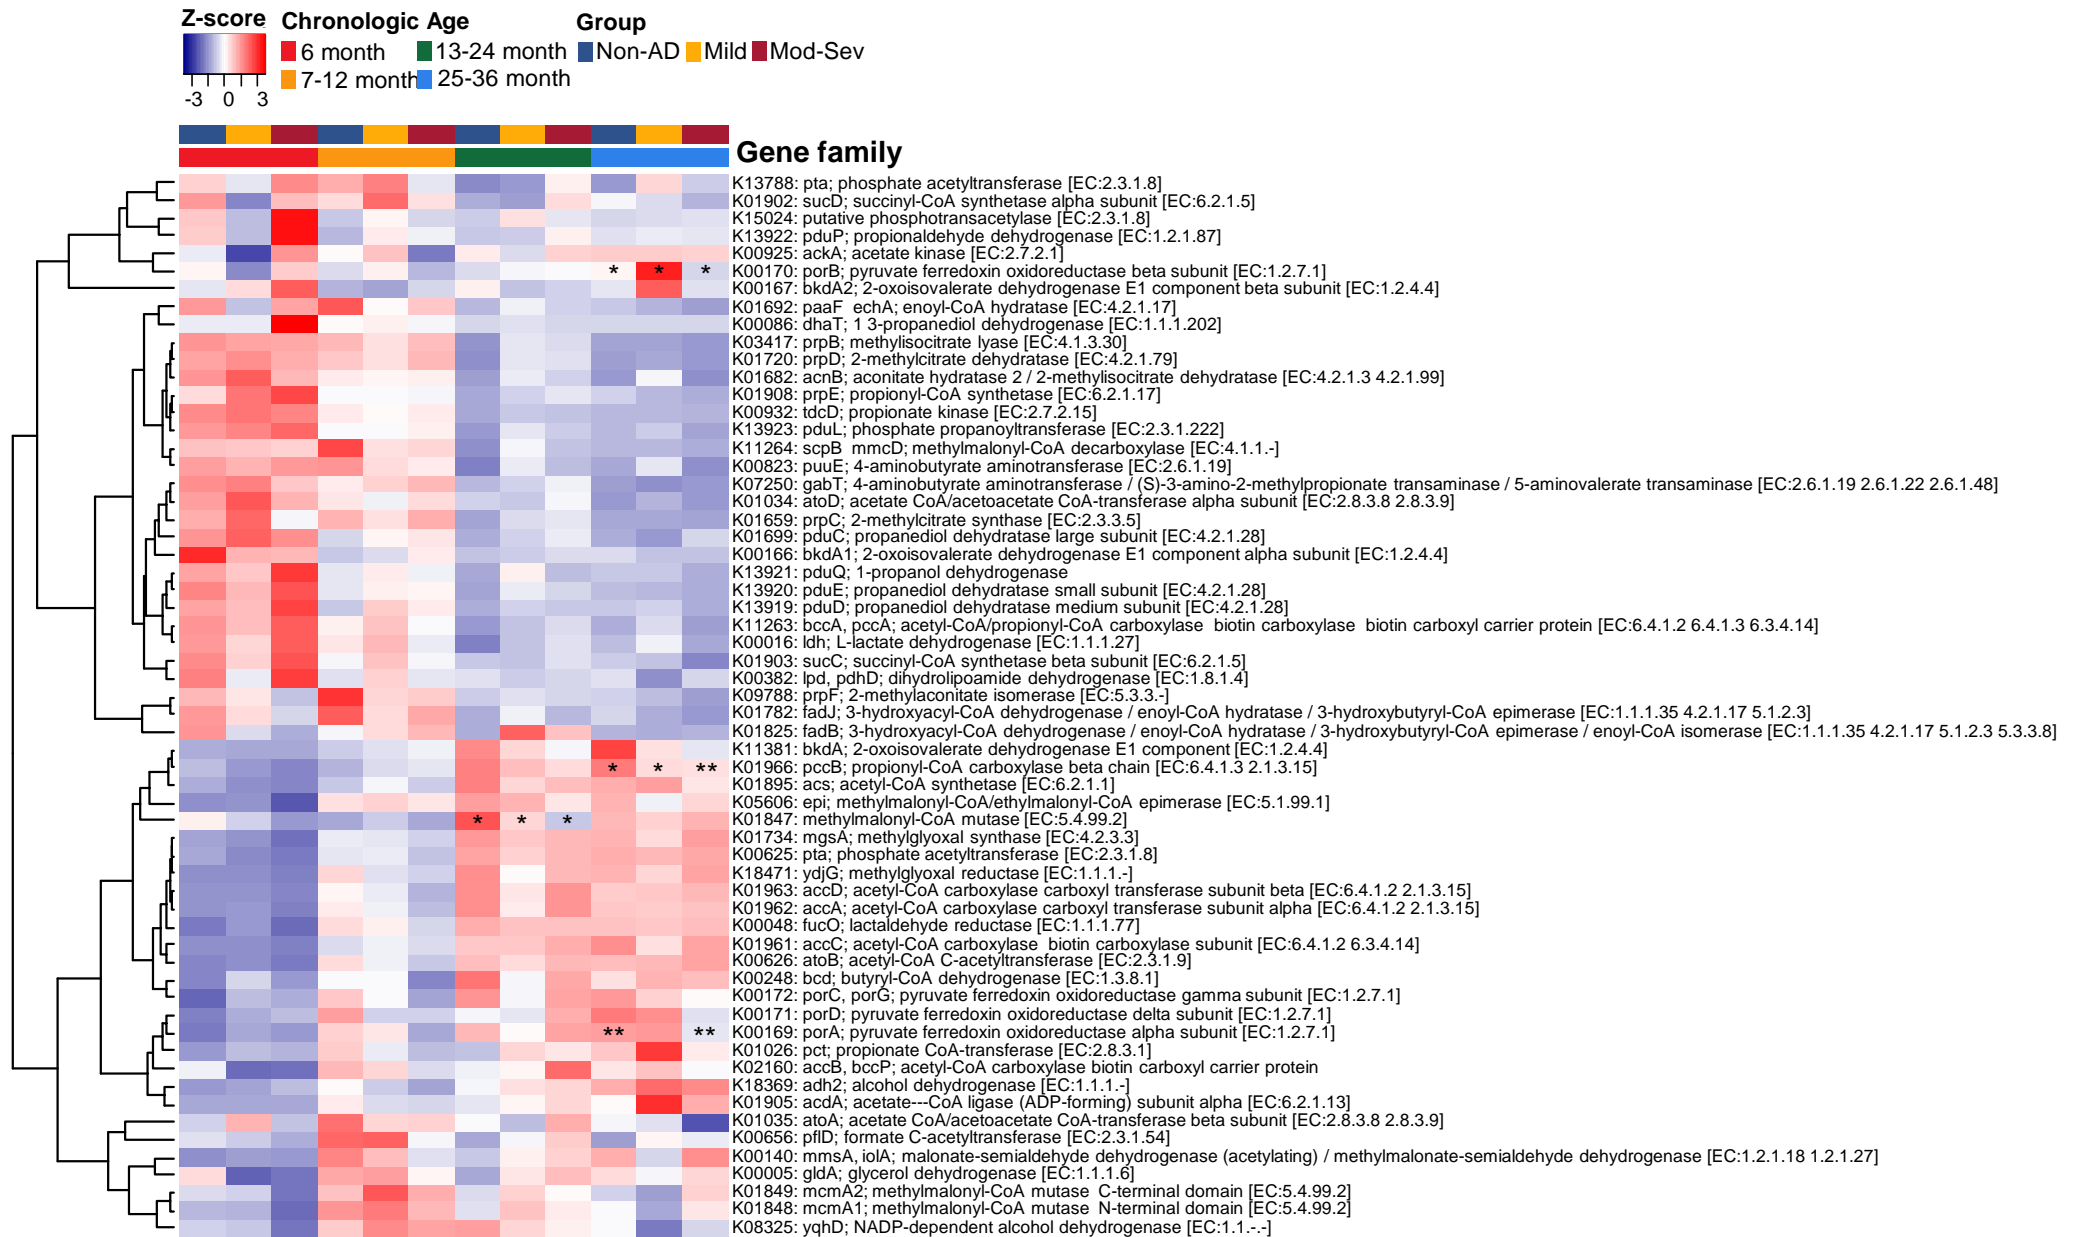



**Table S1.** Simulated effect sizes ( $\omega^2$ ) for PERMANOVA power of 80% and 90% with varied sample sizes. The micropower R-package was used to calculate the statistical power of sample sizes based on the weighted UniFrac distance of within-group distance variance with a significance level of 0.05.

| Sample numbers<br>in each group | Simulated omega2 ( $\omega^2$ ) |           |
|---------------------------------|---------------------------------|-----------|
|                                 | power 80%                       | power 90% |
| 20                              | 0.3489                          | 0.5773    |
| 40                              | 0.0624                          | 0.2551    |
| 60                              | 0.0013                          | 0.0409    |
| 80                              | < 0.0001                        | 0.0010    |
| 100                             | < 0.0001                        | < 0.0001  |
| 120                             | < 0.0001                        | < 0.0001  |

**Table S2.** Clinical characteristics of the study subjects.

| Variables                                                       | Non-AD          | AD               |                       | P value |
|-----------------------------------------------------------------|-----------------|------------------|-----------------------|---------|
|                                                                 |                 | Mild AD          | Moderate to Severe AD |         |
| Number of subjects at each age (6/ 7-12/ 13-24/ 25-36 months)   | 31/ 15/ 12/ 54  | 13/ 52/ 32/ 13   | 9/ 37/ 49/ 29         |         |
| Number of samples                                               | 112             | 110              | 124                   | 0.474   |
| Male (%)                                                        | 52.7            | 54.5             | 66.9                  | 0.052   |
| SCORAD index                                                    | NA              | 10.6 ± 2.9       | 40.4 ± 14.2           | <0.001  |
| Delivery mode, vaginal delivery/ cesarean delivery/ unknown (%) | 62.5/ 35.7/ 1.8 | 42.7/ 24.6/ 32.7 | 47.6/ 19.4/ 33.0      | 0.492   |
| Parental history of allergic diseases, yes (%)                  | 37.5            | 74.5             | 68.5                  | <0.001  |
| Serum eosinophils (%)                                           | 3.1 ± 1.7       | 4.8 ± 2.9        | 9.7 ± 23.7            | <0.001  |
| Total IgE (IU/ml)                                               | 25.5 ± 31.3     | 115.8 ± 266.1    | 326.1 ± 791.4         | <0.001  |
| Egg IgE (IU/ml)                                                 | 0.1 ± 0.4       | 7.3 ± 17.7       | 9.4 ± 17.9            | <0.001  |
| Milk IgE (IU/ml)                                                | 0.2 ± 0.7       | 0.9 ± 1.8        | 5.3 ± 16.8            | <0.001  |
| Feeding                                                         |                 |                  |                       | 0.1155  |
| Exclusive breastfeeding (%)                                     | 33.9            | 48.2             | 50                    |         |
| Non-exclusive breastfeeding (%)                                 | 19.6            | 14.5             | 14.5                  |         |
| Unknown (%)                                                     | 46.5            | 37.3             | 35.5                  |         |
| Solid-food intake (starting month)                              | 5.4 ± 0.68      | 5.7 ± 0.97       | 5.8 ± 0.95            | 0.0716  |

**Table S3.** Number of samples analyzed for each dataset at each age.

| Data Type | Phenotype          | 6months | 7-12 months | 13-24 months | 25-36 months |
|-----------|--------------------|---------|-------------|--------------|--------------|
| 16S       | Non-AD             | 31      | 15          | 12           | 54           |
|           | Mild AD            | 13      | 52          | 32           | 13           |
|           | Moderate-Severe AD | 9       | 37          | 49           | 29           |
| WMS       | Non-AD             | 31      | 15          | 12           | 54           |
|           | Mild AD            | 13      | 49          | 32           | 13           |
|           | Moderate-Severe AD | 9       | 37          | 49           | 29           |
| RTP       | Non-AD             | 19      | 15          | 12           | 54           |
|           | Mild AD            | 6       | 52          | 32           | 13           |
|           | Moderate-Severe AD | 8       | 37          | 49           | 29           |
| SCFA      | Non-AD             | 31      | 15          | 12           | 54           |
|           | Mild AD            | 13      | 49          | 32           | 13           |
|           | Moderate-Severe AD | 9       | 37          | 49           | 29           |

**Table S4.** Comparison of odds ratio (OR) for covariates between GMT1 and GMT2. CI: confidence interval.

| Dataset | Variable                               | GMT1 (n=163)          | GMT2 (n=180)          | Odd ratio (95% CI), <i>P</i> value   |
|---------|----------------------------------------|-----------------------|-----------------------|--------------------------------------|
|         |                                        |                       |                       | GMT1 vs GMT2                         |
|         | Non-AD/ Mild AD/ Moderate to Severe AD | 46/ 64/ 53            | 66/ 43/ 71            | 0.978 (0.757-1.263, <i>P</i> =0.866) |
|         | Age                                    | 10.0 ± 7.64           | 24.0 ± 9.63           | 1.163 (0.081-1.163, <i>P</i> <2e-16) |
|         | Vaginal delivery / C-section           | 85 (53.8) / 46 (29.1) | 92 (48.9) / 43 (22.9) | 0.864 (0.518-1.438, <i>P</i> =0.573) |
| WMS     | Exclusive breastfeeding                | 81 (49.7)             | 70 (38.9)             | 1.549 (1.009-2.387, <i>P</i> =0.051) |
|         | Family history                         | 100 (63.3)            | 107 (56.9)            | 0.949 (0.614-1.467, <i>P</i> =0.815) |
|         | Egg IgE (>0.35 IU/ml)                  | 70 (44.3)             | 63 (33.5)             | 0.828 (0.524-1.305, <i>P</i> =0.416) |
|         | Milk IgE (>0.35 IU/ml)                 | 49 (31.0)             | 50 (26.6)             | 1.031 (0.635-1.674, <i>P</i> =0.902) |
| Dataset | Variable                               | GMT1 (n=158)          | GMT2 (n=188)          | Odd ratio (95% CI), <i>P</i> value   |
|         | Non-AD/ Mild AD/ Moderate to Severe AD | 45/ 62/ 51            | 67/ 48/ 73            | 0.991 (0.767-1.281, <i>P</i> =0.946) |
|         | Age                                    | 10.0 ± 7.74           | 24.0 ± 10.16          | 1.138 (1.107-1.175, <i>P</i> <2e-16) |
|         | Vaginal delivery / C-section           | 81 (51.3) / 45 (28.5) | 97 (51.6) / 45 (23.9) | 0.835 (0.502-1.389, <i>P</i> =0.486) |
| 16S     | Exclusive breastfeeding                | 81 (51.3)             | 72 (38.3)             | 1.479 (0.964-2.276, <i>P</i> =0.082) |
|         | Family history                         | 105 (66.5)            | 103 (54.8)            | 1.009 (0.542-1.920, <i>P</i> =0.976) |
|         | Egg IgE (>0.35 IU/ml)                  | 68 (43.0)             | 68 (36.2)             | 0.814 (0.516-1.281, <i>P</i> =0.374) |
|         | Milk IgE (>0.35 IU/ml)                 | 49 (31.0)             | 51 (27.1)             | 0.886 (0.546-1.436, <i>P</i> =0.622) |

**Table S5.** Mean relative abundance of top 20 genera between GMT1 and GMT2 determined by DMM modeling. We used the Benjamini–Hochberg method adjusted  $p$ -value to calculate the  $q$  value (false discovery rate adjusted  $p$ -value).

| Dataset | Genus                             | Prevalence (%) | Mean relative abundance (%) |              | $q$ value (corrected $P$ ) |
|---------|-----------------------------------|----------------|-----------------------------|--------------|----------------------------|
|         |                                   |                | GMT1 (n=163)                | GMT2 (n=180) |                            |
| WMS     | <i>Bifidobacterium</i>            | 99.1           | 47.73                       | 16.83        | <2.2e-16                   |
|         | <i>Faecalibacterium</i>           | 63.8           | 1.34                        | 14.58        | <2.2e-16                   |
|         | <i>Bacteroides</i>                | 62.1           | 3.53                        | 17.63        | <2.2e-16                   |
|         | <i>Escherichia</i>                | 91.5           | 8.56                        | 2.71         | 3.4.E-12                   |
|         | <i>Ruminococcus</i>               | 46.1           | 1.25                        | 6.64         | <2.2e-16                   |
|         | <i>Eubacterium</i>                | 66.5           | 1.33                        | 5.13         | <2.2e-16                   |
|         | <i>Veillonella</i>                | 97.4           | 10.21                       | 3.51         | 9.2.E-04                   |
|         | <i>Roseburia</i>                  | 59.8           | 0.52                        | 3.71         | <2.2e-16                   |
|         | <i>Subdoligranulum</i>            | 71.7           | 2.54                        | 4.15         | <2.2e-16                   |
|         | <i>Coprobacillus</i>              | 78.7           | 2.18                        | 1.00         | 9.5.E-02                   |
|         | <i>Enterococcus</i>               | 54.2           | 1.85                        | 0.17         | <2.2e-16                   |
|         | <i>Alistipes</i>                  | 28.9           | 0.05                        | 2.04         | 9.0.E-20                   |
|         | <i>Dialister</i>                  | 21.3           | 0.05                        | 3.89         | 2.9.E-14                   |
|         | <i>Blautia</i>                    | 81.0           | 6.59                        | 4.11         | 4.2.E-04                   |
|         | <i>Erysipelotrichaceae_noname</i> | 77.8           | 0.89                        | 0.30         | 3.3.E-04                   |
|         | <i>Klebsiella</i>                 | 45.5           | 1.13                        | 0.07         | <2.2e-16                   |
|         | <i>Clostridium</i>                | 85.7           | 3.65                        | 3.29         | 7.1.E-05                   |
|         | <i>Parabacteroides</i>            | 27.4           | 0.10                        | 0.83         | 6.2.E-12                   |
|         | <i>Lactobacillus</i>              | 43.7           | 1.33                        | 0.36         | 2.8.E-07                   |
|         | <i>Lachnospiraceae_noname</i>     | 73.8           | 0.39                        | 1.07         | <2.2e-16                   |

  

| Dataset | Genus                   | Prevalence (%) | Mean relative abundance (%) |              | $q$ value (corrected $P$ ) |
|---------|-------------------------|----------------|-----------------------------|--------------|----------------------------|
|         |                         |                | GMT1 (n=158)                | GMT2 (n=188) |                            |
|         | <i>Faecalibacterium</i> | 66.8           | 1.62                        | 36.62        | <2.2e-16                   |
|         | <i>Bifidobacterium</i>  | 98.0           | 31.44                       | 16.39        | 4.E-09                     |
|         | <i>Escherichia</i>      | 84.7           | 16.17                       | 2.63         | <2.2e-16                   |
|         | <i>Bacteroides</i>      | 63.0           | 5.01                        | 12.73        | <2.2e-16                   |
|         | <i>Clostridium_g6</i>   | 76.6           | 4.62                        | 0.69         | 3.E-07                     |

|     |                        |      |      |      |          |
|-----|------------------------|------|------|------|----------|
|     | <i>Veillonella</i>     | 74.0 | 5.79 | 1.34 | 1.E-11   |
|     | <i>Ruminococcus_g2</i> | 40.8 | 0.91 | 3.22 | <2.2e-16 |
|     | <i>Klebsiella</i>      | 52.9 | 2.25 | 0.04 | <2.2e-16 |
|     | <i>Enterococcus</i>    | 37.9 | 2.37 | 0.05 | <2.2e-16 |
| 16S | <i>Clostridium_g21</i> | 69.1 | 5.69 | 1.67 | 9.E-01   |
|     | <i>Citrobacter</i>     | 64.2 | 1.16 | 0.04 | <2.2e-16 |
|     | <i>Streptococcus</i>   | 68.2 | 1.85 | 0.30 | 8.E-05   |
|     | <i>Enterobacter</i>    | 71.1 | 1.35 | 0.36 | <2.2e-16 |
|     | <i>Eubacterium_g23</i> | 26.6 | 0.11 | 1.74 | <2.2e-16 |
|     | <i>Blautia</i>         | 76.9 | 2.78 | 3.17 | 6.E-06   |
|     | <i>Dialister</i>       | 22.8 | 0.00 | 1.81 | 2.E-16   |
|     | <i>Kosakonia</i>       | 57.2 | 0.57 | 0.02 | <2.2e-16 |
|     | <i>Eubacterium_g1</i>  | 46.0 | 0.76 | 0.07 | 2.E-08   |
|     | <i>Anaerostipes</i>    | 61.3 | 0.71 | 1.08 | 2.E-15   |
|     | <i>Roseburia</i>       | 53.5 | 0.46 | 0.83 | <2.2e-16 |

---

**Table S6.** Comparison of indicator species for each age among phenotypic groups. Indicator species were selected after prefiltering by > 10% of prevalence and > 0.01% relative abundance in at least one group.

| Indicator species                            | Indicator Age | R-squared | P value | Non-AD                      |                | Mild AD                     |                | Moderate to Severe AD       |                |
|----------------------------------------------|---------------|-----------|---------|-----------------------------|----------------|-----------------------------|----------------|-----------------------------|----------------|
|                                              |               |           |         | Mean relative abundance (%) | Prevalence (%) | Mean relative abundance (%) | Prevalence (%) | Mean relative abundance (%) | Prevalence (%) |
| <i>Bifidobacterium longum</i>                | 6 months      | 0.546     | 0.0002  | 39.22                       | 100.0          | 40.49                       | 100.0          | 62.11                       | 100.0          |
| <i>Enterococcus faecalis</i>                 | 6 months      | 0.364     | 0.0066  | 1.24                        | 74.2           | 0.93                        | 76.9           | 2.14                        | 66.7           |
| <i>Streptococcus mitis oralis pneumoniae</i> | 6 months      | 0.335     | 0.0034  | 0.14                        | 64.5           | 0.06                        | 61.5           | 0.07                        | 66.7           |
| <i>Klebsiella pneumoniae</i>                 | 6 months      | 0.329     | 0.0118  | 1.20                        | 71.0           | 1.56                        | 61.5           | 0.60                        | 44.4           |
| <i>Escherichia coli</i>                      | 6-12 months   | 0.369     | 0.0071  | 7.35                        | 91.3           | 5.15                        | 93.5           | 7.20                        | 89.1           |
| <i>Klebsiella_unclassified</i>               | 6-12 months   | 0.330     | 0.0120  | 0.10                        | 54.3           | 0.09                        | 45.2           | 0.06                        | 28.3           |
| <i>Megasphaera micronuciformis</i>           | 7-12 months   | 0.355     | 0.0048  | 1.41                        | 26.7           | 0.34                        | 38.8           | 0.23                        | 35.1           |
| <i>Bifidobacterium bifidum</i>               | 7-12 months   | 0.320     | 0.0213  | 18.36                       | 53.3           | 11.77                       | 65.3           | 8.24                        | 48.6           |
| <i>Bifidobacterium breve</i>                 | 7-12 months   | 0.318     | 0.0180  | 6.72                        | 73.3           | 13.06                       | 89.8           | 8.53                        | 75.7           |
| <i>Bacteroides ovatus</i>                    | 13-24 months  | 0.389     | 0.0018  | 5.36                        | 41.7           | 2.70                        | 31.3           | 1.27                        | 30.6           |
| <i>Oscillibacter_unclassified</i>            | 13-24 months  | 0.352     | 0.0065  | 1.49                        | 50.0           | 0.25                        | 21.9           | 0.15                        | 22.4           |
| <i>Alistipes finegoldii</i>                  | 13-24 months  | 0.330     | 0.0033  | 3.08                        | 66.7           | 0.03                        | 6.3            | 0.12                        | 6.1            |
| <i>Alistipes_unclassified</i>                | 13-24 months  | 0.323     | 0.0020  | 1.98                        | 33.3           | 0.07                        | 3.1            | 0.09                        | 8.2            |
| <i>Faecalibacterium prausnitzii</i>          | 13-36 months  | 0.529     | 0.0001  | 14.15                       | 90.9           | 11.24                       | 84.4           | 13.37                       | 87.2           |
| <i>Bacteroides fragilis</i>                  | 13-36 months  | 0.358     | 0.0075  | 6.26                        | 89.4           | 2.00                        | 53.3           | 4.65                        | 57.7           |
| <i>Ruminococcus bromii</i>                   | 13-36 months  | 0.341     | 0.0150  | 4.95                        | 63.6           | 4.26                        | 42.2           | 4.53                        | 48.7           |
| <i>Dialister invisus</i>                     | 13-36 months  | 0.303     | 0.0217  | 6.27                        | 48.5           | 2.13                        | 24.4           | 2.10                        | 26.9           |

**Table S7.** Indicator species at each time point were evaluated after adjusting sex, feeding type, AD phenotype, and family history using MaAsLin 2 ( $q < 0.25$ ). The time point of 6 months was used as a reference for the analysis. The analyzed species were selected after prefiltering for  $> 10\%$  of prevalence and  $> 0.01\%$  relative abundance in at least one group.  $P$ -value was adjusted by the Benjamini–Hochberg method to calculate the  $q$  value (false discovery rate adjusted  $p$ -value).

| Species                                      | Time point   | Coefficient | Standard error | N   | N not 0 | $P$ value | $q$ value |
|----------------------------------------------|--------------|-------------|----------------|-----|---------|-----------|-----------|
| <i>Bifidobacterium longum</i>                | 7-12 months  | -0.2079     | 0.0246         | 343 | 331     | 8.72E-16  | 6.49E-13  |
| <i>Bifidobacterium longum</i>                | 13-24 months | -0.2525     | 0.0259         | 343 | 331     | 5.93E-20  | 8.82E-17  |
| <i>Bifidobacterium longum</i>                | 25-36 months | -0.2734     | 0.0239         | 343 | 331     | 8.76E-26  | 2.61E-22  |
| <i>Enterococcus faecalis</i>                 | 7-12 months  | -0.0102     | 0.0033         | 343 | 80      | 0.0022524 | 0.1117579 |
| <i>Enterococcus faecalis</i>                 | 13-24 months | -0.0122     | 0.0035         | 343 | 80      | 0.0005296 | 0.0463668 |
| <i>Enterococcus faecalis</i>                 | 25-36 months | -0.0135     | 0.0032         | 343 | 80      | 3.63E-05  | 0.0060058 |
| <i>Streptococcus mitis oralis pneumoniae</i> | 7-12 months  | -0.0009     | 0.0002         | 343 | 86      | 3.38E-06  | 0.0008394 |
| <i>Streptococcus mitis oralis pneumoniae</i> | 13-24 months | -0.0010     | 0.0002         | 343 | 86      | 1.40E-06  | 0.0003792 |
| <i>Streptococcus mitis oralis pneumoniae</i> | 25-36 months | -0.0011     | 0.0002         | 343 | 86      | 1.07E-08  | 4.56E-06  |
| <i>Klebsiella pneumoniae</i>                 | 25-36 months | -0.0119     | 0.0037         | 343 | 107     | 0.001543  | 0.0866725 |
| <i>Escherichia coli</i>                      | 7-12 months  | -0.0408     | 0.0119         | 343 | 302     | 0.0006784 | 0.0557524 |
| <i>Escherichia coli</i>                      | 13-24 months | -0.0618     | 0.0125         | 343 | 302     | 1.25E-06  | 0.0003715 |
| <i>Escherichia coli</i>                      | 25-36 months | -0.0644     | 0.0116         | 343 | 302     | 5.32E-08  | 1.76E-05  |
| <i>Klebsiella_unclassified</i>               | 13-24 months | -0.0009     | 0.0003         | 343 | 95      | 0.0078434 | 0.2398792 |
| <i>Klebsiella_unclassified</i>               | 25-36 months | -0.0009     | 0.0003         | 343 | 95      | 0.0054211 | 0.1968131 |
| <i>Megasphaera micronuciformis</i>           | 7-12 months  | 0.0046      | 0.0015         | 343 | 101     | 0.0019076 | 0.0979105 |
| <i>Bifidobacterium breve</i>                 | 7-12 months  | 0.0443      | 0.0148         | 343 | 256     | 0.0030533 | 0.1336729 |
| <i>Bacteroides ovatus</i>                    | 13-24 months | 0.0242      | 0.0069         | 343 | 100     | 0.0005059 | 0.0456365 |
| <i>Oscillibacter_unclassified</i>            | 13-24 months | 0.0053      | 0.0015         | 343 | 84      | 0.0003709 | 0.035614  |
| <i>Alistipes_unclassified</i>                | 13-24 months | 0.0049      | 0.0018         | 343 | 23      | 0.0060509 | 0.213485  |
| <i>Faecalibacterium prausnitzii</i>          | 13-24 months | 0.0943      | 0.0166         | 343 | 219     | 3.06E-08  | 1.14E-05  |
| <i>Faecalibacterium prausnitzii</i>          | 25-36 months | 0.1374      | 0.0153         | 343 | 219     | 2.55E-17  | 2.53E-14  |
| <i>Bacteroides fragilis</i>                  | 13-24 months | 0.0422      | 0.0139         | 343 | 160     | 0.0026301 | 0.1204564 |
| <i>Ruminococcus bromii</i>                   | 13-24 months | 0.0417      | 0.0122         | 343 | 129     | 0.00075   | 0.0557524 |
| <i>Ruminococcus bromii</i>                   | 25-36 months | 0.0414      | 0.0113         | 343 | 129     | 0.0002982 | 0.0317012 |
| <i>Dialister invisus</i>                     | 25-36 months | 0.0443      | 0.0111         | 343 | 68      | 7.86E-05  | 0.0097501 |



**Table S8.** Correlation between covariates and microbiota variation. The correlations were determined using the EnvFit model based on Bray–Curtis dissimilarity in each dataset.

| Dataset    | Variable                               | 6 months  |                | 7-12 months |                | 13-24 months |                | 25-36 months |                |
|------------|----------------------------------------|-----------|----------------|-------------|----------------|--------------|----------------|--------------|----------------|
|            |                                        | R-squared | <i>P</i> value | R-squared   | <i>P</i> value | R-squared    | <i>P</i> value | R-squared    | <i>P</i> value |
| WMS        | Sex                                    | 0.029     | 0.574          | 0.013       | 0.686          | 0.007        | 0.865          | 0.028        | 0.557          |
|            | Mode of delivery                       | 0.103     | 0.125          | 0.002       | 0.925          | 0.022        | 0.664          | 0.025        | 0.586          |
|            | Exclusive breastfeeding                | 0.306     | <0.001         | 0.096       | 0.053          | 0.163        | 0.030          | 0.051        | 0.330          |
|            | Family history                         | 0.038     | 0.447          | 0.035       | 0.338          | 0.019        | 0.661          | 0.010        | 0.815          |
|            | Non-AD/AD                              | 0.049     | 0.117          | 0.036       | 0.117          | 0.031        | 0.286          | 0.042        | 0.167          |
|            | Non-AD/ Mild AD/ Moderate to Severe AD | 0.091     | 0.095          | 0.097       | 0.017          | 0.047        | 0.454          | 0.080        | 0.129          |
|            | Egg IgE (IU/ml)                        | 0.613     | 0.414          | 0.656       | 0.424          | 0.805        | 0.272          | 0.568        | 0.395          |
|            | Milk IgE (IU/ml)                       | 0.483     | 0.861          | 0.621       | 0.632          | 0.624        | 0.668          | 0.793        | 0.061          |
| Dataset    | Variable                               | 6 months  |                | 7-12 months |                | 13-24 months |                | 25-36 months |                |
|            |                                        | R-squared | <i>P</i> value | R-squared   | <i>P</i> value | R-squared    | <i>P</i> value | R-squared    | <i>P</i> value |
| 16S        | Sex                                    | 0.021     | 0.630          | 0.003       | 0.932          | 0.003        | 0.932          | 0.029        | 0.539          |
|            | Mode of delivery                       | 0.031     | 0.510          | 0.027       | 0.435          | 0.027        | 0.435          | 0.013        | 0.770          |
|            | Exclusive breastfeeding                | 0.173     | 0.015          | 0.033       | 0.345          | 0.033        | 0.345          | 0.048        | 0.345          |
|            | Family history                         | 0.099     | 0.126          | 0.018       | 0.593          | 0.018        | 0.593          | 0.008        | 0.841          |
|            | Non-AD/AD                              | 0.049     | 0.138          | 0.019       | 0.318          | 0.019        | 0.318          | 0.047        | 0.106          |
|            | Non-AD/ Mild AD/ Moderate to Severe AD | 0.132     | 0.027          | 0.034       | 0.376          | 0.034        | 0.376          | 0.079        | 0.124          |
|            | Egg IgE (IU/ml)                        | 0.590     | 0.466          | 0.683       | 0.371          | 0.683        | 0.371          | 0.625        | 0.160          |
|            | Milk IgE (IU/ml)                       | 0.548     | 0.531          | 0.573       | 0.855          | 0.573        | 0.855          | 0.782        | 0.086          |
| Dataset    | Variable                               | 6 months  |                | 7-12 months |                | 13-24 months |                | 25-36 months |                |
|            |                                        | R-squared | <i>P</i> value | R-squared   | <i>P</i> value | R-squared    | <i>P</i> value | R-squared    | <i>P</i> value |
| Genefamily | Sex                                    | 0.042     | 0.430          | 0.001       | 0.959          | 0.022        | 0.664          | 0.040        | 0.428          |
|            | Mode of delivery                       | 0.039     | 0.424          | 0.018       | 0.582          | 0.003        | 0.950          | 0.012        | 0.773          |
|            | Exclusive breastfeeding                | 0.269     | 0.043          | 0.081       | 0.084          | 0.089        | 0.154          | 0.045        | 0.395          |
|            | Family history                         | 0.015     | 0.714          | 0.025       | 0.483          | 0.068        | 0.234          | 0.049        | 0.345          |
|            | Non-AD/AD                              | 0.064     | 0.061          | 0.015       | 0.402          | 0.098        | 0.023          | 0.033        | 0.237          |
|            | Non-AD/ Mild AD/ Moderate to Severe AD | 0.113     | 0.033          | 0.035       | 0.366          | 0.098        | 0.092          | 0.049        | 0.376          |
|            | Egg IgE (IU/ml)                        | 0.565     | 0.594          | 0.691       | 0.168          | 0.827        | 0.164          | 0.578        | 0.399          |
|            | Milk IgE (IU/ml)                       | 0.513     | 0.736          | 0.642       | 0.541          | 0.711        | 0.273          | 0.678        | 0.505          |

**Table S9.** Comparison of gene families involved in butyrate metabolism among phenotypic groups at each age. Significantly different gene families were selected using the Dunn's post-hoc test and MaAsLin2 analysis. *P*-value was adjusted using the Benjamini–Hochberg method to calculate the *q* value (false discovery rate adjusted *p*-value). N: Non-AD, M: Mild AD, MS: Moderate to Severe AD.

| Gene family                                                                                                                      | 6 months            |                |                                                |                               |                             |            |
|----------------------------------------------------------------------------------------------------------------------------------|---------------------|----------------|------------------------------------------------|-------------------------------|-----------------------------|------------|
|                                                                                                                                  | Kruskal-Wallis test |                | Adjusted <i>P</i> value (Dunn's Post-hoc test) |                               |                             | Enrichment |
|                                                                                                                                  | R-squared           | <i>P</i> value | Non-AD vs. Mild                                | Non-AD vs. Moderate to Severe | Mild vs. Moderate to Severe |            |
| K00004: butB; (R R)-butanediol dehydrogenase / meso-butanediol dehydrogenase / diacetyl reductase [EC:1.1.1.4 1.1.1.- 1.1.1.303] | 2.5213              | 0.2835         | 0.2823                                         | 0.1996                        | 0.2619                      | N=M=MS     |
| K00019: bdh; 3-hydroxybutyrate dehydrogenase [EC:1.1.1.30]                                                                       | 0.2161              | 0.8976         | 0.5343                                         | 0.4291                        | 0.9933                      | N=M=MS     |
| K00074: paaH, hbd, fadB, mmgB; 3-hydroxybutyryl-CoA dehydrogenase [EC:1.1.1.157]                                                 | 0.3409              | 0.8433         | 0.8489                                         | 0.6014                        | 0.4316                      | M<N<MS     |
| K00100: bdhAB; butanol dehydrogenase [EC:1.1.1.-]                                                                                | 1.1183              | 0.5717         | 0.4488                                         | 0.4829                        | 0.3492                      | MS<M<N     |
| K00135: gabD; succinate-semialdehyde dehydrogenase / glutarate-semialdehyde dehydrogenase [EC:1.2.1.16 1.2.1.79 1.2.1.20]        | 1.2438              | 0.5369         | 0.2551                                         | 0.3630                        | 0.3986                      | M<N<MS     |
| K00169: porA; pyruvate ferredoxin oxidoreductase alpha subunit [EC:1.2.7.1]                                                      | 2.0440              | 0.3599         | 0.2372                                         | 0.3205                        | 0.3736                      | MS=M<N     |
| K00170: porB; pyruvate ferredoxin oxidoreductase beta subunit [EC:1.2.7.1]                                                       | 2.7399              | 0.2541         | 0.1745                                         | 0.2718                        | 0.3441                      | MS=M<N     |
| K00171: porD; pyruvate ferredoxin oxidoreductase delta subunit [EC:1.2.7.1]                                                      | 0.3109              | 0.8560         | 0.8674                                         | 0.4266                        | 0.5949                      | N=M=MS     |
| K00172: porC, porG; pyruvate ferredoxin oxidoreductase gamma subunit [EC:1.2.7.1]                                                | 1.2170              | 0.5442         | 0.2753                                         | 0.3516                        | 0.4616                      | N=M=MS     |
| K00174: korA, oorA, oforA; 2-oxoglutarate/2-oxoacid ferredoxin oxidoreductase subunit alpha [EC:1.2.7.3 1.2.7.11]                | 3.9628              | 0.1379         | 0.4984                                         | 0.0818                        | 0.0695                      | MS<N<M     |
| K00175: korB, oorB, oforB; 2-oxoglutarate/2-oxoacid ferredoxin oxidoreductase subunit beta [EC:1.2.7.3 1.2.7.11]                 | 2.5877              | 0.2742         | 0.1873                                         | 0.2502                        | 0.3707                      | MS<M<N     |
| K00209: fabV, ter; enoyl-[acyl-carrier protein] reductase / trans-2-enoyl-CoA reductase (NAD+) [EC:1.3.1.9 1.3.1.44]             | 0.0634              | 0.9688         | 1.0000                                         | 0.4842                        | 0.6568                      | N=M=MS     |
| K00239: sdhA, frdA; succinate dehydrogenase / fumarate reductase flavoprotein subunit [EC:1.3.5.1 1.3.5.4]                       | 0.2204              | 0.8957         | 1.0000                                         | 0.5434                        | 0.4959                      | MS<M<N     |
| K00240: sdhB, frdB; succinate dehydrogenase / fumarate reductase iron-sulfur subunit [EC:1.3.5.1 1.3.5.4]                        | 1.8623              | 0.3941         | 0.2088                                         | 0.3010                        | 0.3001                      | M<N<MS     |
| K00241: sdhC, frdC; succinate dehydrogenase / fumarate reductase cytochrome b subunit                                            | 3.1722              | 0.2047         | 0.4503                                         | 0.1382                        | 0.0880                      | MS<N<M     |
| K00242: sdhD, frdD; succinate dehydrogenase / fumarate reductase membrane anchor subunit                                         | 0.2289              | 0.8919         | 0.9487                                         | 0.4555                        | 0.5922                      | N<MS<M     |
| K00244: frdA; fumarate reductase flavoprotein subunit [EC:1.3.5.4]                                                               | 5.2919              | 0.0709         | 0.1279                                         | 0.0487                        | 0.2052                      | MS<M<N     |
| K00245: frdB; fumarate reductase iron-sulfur subunit [EC:1.3.5.4]                                                                | 4.3840              | 0.1117         | 0.3144                                         | 0.0489                        | 0.0718                      | MS<N<M     |
| K00246: frdC; fumarate reductase subunit C                                                                                       | 0.7918              | 0.6731         | 0.4288                                         | 0.3022                        | 0.5657                      | MS<N<M     |
| K00247: frdD; fumarate reductase subunit D                                                                                       | 0.0543              | 0.9732         | 0.4761                                         | 1.0000                        | 0.6560                      | M<N<MS     |
| K00248: bcd; butyryl-CoA dehydrogenase [EC:1.3.8.1]                                                                              | 4.0284              | 0.1334         | 0.2839                                         | 0.0672                        | 0.1410                      | MS=M<N     |
| K00626: atoB; acetyl-CoA C-acetyltransferase [EC:2.3.1.9]                                                                        | 0.2686              | 0.8743         | 0.4422                                         | 0.4932                        | 0.9280                      | MS<M<N     |
| K00634: ptb; phosphate butyryltransferase [EC:2.3.1.19]                                                                          | 2.6546              | 0.2652         | 0.2180                                         | 0.1780                        | 0.1561                      | MS<N<M     |
| K00656: pflD; formate C-acetyltransferase [EC:2.3.1.54]                                                                          | 0.8864              | 0.6420         | 0.4026                                         | 0.5964                        | 0.3943                      | MS<M<N     |
| K00823: puuE; 4-aminobutyrate aminotransferase [EC:2.6.1.19]                                                                     | 0.2169              | 0.8972         | 0.5726                                         | 0.3953                        | 0.9668                      | N<MS<M     |
| K00929: buk; butyrate kinase [EC:2.7.2.7]                                                                                        | 2.8737              | 0.2377         | 0.1569                                         | 0.2011                        | 0.3335                      | MS<M<N     |
| K01028: scoA; 3-oxoacid CoA-transferase subunit A [EC:2.8.3.5]                                                                   | 1.0773              | 0.5835         | 0.4647                                         | 0.4933                        | 0.2682                      | MS<M<N     |
| K01029: scoB; 3-oxoacid CoA-transferase subunit B [EC:2.8.3.5]                                                                   | 0.1290              | 0.9375         | 0.5998                                         | 0.4285                        | 1.0000                      | MS=N<M     |
| K01034: atoD; acetate CoA/acetoacetate CoA-transferase alpha subunit [EC:2.8.3.8 2.8.3.9]                                        | 1.0380              | 0.5951         | 0.2834                                         | 0.3953                        | 0.5491                      | N<MS<M     |
| K01035: atoA, but; acetate CoA/acetoacetate CoA-transferase beta subunit [EC:2.8.3.8 2.8.3.9]                                    | 1.4405              | 0.4866         | 0.3775                                         | 0.4809                        | 0.2700                      | N<MS<M     |
| K01039: gctA; glutaconate CoA-transferase subunit A [EC:2.8.3.12]                                                                | 3.0769              | 0.2147         | 0.1352                                         | 0.5000                        | 0.1474                      | N=M=MS     |
| K01040: gctB; glutaconate CoA-transferase subunit B [EC:2.8.3.12]                                                                | 0.8906              | 0.6406         | 0.4384                                         | 0.5213                        | 0.3619                      | N=M=MS     |
| K01575: alsD, budA, aldC; acetolactate decarboxylase [EC:4.1.1.15]                                                               | 2.0793              | 0.3536         | 0.2188                                         | 0.2487                        | 0.2441                      | M<N<MS     |
| K01580: gadB, gadA; glutamate decarboxylase [EC:4.1.1.15]                                                                        | 3.4533              | 0.1779         | 0.0990                                         | 0.2305                        | 0.3368                      | M<MS<N     |
| K01615: gcdA; glutaconyl-CoA decarboxylase subunit alpha [EC:7.2.4.5]                                                            | 6.6734              | 0.0356         | 0.4398                                         | 0.0171                        | 0.0272                      | MS<M<N     |
| K01640: hmgL; hydroxymethylglutaryl-CoA lyase [EC:4.1.3.4]                                                                       | 0.8660              | 0.6486         | 0.3771                                         | 0.3260                        | 0.5486                      | N=M=MS     |





| Gene family                                                                                                                      | Kruskal-Wallis test |                | Adjusted <i>P</i> value (Dunn's Post-hoc test) |                    |                    | Enrichment |
|----------------------------------------------------------------------------------------------------------------------------------|---------------------|----------------|------------------------------------------------|--------------------|--------------------|------------|
|                                                                                                                                  | R-squared           | <i>P</i> value | Non-AD vs.                                     | Non-AD vs.         | Mild vs.           |            |
|                                                                                                                                  |                     |                | Mild                                           | Moderate to Severe | Moderate to Severe |            |
| K00004: butB; (R R)-butanediol dehydrogenase / meso-butanediol dehydrogenase / diacetyl reductase [EC:1.1.1.4 1.1.1.- 1.1.1.303] | 0.7095              | 0.7013         | 0.3285                                         | 0.6265             | 0.4988             | N=M=MS     |
| K00019: bdh; 3-hydroxybutyrate dehydrogenase [EC:1.1.1.30]                                                                       | 2.7594              | 0.2517         | 0.1500                                         | 0.1152             | 0.3319             | N=M=MS     |
| K00074: paaH, hbd, fadB, mmgB; 3-hydroxybutyryl-CoA dehydrogenase [EC:1.1.1.157]                                                 | 3.8383              | 0.1467         | 0.2757                                         | 0.3608             | 0.0767             | M<N<MS     |
| K00100: bdhAB; butanol dehydrogenase [EC:1.1.1.-]                                                                                | 0.2808              | 0.8690         | 0.4466                                         | 0.6215             | 0.9003             | M<MS<N     |
| K00135: gabD; succinate-semialdehyde dehydrogenase / glutarate-semialdehyde dehydrogenase [EC:1.2.1.16 1.2.1.79 1.2.1.20]        | 2.5321              | 0.2819         | 0.1125                                         | 0.1829             | 0.4774             | N<MS<M     |
| K00169: porA; pyruvate ferredoxin oxidoreductase alpha subunit [EC:1.2.7.1]                                                      | 2.8178              | 0.2444         | 0.1858                                         | 0.4448             | 0.1733             | M<N<MS     |
| K00170: porB; pyruvate ferredoxin oxidoreductase beta subunit [EC:1.2.7.1]                                                       | 2.3049              | 0.3159         | 0.3300                                         | 0.4280             | 0.1970             | MS<N<M     |
| K00171: porD; pyruvate ferredoxin oxidoreductase delta subunit [EC:1.2.7.1]                                                      | 0.9501              | 0.6219         | 0.4357                                         | 0.4710             | 0.5088             | MS=M<N     |
| K00172: porC, porG; pyruvate ferredoxin oxidoreductase gamma subunit [EC:1.2.7.1]                                                | 3.8220              | 0.1479         | 0.1157                                         | 0.1963             | 0.1076             | M<MS<N     |
| K00174: korA, oorA, oforA; 2-oxoglutarate/2-oxoacid ferredoxin oxidoreductase subunit alpha [EC:1.2.7.3 1.2.7.11]                | 0.4217              | 0.8099         | 0.4513                                         | 0.5708             | 0.7886             | MS<M<N     |
| K00175: korB, oorB, oforB; 2-oxoglutarate/2-oxoacid ferredoxin oxidoreductase subunit beta [EC:1.2.7.3 1.2.7.11]                 | 0.4307              | 0.8063         | 0.4123                                         | 0.7877             | 0.4948             | M<MS<N     |
| K00209: fabV, ter; enoyl-[acyl-carrier protein] reductase / trans-2-enoyl-CoA reductase (NAD+) [EC:1.3.1.9 1.3.1.44]             | 2.3908              | 0.3026         | 0.4475                                         | 0.3095             | 0.1839             | M<N<MS     |
| K00239: sdhA, frdA; succinate dehydrogenase / fumarate reductase flavoprotein subunit [EC:1.3.5.1 1.3.5.4]                       | 1.4027              | 0.4959         | 0.2764                                         | 0.4136             | 0.4321             | N<MS<M     |
| K00240: sdhB, frdB; succinate dehydrogenase / fumarate reductase iron-sulfur subunit [EC:1.3.5.1 1.3.5.4]                        | 0.4866              | 0.7841         | 0.5478                                         | 0.4557             | 0.7323             | N<MS<M     |
| K00241: sdhC, frdC; succinate dehydrogenase / fumarate reductase cytochrome b subunit                                            | 0.6008              | 0.7405         | 0.4525                                         | 0.6661             | 0.3728             | M<MS<N     |
| K00242: sdhD, frdD; succinate dehydrogenase / fumarate reductase membrane anchor subunit                                         | 3.5456              | 0.1699         | 0.0908                                         | 0.1283             | 0.1902             | N<MS<M     |
| K00244: frdA; fumarate reductase flavoprotein subunit [EC:1.3.5.4]                                                               | 5.7107              | 0.0575         | 0.0479                                         | 0.1554             | 0.0525             | M<MS<N     |
| K00245: frdB; fumarate reductase iron-sulfur subunit [EC:1.3.5.4]                                                                | 3.0361              | 0.2191         | 0.1083                                         | 0.1244             | 0.3818             | N<MS<M     |
| K00246: frdC; fumarate reductase subunit C                                                                                       | 2.9950              | 0.2237         | 0.0835                                         | 0.1436             | 0.4989             | N<MS<M     |
| K00247: frdD; fumarate reductase subunit D                                                                                       | 3.4712              | 0.1763         | 0.0876                                         | 0.0959             | 0.3792             | N<MS<M     |
| K00248: bcd; butyryl-CoA dehydrogenase [EC:1.3.8.1]                                                                              | 2.5381              | 0.2811         | 0.1710                                         | 0.2014             | 0.2100             | M<MS<N     |
| K00626: atoB; acetyl-CoA C-acetyltransferase [EC:2.3.1.9]                                                                        | 1.4829              | 0.4764         | 0.4043                                         | 0.4324             | 0.3496             | M<N<MS     |
| K00634: ptb; phosphate butyryltransferase [EC:2.3.1.19]                                                                          | 0.4023              | 0.8178         | 0.8580                                         | 0.3973             | 0.4697             | M<MS<N     |
| K00656: pfID; formate C-acetyltransferase [EC:2.3.1.54]                                                                          | 2.9066              | 0.2338         | 0.2359                                         | 0.1894             | 0.1914             | M<N<MS     |
| K00823: puuE; 4-aminobutyrate aminotransferase [EC:2.6.1.19]                                                                     | 2.4398              | 0.2953         | 0.2098                                         | 0.2030             | 0.2203             | N<MS<M     |
| K00929: buk; butyrate kinase [EC:2.7.2.7]                                                                                        | 3.0703              | 0.2154         | 0.1375                                         | 0.0802             | 0.4102             | M<MS<N     |
| K01028: scoA; 3-oxoacid CoA-transferase subunit A [EC:2.8.3.5]                                                                   | 1.0199              | 0.6005         | 0.4527                                         | 0.3535             | 0.5722             | N=M=MS     |
| K01029: scoB; 3-oxoacid CoA-transferase subunit B [EC:2.8.3.5]                                                                   | 0.0650              | 0.9680         | 0.4960                                         | 0.6595             | 1.0000             | N=M=MS     |
| K01034: atoD; acetate CoA/acetoacetate CoA-transferase alpha subunit [EC:2.8.3.8 2.8.3.9]                                        | 1.5933              | 0.4508         | 0.4389                                         | 0.3797             | 0.3381             | M<N<MS     |
| K01035: atoA, but; acetate CoA/acetoacetate CoA-transferase beta subunit [EC:2.8.3.8 2.8.3.9]                                    | 1.7696              | 0.4128         | 0.3689                                         | 0.4392             | 0.2826             | N<M<MS     |
| K01039: gctA; glutaconate CoA-transferase subunit A [EC:2.8.3.12]                                                                | 0.1512              | 0.9272         | 1.0000                                         | 0.4244             | 0.5875             | N=M=MS     |
| K01040: gctB; glutaconate CoA-transferase subunit B [EC:2.8.3.12]                                                                | 0.4322              | 0.8057         | 0.5748                                         | 0.4460             | 0.7677             | N<MS<M     |
| K01575: alsD, budA, aldC; acetolactate decarboxylase [EC:4.1.1.5]                                                                | 0.9098              | 0.6345         | 0.4409                                         | 0.3601             | 0.6289             | N<MS<M     |
| K01580: gadB, gadA; glutamate decarboxylase [EC:4.1.1.15]                                                                        | 5.7675              | 0.0559         | 0.0192                                         | 0.0325             | 0.4756             | M<MS<N     |
| K01615: gcdA; glutaconyl-CoA decarboxylase subunit alpha [EC:7.2.4.5]                                                            | 0.7932              | 0.6726         | 0.3115                                         | 0.5843             | 0.4958             | N<MS<M     |
| K01640: hmgL; hydroxymethylglutaryl-CoA lyase [EC:4.1.3.4]                                                                       | 5.3306              | 0.0696         | 0.0425                                         | 0.0320             | 0.3272             | MS=M<N     |
| K01641: hydroxymethylglutaryl-CoA synthase [EC:2.3.3.10]                                                                         | 0.0086              | 0.9957         | 0.4976                                         | 0.7181             | 1.0000             | M<MS<N     |
| K01652: ilvB, ilvG, ilvI; acetolactate synthase I/II/III large subunit [EC:2.2.1.6]                                              | 1.5614              | 0.4581         | 0.4643                                         | 0.3705             | 0.3172             | M<N<MS     |
| K01653: ilvH, ilvN; acetolactate synthase I/III small subunit [EC:2.2.1.6]                                                       | 6.3961              | 0.0408         | 0.1532                                         | 0.3520             | 0.0181             | M<N<MS     |
| K01692: paaF, echA; enoyl-CoA hydratase [EC:4.2.1.17]                                                                            | 0.4496              | 0.7987         | 0.5174                                         | 0.4895             | 0.7713             | N=M=MS     |

|                                                                                                                                                                   |                     |         |                                         |                               |                             |            |
|-------------------------------------------------------------------------------------------------------------------------------------------------------------------|---------------------|---------|-----------------------------------------|-------------------------------|-----------------------------|------------|
| K01715: crt; enoyl-CoA hydratase [EC:4.2.1.17]                                                                                                                    | 3.2407              | 0.1978  | 0.3173                                  | 0.3501                        | 0.1084                      | M<N<MS     |
| K01782: fadJ; 3-hydroxyacyl-CoA dehydrogenase / enoyl-CoA hydratase / 3-hydroxybutyryl-CoA epimerase [EC:1.1.1.35 4.2.1.17 5.1.2.3]                               | 2.2434              | 0.3257  | 0.2676                                  | 0.2620                        | 0.1926                      | MS=N<M     |
| K01825: fadB; 3-hydroxyacyl-CoA dehydrogenase / enoyl-CoA hydratase / 3-hydroxybutyryl-CoA epimerase / enoyl-CoA isomerase [EC:1.1.1.35 4.2.1.17 5.1.2.3 5.3.3.8] | 3.0256              | 0.2203  | 0.1497                                  | 0.1759                        | 0.1831                      | N=M=MS     |
| K03366: butA, budC; meso-butanediol dehydrogenase / (S S)-butanediol dehydrogenase / diacetyl reductase [EC:1.1.1.- 1.1.1.76 1.1.1.304]                           | 6.8778              | 0.0321  | 0.2368                                  | 0.0487                        | 0.0312                      | N<M<MS     |
| K03737: por, nifJ; pyruvate-ferredoxin/ferredoxin oxidoreductase [EC:1.2.7.1 1.2.7.-]                                                                             | 1.2001              | 0.5488  | 0.4103                                  | 0.3043                        | 0.3216                      | MS<M<N     |
| K04072: adhE; acetaldehyde dehydrogenase / alcohol dehydrogenase [EC:1.2.1.10 1.1.1.1]                                                                            | 3.5991              | 0.1654  | 0.1986                                  | 0.4634                        | 0.0965                      | M<N<MS     |
| K04073: mhpF; acetaldehyde dehydrogenase [EC:1.2.1.10]                                                                                                            | 1.2349              | 0.5393  | 0.4146                                  | 0.3591                        | 0.2630                      | N<MS<M     |
| K07246: ttuC, dmlA; tartrate dehydrogenase/decarboxylase / D-malate dehydrogenase [EC:1.1.1.93 4.1.1.73 1.1.1.83]                                                 | 4.7787              | 0.0917  | 0.0623                                  | 0.3025                        | 0.0849                      | MS<N<M     |
| K07250: gabT; 4-aminobutyrate aminotransferase / (S)-3-amino-2-methylpropionate transaminase / 5-aminovalerate transaminase [EC:2.6.1.19 2.6.1.22 2.6.1.48]       | 1.8292              | 0.4007  | 0.2680                                  | 0.3249                        | 0.2915                      | N<M<MS     |
| K08318: yihU; 4-hydroxybutyrate dehydrogenase / sulfolactaldehyde 3-reductase [EC:1.1.1.61 1.1.1.373]                                                             | 2.6052              | 0.2718  | 0.1687                                  | 0.1165                        | 0.3616                      | N<MS<M     |
| K08324: sad; succinate-semialdehyde dehydrogenase [EC:1.2.1.16 1.2.1.24]                                                                                          | 4.3709              | 0.1124  | 0.1688                                  | 0.0840                        | 0.1375                      | N<M<MS     |
| K11258: ilvM; acetolactate synthase II small subunit [EC:2.2.1.6]                                                                                                 | 4.9226              | 0.0853  | 0.0596                                  | 0.1399                        | 0.0864                      | N<MS<M     |
| K14534: abfD; 4-hydroxybutyryl-CoA dehydratase / vinylacetyl-CoA-Delta-isomerase [EC:4.2.1.120 5.3.3.3]                                                           | 20.9982             | 0.0000  | 0.0002                                  | 0.0000                        | 0.1484                      | MS=M<N     |
| K17829: ccrA; crotonyl-CoA reductase [EC:1.3.1.86]                                                                                                                | 1.8750              | 0.3916  | 0.2933                                  | 0.5000                        | 0.2809                      | N=M=MS     |
| K17865: croR; 3-hydroxybutyryl-CoA dehydratase [EC:4.2.1.55]                                                                                                      | 7.3636              | 0.0252  | 0.0095                                  | 0.0134                        | 0.5000                      | N=M=MS     |
| K18118: aarC, cat1; succinyl-CoA:acetate CoA-transferase [EC:2.8.3.18]                                                                                            | 0.1771              | 0.9153  | 0.5865                                  | 1.0000                        | 0.4276                      | M<N<MS     |
| K18120: 4hbD, abfH; 4-hydroxybutyrate dehydrogenase [EC:1.1.1.61]                                                                                                 | 0.6741              | 0.7139  | 0.7210                                  | 0.3873                        | 0.3800                      | N=M=MS     |
| K18122: cat2, abfT; 4-hydroxybutyrate CoA-transferase [EC:2.8.3.-]                                                                                                | 4.9872              | 0.0826  | 0.4556                                  | 0.1034                        | 0.0672                      | N=M=MS     |
|                                                                                                                                                                   | 25-36 months        |         |                                         |                               |                             |            |
|                                                                                                                                                                   |                     |         | Adjusted P value (Dunn's Post-hoc test) |                               |                             |            |
| Gene family                                                                                                                                                       | Kruskal-Wallis test |         | Non-AD vs. Mild                         | Non-AD vs. Moderate to Severe | Mild vs. Moderate to Severe | Enrichment |
|                                                                                                                                                                   | R-squared           | P value |                                         |                               |                             |            |
| K00004: butB; (R R)-butanediol dehydrogenase / meso-butanediol dehydrogenase / diacetyl reductase [EC:1.1.1.4 1.1.1.- 1.1.1.303]                                  | 1.6049              | 0.4482  | 0.2259                                  | 0.3215                        | 0.3227                      | N=M=MS     |
| K00019: bdh; 3-hydroxybutyrate dehydrogenase [EC:1.1.1.30]                                                                                                        | 0.1384              | 0.9331  | 1.0000                                  | 0.4749                        | 0.5737                      | N=M=MS     |
| K00074: paaH, hbd, fadB, mmgB; 3-hydroxybutyryl-CoA dehydrogenase [EC:1.1.1.157]                                                                                  | 0.9441              | 0.6237  | 0.5939                                  | 0.3748                        | 0.3744                      | N<MS<M     |
| K00100: bdhAB; butanol dehydrogenase [EC:1.1.1.-]                                                                                                                 | 1.3380              | 0.5122  | 0.2254                                  | 0.4079                        | 0.3963                      | M<MS<N     |
| K00135: gabD; succinate-semialdehyde dehydrogenase / glutarate-semialdehyde dehydrogenase [EC:1.2.1.16 1.2.1.79 1.2.1.20]                                         | 1.6196              | 0.4449  | 0.2529                                  | 0.2852                        | 0.3348                      | MS<N<M     |
| K00169: porA; pyruvate ferredoxin oxidoreductase alpha subunit [EC:1.2.7.1]                                                                                       | 8.0314              | 0.0180  | 0.4363                                  | 0.0083                        | 0.0588                      | MS<N<M     |
| K00170: porB; pyruvate ferredoxin oxidoreductase beta subunit [EC:1.2.7.1]                                                                                        | 12.5514             | 0.0019  | 0.0131                                  | 0.0268                        | 0.0006                      | MS<N<M     |
| K00171: porD; pyruvate ferredoxin oxidoreductase delta subunit [EC:1.2.7.1]                                                                                       | 5.8089              | 0.0548  | 0.3515                                  | 0.0247                        | 0.1461                      | MS<N<N     |
| K00172: porC, porG; pyruvate ferredoxin oxidoreductase gamma subunit [EC:1.2.7.1]                                                                                 | 5.0826              | 0.0788  | 0.2447                                  | 0.0365                        | 0.2723                      | MS<N<M     |
| K00174: korA, oorA, oforA; 2-oxoglutarate/2-oxoacid ferredoxin oxidoreductase subunit alpha [EC:1.2.7.3 1.2.7.11]                                                 | 8.6554              | 0.0132  | 0.0092                                  | 0.1978                        | 0.0056                      | M<N<MS     |
| K00175: korB, oorB, oforB; 2-oxoglutarate/2-oxoacid ferredoxin oxidoreductase subunit beta [EC:1.2.7.3 1.2.7.11]                                                  | 5.8264              | 0.0543  | 0.0240                                  | 0.2203                        | 0.0675                      | M<MS<N     |
| K00209: fabV, ter; enoyl-[acyl-carrier protein] reductase / trans-2-enoyl-CoA reductase (NAD+) [EC:1.3.1.9 1.3.1.44]                                              | 1.3247              | 0.5156  | 0.4447                                  | 0.3925                        | 0.3906                      | M<MS<N     |
| K00239: sdhA, frdA; succinate dehydrogenase / fumarate reductase flavoprotein subunit [EC:1.3.5.1 1.3.5.4]                                                        | 2.1254              | 0.3455  | 0.4238                                  | 0.2238                        | 0.3227                      | N<M<MS     |
| K00240: sdhB, frdB; succinate dehydrogenase / fumarate reductase iron-sulfur subunit [EC:1.3.5.1 1.3.5.4]                                                         | 2.8402              | 0.2417  | 0.2620                                  | 0.1342                        | 0.1955                      | M<N<MS     |
| K00241: sdhC, frdC; succinate dehydrogenase / fumarate reductase cytochrome b subunit                                                                             | 3.8380              | 0.1468  | 0.0884                                  | 0.4931                        | 0.0592                      | M<MS<N     |
| K00242: sdhD, frdD; succinate dehydrogenase / fumarate reductase membrane anchor subunit                                                                          | 0.5478              | 0.7604  | 0.7314                                  | 0.4721                        | 0.3679                      | MS=N<M     |
| K00244: frdA; fumarate reductase flavoprotein subunit [EC:1.3.5.4]                                                                                                | 1.7636              | 0.4140  | 0.2869                                  | 0.4573                        | 0.1927                      | N<MS<M     |
| K00245: frdB; fumarate reductase iron-sulfur subunit [EC:1.3.5.4]                                                                                                 | 0.7520              | 0.6866  | 0.3463                                  | 0.3996                        | 0.5890                      | MS<N<M     |
| K00246: frdC; fumarate reductase subunit C                                                                                                                        | 0.2681              | 0.8745  | 0.6252                                  | 0.9137                        | 0.4375                      | M<MS<N     |
| K00247: frdD; fumarate reductase subunit D                                                                                                                        | 0.4960              | 0.7803  | 0.7618                                  | 0.5157                        | 0.3687                      | MS<N<M     |
| K00248: bcd; butyryl-CoA dehydrogenase [EC:1.3.8.1]                                                                                                               | 0.0064              | 0.9968  | 0.7205                                  | 0.4806                        | 1.0000                      | M<MS<N     |

|                                                                                                                                                                   |         |        |        |        |        |        |
|-------------------------------------------------------------------------------------------------------------------------------------------------------------------|---------|--------|--------|--------|--------|--------|
| K00626: atoB; acetyl-CoA C-acetyltransferase [EC:2.3.1.9]                                                                                                         | 0.6641  | 0.7174 | 0.4708 | 0.6328 | 0.4710 | M<N<MS |
| K00634: ptb; phosphate butyryltransferase [EC:2.3.1.19]                                                                                                           | 11.8757 | 0.0026 | 0.0009 | 0.2768 | 0.0043 | M<N<MS |
| K00656: pfID; formate C-acetyltransferase [EC:2.3.1.54]                                                                                                           | 5.0451  | 0.0803 | 0.0852 | 0.0759 | 0.2634 | N<MS<M |
| K00823: puuE; 4-aminobutyrate aminotransferase [EC:2.6.1.19]                                                                                                      | 3.6971  | 0.1575 | 0.1319 | 0.1654 | 0.0912 | MS<N<M |
| K00929: buk; butyrate kinase [EC:2.7.2.7]                                                                                                                         | 8.0420  | 0.0179 | 0.0073 | 0.1484 | 0.0446 | M<MS<N |
| K01028: scoA; 3-oxoacid CoA-transferase subunit A [EC:2.8.3.5]                                                                                                    | 1.8468  | 0.3972 | 0.2365 | 0.3796 | 0.4436 | N=M=MS |
| K01029: scoB; 3-oxoacid CoA-transferase subunit B [EC:2.8.3.5]                                                                                                    | 0.4515  | 0.7979 | 0.7550 | 0.4545 | 0.4420 | N=M=MS |
| K01034: atoD; acetate CoA/acetoacetate CoA-transferase alpha subunit [EC:2.8.3.8 2.8.3.9]                                                                         | 0.5670  | 0.7532 | 0.3672 | 0.4555 | 0.7117 | MS<N<M |
| K01035: atoA, but; acetate CoA/acetoacetate CoA-transferase beta subunit [EC:2.8.3.8 2.8.3.9]                                                                     | 5.1569  | 0.0759 | 0.3534 | 0.0356 | 0.1705 | MS<M<N |
| K01039: gctA; glutaconate CoA-transferase subunit A [EC:2.8.3.12]                                                                                                 | 0.4073  | 0.8158 | 0.3527 | 0.5170 | 0.7988 | N=M=MS |
| K01040: gctB; glutaconate CoA-transferase subunit B [EC:2.8.3.12]                                                                                                 | 0.3609  | 0.8349 | 0.4626 | 0.4236 | 0.8279 | MS<N<M |
| K01575: alsD, budA, aldC; acetolactate decarboxylase [EC:4.1.1.5]                                                                                                 | 4.8994  | 0.0863 | 0.0513 | 0.4689 | 0.0333 | MS<N<M |
| K01580: gadB, gadA; glutamate decarboxylase [EC:4.1.1.15]                                                                                                         | 5.7059  | 0.0577 | 0.0354 | 0.1401 | 0.1183 | M<MS<N |
| K01615: godA; glutaconyl-CoA decarboxylase subunit alpha [EC:7.2.4.5]                                                                                             | 5.9183  | 0.0519 | 0.4395 | 0.0256 | 0.1003 | N<M<MS |
| K01640: hmgL; hydroxymethylglutaryl-CoA lyase [EC:4.1.3.4]                                                                                                        | 3.3884  | 0.1837 | 0.2742 | 0.0995 | 0.3593 | N<M<MS |
| K01641: hydroxymethylglutaryl-CoA synthase [EC:2.3.3.10]                                                                                                          | 5.2090  | 0.0739 | 0.4551 | 0.0384 | 0.1145 | MS<M<N |
| K01652: ilvB, ilvG, ilvI; acetolactate synthase I/II/III large subunit [EC:2.2.1.6]                                                                               | 0.2748  | 0.8716 | 1.0000 | 0.5169 | 0.4512 | N<MS<M |
| K01653: ilvH, ilvN; acetolactate synthase I/II small subunit [EC:2.2.1.6]                                                                                         | 1.0586  | 0.5890 | 0.4196 | 0.5343 | 0.3083 | MS<N<M |
| K01692: paaF, echA; enoyl-CoA hydratase [EC:4.2.1.17]                                                                                                             | 1.3849  | 0.5003 | 0.4134 | 0.3590 | 0.3015 | N=M=MS |
| K01715: ort; enoyl-CoA hydratase [EC:4.2.1.17]                                                                                                                    | 0.2830  | 0.8680 | 0.4960 | 0.9082 | 0.5470 | M<N<MS |
| K01782: fadJ; 3-hydroxyacyl-CoA dehydrogenase / enoyl-CoA hydratase / 3-hydroxybutyryl-CoA epimerase [EC:1.1.1.35 4.2.1.17 5.1.2.3]                               | 1.1957  | 0.5500 | 0.3713 | 0.4751 | 0.4769 | N=M=MS |
| K01825: fadB; 3-hydroxyacyl-CoA dehydrogenase / enoyl-CoA hydratase / 3-hydroxybutyryl-CoA epimerase / enoyl-CoA isomerase [EC:1.1.1.35 4.2.1.17 5.1.2.3 5.3.3.8] | 0.5438  | 0.7619 | 0.3383 | 0.4731 | 0.7112 | N=M=MS |
| K03366: butA, budC; meso-butanediol dehydrogenase / (S S)-butanediol dehydrogenase / diacetyl reductase [EC:1.1.1.- 1.1.1.76 1.1.1.304]                           | 4.1184  | 0.1276 | 0.2534 | 0.0693 | 0.1150 | MS<N<M |
| K03737: por, nifJ; pyruvate-ferredoxin/ferredoxin oxidoreductase [EC:1.2.7.1 1.2.7.-]                                                                             | 1.8348  | 0.3996 | 0.2853 | 0.3320 | 0.4878 | MS<N<M |
| K04072: adhE; acetaldehyde dehydrogenase / alcohol dehydrogenase [EC:1.2.1.10 1.1.1.1]                                                                            | 7.3661  | 0.0251 | 0.0167 | 0.0852 | 0.1044 | N<MS<M |
| K04073: mhpF; acetaldehyde dehydrogenase [EC:1.2.1.10]                                                                                                            | 0.1685  | 0.9192 | 0.4787 | 1.0000 | 0.5672 | MS<N<M |
| K07246: ttuC, dmlA; tartrate dehydrogenase/decarboxylase / D-malate dehydrogenase [EC:1.1.1.93 4.1.1.73 1.1.1.83]                                                 | 1.0899  | 0.5799 | 0.3880 | 0.4448 | 0.4869 | MS=M<N |
| K07250: gabT; 4-aminobutyrate aminotransferase / (S)-3-amino-2-methylpropionate transaminase / 5-aminovalerate transaminase [EC:2.6.1.19 2.6.1.22 2.6.1.48]       | 0.4739  | 0.7890 | 0.7809 | 0.5146 | 0.3761 | M<N<MS |
| K08318: yihU; 4-hydroxybutyrate dehydrogenase / sulfolactaldehyde 3-reductase [EC:1.1.1.61 1.1.1.373]                                                             | 1.8532  | 0.3959 | 0.4761 | 0.2910 | 0.2571 | N=M<MS |
| K08324: sad; succinate-semialdehyde dehydrogenase [EC:1.2.1.16 1.2.1.24]                                                                                          | 0.4503  | 0.7984 | 0.3793 | 0.4641 | 0.7970 | MS<N<M |
| K11258: ilvM; acetolactate synthase II small subunit [EC:2.2.1.6]                                                                                                 | 0.0899  | 0.9561 | 1.0000 | 0.4626 | 0.6241 | N=M=MS |
| K14534: abfD; 4-hydroxybutyryl-CoA dehydratase / vinylacetyl-CoA-Delta-isomerase [EC:4.2.1.120 5.3.3.3]                                                           | 3.4684  | 0.1765 | 0.2002 | 0.1254 | 0.4349 | N=M=MS |
| K17829: ccrA; crotonyl-CoA reductase [EC:1.3.1.86]                                                                                                                | 1.5432  | 0.4623 | 0.3068 | 0.4010 | 0.5000 | N=M=MS |
| K17865: croR; 3-hydroxybutyryl-CoA dehydratase [EC:4.2.1.55]                                                                                                      | 0.7636  | 0.6826 | 0.4211 | 0.6528 | 0.5000 | N=M=MS |
| K18118: aarC, cat1; succinyl-CoA:acetate CoA-transferase [EC:2.8.3.18]                                                                                            | 9.1675  | 0.0102 | 0.2611 | 0.0105 | 0.0109 | M<N<MS |
| K18120: 4hbD, abfH; 4-hydroxybutyrate dehydrogenase [EC:1.1.1.61]                                                                                                 | 0.9301  | 0.6281 | 0.6652 | 0.3342 | 0.4272 | N=M=MS |
| K18122: cat2, abfT; 4-hydroxybutyrate CoA-transferase [EC:2.8.3.-]                                                                                                | 4.5319  | 0.1037 | 0.0796 | 0.1313 | 0.1964 | N=M=MS |

| Gene family                                                                                                                      | MaAsLin2 analysis |                 |                               |
|----------------------------------------------------------------------------------------------------------------------------------|-------------------|-----------------|-------------------------------|
|                                                                                                                                  | Time point        | q value         |                               |
|                                                                                                                                  |                   | Non-AD vs. Mild | Non-AD vs. Moderate to Severe |
| K00004: butB; (R R)-butanediol dehydrogenase / meso-butanediol dehydrogenase / diacetyl reductase [EC:1.1.1.4 1.1.1.- 1.1.1.303] | N.S.*             | N.S.            | N.S.                          |
| K00019: bdh; 3-hydroxybutyrate dehydrogenase [EC:1.1.1.30]                                                                       | N.S.              | N.S.            | N.S.                          |

|                                                                                                                                                                   |              |        |        |
|-------------------------------------------------------------------------------------------------------------------------------------------------------------------|--------------|--------|--------|
| K00074: paaH, hbd, fadB, mmmB; 3-hydroxybutyryl-CoA dehydrogenase [EC:1.1.1.157]                                                                                  | N.S.         | N.S.   | N.S.   |
| K00100: bdhAB; butanol dehydrogenase [EC:1.1.1.-]                                                                                                                 | N.S.         | N.S.   | N.S.   |
| K00135: gabD; succinate-semialdehyde dehydrogenase / glutarate-semialdehyde dehydrogenase [EC:1.2.1.16 1.2.1.79 1.2.1.20]                                         | N.S.         | N.S.   | N.S.   |
| K00169: porA; pyruvate ferredoxin oxidoreductase alpha subunit [EC:1.2.7.1]                                                                                       | N.S.         | N.S.   | N.S.   |
| K00170: porB; pyruvate ferredoxin oxidoreductase beta subunit [EC:1.2.7.1]                                                                                        | 25-36 months | 0.0755 | N.S.   |
| K00171: porD; pyruvate ferredoxin oxidoreductase delta subunit [EC:1.2.7.1]                                                                                       | N.S.         | N.S.   | N.S.   |
| K00172: porC, porG; pyruvate ferredoxin oxidoreductase gamma subunit [EC:1.2.7.1]                                                                                 | N.S.         | N.S.   | N.S.   |
| K00174: korA, oorA, oforA; 2-oxoglutarate/2-oxoacid ferredoxin oxidoreductase subunit alpha [EC:1.2.7.3 1.2.7.11]                                                 | 25-36 months | 0.2128 | N.S.   |
| K00175: korB, oorB, oforB; 2-oxoglutarate/2-oxoacid ferredoxin oxidoreductase subunit beta [EC:1.2.7.3 1.2.7.11]                                                  | N.S.         | N.S.   | N.S.   |
| K00209: fabV, ter; enoyl-[acyl-carrier protein] reductase / trans-2-enoyl-CoA reductase (NAD+) [EC:1.3.1.9 1.3.1.44]                                              | N.S.         | N.S.   | N.S.   |
| K00239: sdhA, frdA; succinate dehydrogenase / fumarate reductase flavoprotein subunit [EC:1.3.5.1 1.3.5.4]                                                        | N.S.         | N.S.   | N.S.   |
| K00240: sdhB, frdB; succinate dehydrogenase / fumarate reductase iron-sulfur subunit [EC:1.3.5.1 1.3.5.4]                                                         | 7-12 months  | 0.2002 | N.S.   |
| K00241: sdhC, frdC; succinate dehydrogenase / fumarate reductase cytochrome b subunit                                                                             | N.S.         | N.S.   | N.S.   |
| K00242: sdhD, frdD; succinate dehydrogenase / fumarate reductase membrane anchor subunit                                                                          | N.S.         | N.S.   | N.S.   |
| K00244: frdA; fumarate reductase flavoprotein subunit [EC:1.3.5.4]                                                                                                | N.S.         | N.S.   | N.S.   |
| K00245: frdB; fumarate reductase iron-sulfur subunit [EC:1.3.5.4]                                                                                                 | N.S.         | N.S.   | N.S.   |
| K00246: frdC; fumarate reductase subunit C                                                                                                                        | N.S.         | N.S.   | N.S.   |
| K00247: frdD; fumarate reductase subunit D                                                                                                                        | N.S.         | N.S.   | N.S.   |
| K00248: bcd; butyryl-CoA dehydrogenase [EC:1.3.8.1]                                                                                                               | N.S.         | N.S.   | N.S.   |
| K00626: atoB; acetyl-CoA C-acetyltransferase [EC:2.3.1.9]                                                                                                         | N.S.         | N.S.   | N.S.   |
| K00634: ptb; phosphate butyryltransferase [EC:2.3.1.19]                                                                                                           | 25-36 months | 0.0400 | N.S.   |
| K00656: pflD; formate C-acetyltransferase [EC:2.3.1.54]                                                                                                           | N.S.         | N.S.   | N.S.   |
| K00823: puuE; 4-aminobutyrate aminotransferase [EC:2.6.1.19]                                                                                                      | N.S.         | N.S.   | N.S.   |
| K00929: buk; butyrate kinase [EC:2.7.2.7]                                                                                                                         | 25-36 months | 0.0898 | N.S.   |
| K01028: scoA; 3-oxoacid CoA-transferase subunit A [EC:2.8.3.5]                                                                                                    | N.S.         | N.S.   | N.S.   |
| K01029: scoB; 3-oxoacid CoA-transferase subunit B [EC:2.8.3.5]                                                                                                    | N.S.         | N.S.   | N.S.   |
| K01034: atoD; acetate CoA/acetoacetate CoA-transferase alpha subunit [EC:2.8.3.8 2.8.3.9]                                                                         | N.S.         | N.S.   | N.S.   |
| K01035: atoA, but; acetate CoA/acetoacetate CoA-transferase beta subunit [EC:2.8.3.8 2.8.3.9]                                                                     | N.S.         | N.S.   | N.S.   |
| K01039: gctA; glutaconate CoA-transferase subunit A [EC:2.8.3.12]                                                                                                 | N.S.         | N.S.   | N.S.   |
| K01040: gctB; glutaconate CoA-transferase subunit B [EC:2.8.3.12]                                                                                                 | N.S.         | N.S.   | N.S.   |
| K01575: alsD, budA, aldC; acetolactate decarboxylase [EC:4.1.1.5]                                                                                                 | N.S.         | N.S.   | N.S.   |
| K01580: gadB, gadA; glutamate decarboxylase [EC:4.1.1.15]                                                                                                         | 13-24 months | N.S.   | 0.2077 |
| K01615: gcdA; glutaconyl-CoA decarboxylase subunit alpha [EC:7.2.4.5]                                                                                             | N.S.         | N.S.   | N.S.   |
| K01640: hmgL; hydroxymethylglutaryl-CoA lyase [EC:4.1.3.4]                                                                                                        | N.S.         | N.S.   | N.S.   |
| K01641: hydroxymethylglutaryl-CoA synthase [EC:2.3.3.10]                                                                                                          | N.S.         | N.S.   | N.S.   |
| K01652: ilvB, ilvG, ilvI; acetolactate synthase I/II/III large subunit [EC:2.2.1.6]                                                                               | N.S.         | N.S.   | N.S.   |
| K01653: ilvH, ilvN; acetolactate synthase I/III small subunit [EC:2.2.1.6]                                                                                        | N.S.         | N.S.   | N.S.   |
| K01692: paaF, echA; enoyl-CoA hydratase [EC:4.2.1.17]                                                                                                             | N.S.         | N.S.   | N.S.   |
| K01715: crt; enoyl-CoA hydratase [EC:4.2.1.17]                                                                                                                    | N.S.         | N.S.   | N.S.   |
| K01782: fadJ; 3-hydroxyacyl-CoA dehydrogenase / enoyl-CoA hydratase / 3-hydroxybutyryl-CoA epimerase [EC:1.1.1.35 4.2.1.17 5.1.2.3]                               | N.S.         | N.S.   | N.S.   |
| K01825: fadB; 3-hydroxyacyl-CoA dehydrogenase / enoyl-CoA hydratase / 3-hydroxybutyryl-CoA epimerase / enoyl-CoA isomerase [EC:1.1.1.35 4.2.1.17 5.1.2.3 5.3.3.8] | N.S.         | N.S.   | N.S.   |
| K03366: butA, budC; meso-butanediol dehydrogenase / (S S)-butanediol dehydrogenase / diacetyl reductase [EC:1.1.1.- 1.1.1.76 1.1.1.304]                           | N.S.         | N.S.   | N.S.   |
| K03737: por, nifJ; pyruvate-ferredoxin/ferredoxin oxidoreductase [EC:1.2.7.1 1.2.7.-]                                                                             | N.S.         | N.S.   | N.S.   |
| K04072: adhE; acetaldehyde dehydrogenase / alcohol dehydrogenase [EC:1.2.1.10 1.1.1.1]                                                                            | 25-36 months | 0.2128 | N.S.   |



|                                                                                                                                                             |              |        |        |
|-------------------------------------------------------------------------------------------------------------------------------------------------------------|--------------|--------|--------|
| K04073: mhpF; acetaldehyde dehydrogenase [EC:1.2.1.10]                                                                                                      | N.S.         | N.S.   | N.S.   |
| K07246: ttuC, dmlA; tartrate dehydrogenase/decarboxylase / D-malate dehydrogenase [EC:1.1.1.93 4.1.1.73 1.1.1.83]                                           | N.S.         | N.S.   | N.S.   |
| K07250: gabT; 4-aminobutyrate aminotransferase / (S)-3-amino-2-methylpropionate transaminase / 5-aminovalerate transaminase [EC:2.6.1.19 2.6.1.22 2.6.1.48] | N.S.         | N.S.   | N.S.   |
| K08318: yihU; 4-hydroxybutyrate dehydrogenase / sulfolactaldehyde 3-reductase [EC:1.1.1.61 1.1.1.373]                                                       | N.S.         | N.S.   | N.S.   |
| K08324: sad; succinate-semialdehyde dehydrogenase [EC:1.2.1.16 1.2.1.24]                                                                                    | N.S.         | N.S.   | N.S.   |
| K11258: ilvM; acetolactate synthase II small subunit [EC:2.2.1.6]                                                                                           | N.S.         | N.S.   | N.S.   |
| K14534: abfD; 4-hydroxybutyryl-CoA dehydratase / vinylacetyl-CoA-Delta-isomerase [EC:4.2.1.120 5.3.3.3]                                                     | 13-24 months | 0.1001 | 0.0298 |
| K17829: ccrA; crotonyl-CoA reductase [EC:1.3.1.86]                                                                                                          | N.S.         | N.S.   | N.S.   |
| K17865: croR; 3-hydroxybutyryl-CoA dehydratase [EC:4.2.1.55]                                                                                                | N.S.         | N.S.   | N.S.   |
| K18118: aarC, cat1; succinyl-CoA:acetate CoA-transferase [EC:2.8.3.18]                                                                                      | N.S.         | N.S.   | N.S.   |
| K18120: 4hbD, abfH; 4-hydroxybutyrate dehydrogenase [EC:1.1.1.61]                                                                                           | N.S.         | N.S.   | N.S.   |
| K18122: cat2, abfT; 4-hydroxybutyrate CoA-transferase [EC:2.8.3.-]                                                                                          | N.S.         | N.S.   | N.S.   |

\*N.S., Not significant

**Table S10.** Comparison of gene families involved in propionate metabolism among phenotypic groups at each age. Significantly different gene families were selected using the Dunn's post-hoc test and MaAsLin2 analysis. *P*-value was adjusted using the Benjamini–Hochberg method to calculate the *q* value (false discovery rate adjusted *p*-value). N: Non-AD, M: Mild AD, MS: Moderate to Severe AD.

| Gene family                                                                                                                                                       | 6 months            |                |                                                |                               |                             | Enrichment |
|-------------------------------------------------------------------------------------------------------------------------------------------------------------------|---------------------|----------------|------------------------------------------------|-------------------------------|-----------------------------|------------|
|                                                                                                                                                                   | Kruskal-Wallis test |                | Adjusted <i>P</i> value (Dunn's Post-hoc test) |                               |                             |            |
|                                                                                                                                                                   | R-squared           | <i>P</i> value | Non-AD vs. Mild                                | Non-AD vs. Moderate to Severe | Mild vs. Moderate to Severe |            |
| K00005: gldA; glycerol dehydrogenase [EC:1.1.1.6]                                                                                                                 | 4.6003              | 0.1002         | 0.0969                                         | 0.0952                        | 0.3211                      | MS<M<N     |
| K00016: ldh; L-lactate dehydrogenase [EC:1.1.1.27]                                                                                                                | 1.8367              | 0.3992         | 0.2199                                         | 0.2856                        | 0.2635                      | M<N<MS     |
| K00048: fucO; lactaldehyde reductase [EC:1.1.1.77]                                                                                                                | 1.5149              | 0.4689         | 0.3305                                         | 0.2332                        | 0.3318                      | MS<N<M     |
| K00086: dhaT; 1 3-propanediol dehydrogenase [EC:1.1.1.202]                                                                                                        | 2.8061              | 0.2458         | 0.2232                                         | 0.1598                        | 0.1431                      | MS=M=N     |
| K00140: mmsA, iolA; malonate-semialdehyde dehydrogenase (acetylating) / methylmalonate-semialdehyde dehydrogenase [EC:1.2.1.18 1.2.1.27]                          | 0.8841              | 0.6427         | 0.4030                                         | 0.5974                        | 0.3945                      | MS=M=N     |
| K00166: bkdA1; 2-oxoisovalerate dehydrogenase E1 component alpha subunit [EC:1.2.4.4]                                                                             | 2.3086              | 0.3153         | 0.1833                                         | 0.2600                        | 0.2211                      | MS=N<M     |
| K00167: bkdA2; 2-oxoisovalerate dehydrogenase E1 component beta subunit [EC:1.2.4.4]                                                                              | 2.1058              | 0.3489         | 0.3203                                         | 0.2522                        | 0.2748                      | MS=M=N     |
| K00169: porA; pyruvate ferredoxin oxidoreductase alpha subunit [EC:1.2.7.1]                                                                                       | 2.0440              | 0.3599         | 0.2372                                         | 0.3205                        | 0.3736                      | MS=M<N     |
| K00170: porB; pyruvate ferredoxin oxidoreductase beta subunit [EC:1.2.7.1]                                                                                        | 2.7399              | 0.2541         | 0.1745                                         | 0.2718                        | 0.3441                      | MS=M<N     |
| K00171: porD; pyruvate ferredoxin oxidoreductase delta subunit [EC:1.2.7.1]                                                                                       | 0.3109              | 0.8560         | 0.8674                                         | 0.4266                        | 0.5949                      | MS=M=N     |
| K00172: porC; porG; pyruvate ferredoxin oxidoreductase gamma subunit [EC:1.2.7.1]                                                                                 | 1.2170              | 0.5442         | 0.2753                                         | 0.3516                        | 0.4616                      | MS=M=N     |
| K00248: bcd; butyryl-CoA dehydrogenase [EC:1.3.8.1]                                                                                                               | 4.0284              | 0.1334         | 0.2839                                         | 0.0672                        | 0.1410                      | MS=M<N     |
| K00382: lpd, pdhD; dihydrolipoamide dehydrogenase [EC:1.8.1.4]                                                                                                    | 2.9130              | 0.2331         | 0.1103                                         | 0.3100                        | 0.1861                      | M<N<MS     |
| K00625: pta; phosphate acetyltransferase [EC:2.3.1.8]                                                                                                             | 1.5008              | 0.4722         | 0.3047                                         | 0.3409                        | 0.3796                      | MS<M<N     |
| K00626: atoB; acetyl-CoA C-acetyltransferase [EC:2.3.1.9]                                                                                                         | 0.2686              | 0.8743         | 0.4422                                         | 0.4932                        | 0.9280                      | MS<M<N     |
| K00656: pflD; formate C-acetyltransferase [EC:2.3.1.54]                                                                                                           | 0.8864              | 0.6420         | 0.4026                                         | 0.5964                        | 0.3943                      | MS<M<N     |
| K00823: puuE; 4-aminobutyrate aminotransferase [EC:2.6.1.19]                                                                                                      | 0.2169              | 0.8972         | 0.5726                                         | 0.3953                        | 0.9668                      | N<MS<M     |
| K00925: ackA; acetate kinase [EC:2.7.2.1]                                                                                                                         | 1.5105              | 0.4699         | 0.2821                                         | 0.2757                        | 0.3484                      | M<N<MS     |
| K00932: tdcD; propionate kinase [EC:2.7.2.15]                                                                                                                     | 0.3250              | 0.8500         | 0.9229                                         | 0.4481                        | 0.4645                      | MS<N<M     |
| K01026: pct; propionate CoA-transferase [EC:2.8.3.1]                                                                                                              | 0.3557              | 0.8371         | 0.8279                                         | 0.4227                        | 0.5829                      | MS=M=N     |
| K01034: atoD; acetate CoA/acetoacetate CoA-transferase alpha subunit [EC:2.8.3.8 2.8.3.9]                                                                         | 1.0380              | 0.5951         | 0.2834                                         | 0.3953                        | 0.5491                      | N<MS<M     |
| K01035: atoA; acetate CoA/acetoacetate CoA-transferase beta subunit [EC:2.8.3.8 2.8.3.9]                                                                          | 1.4405              | 0.4866         | 0.3775                                         | 0.4809                        | 0.2700                      | N<MS<M     |
| K01659: prpC; 2-methylcitrate synthase [EC:2.3.3.5]                                                                                                               | 6.3216              | 0.0424         | 0.0749                                         | 0.0789                        | 0.0180                      | MS<N<M     |
| K01682: acnB; aconitate hydratase 2 / 2-methylisocitrate dehydratase [EC:4.2.1.3 4.2.1.99]                                                                        | 0.4130              | 0.8134         | 0.4292                                         | 0.4365                        | 0.8062                      | MS<N<M     |
| K01692: paaF, echA; enoyl-CoA hydratase [EC:4.2.1.17]                                                                                                             | 3.0747              | 0.2149         | 0.1193                                         | 0.3165                        | 0.2686                      | MS=M<N     |
| K01699: pduC; propanediol dehydratase large subunit [EC:4.2.1.28]                                                                                                 | 1.8992              | 0.3869         | 0.2993                                         | 0.2017                        | 0.2550                      | MS<N<M     |
| K01720: prpD; 2-methylcitrate dehydratase [EC:4.2.1.79]                                                                                                           | 0.1356              | 0.9344         | 0.4277                                         | 0.5949                        | 1.0000                      | M<N<MS     |
| K01734: mgsA; methylglyoxal synthase [EC:4.2.3.3]                                                                                                                 | 4.7852              | 0.0914         | 0.1152                                         | 0.0733                        | 0.2634                      | MS<M<N     |
| K01782: fadJ; 3-hydroxyacyl-CoA dehydrogenase / enoyl-CoA hydratase / 3-hydroxybutyryl-CoA epimerase [EC:1.1.1.35 4.2.1.17 5.1.2.3]                               | 6.9865              | 0.0304         | 0.2001                                         | 0.0125                        | 0.0723                      | MS<M<N     |
| K01825: fadB; 3-hydroxyacyl-CoA dehydrogenase / enoyl-CoA hydratase / 3-hydroxybutyryl-CoA epimerase / enoyl-CoA isomerase [EC:1.1.1.35 4.2.1.17 5.1.2.3 5.3.3.8] | 3.2093              | 0.2010         | 0.1860                                         | 0.1576                        | 0.2964                      | MS=M=N     |
| K01847: MUT; methylmalonyl-CoA mutase [EC:5.4.99.2]                                                                                                               | 2.0668              | 0.3558         | 0.3250                                         | 0.2576                        | 0.2755                      | MS<M<N     |
| K01848: mcmA1; methylmalonyl-CoA mutase N-terminal domain [EC:5.4.99.2]                                                                                           | 4.1059              | 0.1284         | 0.2298                                         | 0.0770                        | 0.0701                      | MS<N<M     |
| K01849: mcmA2; methylmalonyl-CoA mutase C-terminal domain [EC:5.4.99.2]                                                                                           | 4.8687              | 0.0877         | 0.3481                                         | 0.0343                        | 0.0618                      | MS<N<M     |
| K01895: acs; acetyl-CoA synthetase [EC:6.2.1.1]                                                                                                                   | 0.1958              | 0.9067         | 0.5631                                         | 1.0000                        | 0.4644                      | MS<M<N     |
| K01902: sucD; succinyl-CoA synthetase alpha subunit [EC:6.2.1.5]                                                                                                  | 1.9872              | 0.3702         | 0.2489                                         | 0.4580                        | 0.2514                      | M<N<MS     |
| K01903: sucC; succinyl-CoA synthetase beta subunit [EC:6.2.1.5]                                                                                                   | 1.5151              | 0.4688         | 0.2448                                         | 0.3152                        | 0.3278                      | M<N<MS     |

|                                                                                                                                                             |        |        |        |        |        |        |
|-------------------------------------------------------------------------------------------------------------------------------------------------------------|--------|--------|--------|--------|--------|--------|
| K01905: acdA; acetate---CoA ligase (ADP-forming) subunit alpha [EC:6.2.1.13]                                                                                | 0.7097 | 0.7013 | 0.7159 | 0.4013 | 0.5000 | MS=M<N |
| K01908: prpE; propionyl-CoA synthetase [EC:6.2.1.17]                                                                                                        | 0.0566 | 0.9721 | 0.6458 | 0.4561 | 1.0000 | MS=M<N |
| K01961: accC; acetyl-CoA carboxylase biotin carboxylase subunit [EC:6.4.1.2 6.3.4.14]                                                                       | 0.7725 | 0.6796 | 0.4738 | 0.6099 | 0.3289 | MS<N<M |
| K01962: accA; acetyl-CoA carboxylase carboxyl transferase subunit alpha [EC:6.4.1.2 2.1.3.15]                                                               | 0.4854 | 0.7845 | 0.4693 | 0.3613 | 0.7433 | M<MS<N |
| K01963: accD; acetyl-CoA carboxylase carboxyl transferase subunit beta [EC:6.4.1.2 2.1.3.15]                                                                | 0.0093 | 0.9954 | 0.4930 | 0.6980 | 1.0000 | M<N<MS |
| K01966: pccB; propionyl-CoA carboxylase beta chain [EC:6.4.1.3 2.1.3.15]                                                                                    | 0.8831 | 0.6430 | 0.3440 | 0.5329 | 0.4622 | MS=M<N |
| K02160: accB, bccP; acetyl-CoA carboxylase biotin carboxyl carrier protein                                                                                  | 3.9561 | 0.1383 | 0.0741 | 0.3160 | 0.2133 | M<MS<N |
| K03417: prpB; methylisocitrate lyase [EC:4.1.3.30]                                                                                                          | 0.1146 | 0.9443 | 0.6410 | 1.0000 | 0.4436 | MS<N<M |
| K05606: epi; methylmalonyl-CoA/ethylmalonyl-CoA epimerase [EC:5.1.99.1]                                                                                     | 5.7247 | 0.0571 | 0.1593 | 0.0489 | 0.0267 | MS<N<M |
| K07250: gabT; 4-aminobutyrate aminotransferase / (S)-3-amino-2-methylpropionate transaminase / 5-aminovalerate transaminase [EC:2.6.1.19 2.6.1.22 2.6.1.48] | 2.0117 | 0.3657 | 0.3079 | 0.1869 | 0.2474 | MS<N<M |
| K08325: yqhD; NADP-dependent alcohol dehydrogenase [EC:1.1.-.-]                                                                                             | 2.9231 | 0.2319 | 0.4080 | 0.1724 | 0.0902 | MS<N<M |
| K09788: prpF; 2-methylaconitate isomerase [EC:5.3.3.-]                                                                                                      | 2.1721 | 0.3375 | 0.4836 | 0.2273 | 0.1666 | MS<M<N |
| K11263: bccA, pccA; acetyl-CoA/propionyl-CoA carboxylase biotin carboxylase biotin carboxyl carrier protein [EC:6.4.1.2 6.4.1.3 6.3.4.14]                   | 1.9471 | 0.3777 | 0.2561 | 0.2304 | 0.2463 | N<M<MS |
| K11264: scpB, mmcD; methylmalonyl-CoA decarboxylase [EC:4.1.1.-]                                                                                            | 0.1454 | 0.9299 | 0.4891 | 1.0000 | 0.5529 | M<N<MS |
| K11381: bkdA; 2-oxoisovalerate dehydrogenase E1 component [EC:1.2.4.4]                                                                                      | 0.7097 | 0.7013 | 0.7159 | 0.4013 | 0.5000 | MS=M<N |
| K13788: pta; phosphate acetyltransferase [EC:2.3.1.8]                                                                                                       | 1.0027 | 0.6057 | 0.4038 | 0.2859 | 0.5130 | N<MS<M |
| K13919: pduD; propanediol dehydratase medium subunit [EC:4.2.1.28]                                                                                          | 2.5147 | 0.2844 | 0.3021 | 0.1621 | 0.4576 | MS=M<N |
| K13920: pduE; propanediol dehydratase small subunit [EC:4.2.1.28]                                                                                           | 0.3587 | 0.8358 | 0.8249 | 0.4525 | 0.5440 | MS<M<N |
| K13921: pduQ; 1-propanol dehydrogenase                                                                                                                      | 3.7852 | 0.1507 | 0.1514 | 0.1207 | 0.2898 | MS=M<N |
| K13922: pduP; propionaldehyde dehydrogenase [EC:1.2.1.87]                                                                                                   | 0.6343 | 0.7282 | 0.3960 | 0.7910 | 0.4717 | MS=M<N |
| K13923: pduL; phosphate propanoyltransferase [EC:2.3.1.222]                                                                                                 | 0.2598 | 0.8782 | 0.9663 | 0.4644 | 0.5005 | MS<N<M |
| K15024: putative phosphotransacetylase [EC:2.3.1.8]                                                                                                         | 3.4563 | 0.1776 | 0.0989 | 0.2298 | 0.3376 | MS=M<N |
| K18369: adh2; alcohol dehydrogenase [EC:1.1.1.-]                                                                                                            | 0.0933 | 0.9544 | 0.6569 | 1.0000 | 0.4453 | N<MS<M |
| K18471: ydJG; methylglyoxal reductase [EC:1.1.1.-]                                                                                                          | 0.0892 | 0.9564 | 0.4700 | 0.5962 | 1.0000 | M<N<MS |

| Gene family                                                                                                                               | 7-12 months         |         |                                         |                               |                             | Enrichment |
|-------------------------------------------------------------------------------------------------------------------------------------------|---------------------|---------|-----------------------------------------|-------------------------------|-----------------------------|------------|
|                                                                                                                                           | Kruskal-Wallis test |         | Adjusted P value (Dunn's Post-hoc test) |                               |                             |            |
|                                                                                                                                           | R-squared           | P value | Non-AD vs. Mild                         | Non-AD vs. Moderate to Severe | Mild vs. Moderate to Severe |            |
| K00005: gldA; glycerol dehydrogenase [EC:1.1.1.6]                                                                                         | 0.6300              | 0.7298  | 0.4111                                  | 0.5460                        | 0.6415                      | N<MS<M     |
| K00016: ldh; L-lactate dehydrogenase [EC:1.1.1.27]                                                                                        | 6.1539              | 0.0461  | 0.1725                                  | 0.2814                        | 0.0220                      | MS<N<M     |
| K00048: fucO; lactaldehyde reductase [EC:1.1.1.77]                                                                                        | 7.3083              | 0.0259  | 0.3392                                  | 0.0262                        | 0.0245                      | MS<M<N     |
| K00086: dhaT; 1 3-propanediol dehydrogenase [EC:1.1.1.202]                                                                                | 0.0847              | 0.9585  | 0.6379                                  | 1.0000                        | 0.4402                      | N=M=MS     |
| K00140: mmsA, iolA; malonate-semialdehyde dehydrogenase (acetyllating) / methylmalonate-semialdehyde dehydrogenase [EC:1.2.1.18 1.2.1.27] | 5.5350              | 0.0628  | 0.3857                                  | 0.1302                        | 0.0317                      | N=M=MS     |
| K00166: bkdA1; 2-oxoisovalerate dehydrogenase E1 component alpha subunit [EC:1.2.4.4]                                                     | 0.4883              | 0.7834  | 0.7567                                  | 0.3620                        | 0.5125                      | N=M=MS     |
| K00167: bkdA2; 2-oxoisovalerate dehydrogenase E1 component beta subunit [EC:1.2.4.4]                                                      | 5.3488              | 0.0689  | 0.0346                                  | 0.1245                        | 0.1290                      | N=M=MS     |
| K00169: porA; pyruvate ferredoxin oxidoreductase alpha subunit [EC:1.2.7.1]                                                               | 4.9861              | 0.0827  | 0.2004                                  | 0.3126                        | 0.0428                      | N<MS<M     |
| K00170: porB; pyruvate ferredoxin oxidoreductase beta subunit [EC:1.2.7.1]                                                                | 3.7589              | 0.1527  | 0.3228                                  | 0.2699                        | 0.0804                      | MS<N<M     |
| K00171: porD; pyruvate ferredoxin oxidoreductase delta subunit [EC:1.2.7.1]                                                               | 1.3945              | 0.4980  | 0.3602                                  | 0.4654                        | 0.3566                      | N=M=MS     |
| K00172: porC porG; pyruvate ferredoxin oxidoreductase gamma subunit [EC:1.2.7.1]                                                          | 3.2819              | 0.1938  | 0.2648                                  | 0.1610                        | 0.1186                      | MS<M<N     |
| K00248: bcd; butyryl-CoA dehydrogenase [EC:1.3.8.1]                                                                                       | 8.1677              | 0.0168  | 0.3023                                  | 0.0975                        | 0.0070                      | MS<N<M     |
| K00382: lpd, pdhD; dihydrolipoamide dehydrogenase [EC:1.8.1.4]                                                                            | 5.0997              | 0.0781  | 0.1110                                  | 0.4594                        | 0.0531                      | MS<N<M     |
| K00625: pta; phosphate acetyltransferase [EC:2.3.1.8]                                                                                     | 2.4355              | 0.2959  | 0.3263                                  | 0.3743                        | 0.1782                      | MS<M<N     |

|                                                                                                                                                                   |         |        |        |        |        |        |
|-------------------------------------------------------------------------------------------------------------------------------------------------------------------|---------|--------|--------|--------|--------|--------|
| K00626: atoB; acetyl-CoA C-acetyltransferase [EC:2.3.1.9]                                                                                                         | 4.5623  | 0.1022 | 0.1472 | 0.0636 | 0.1142 | MS<M<N |
| K00656: pfID; formate C-acetyltransferase [EC:2.3.1.54]                                                                                                           | 10.3860 | 0.0056 | 0.4603 | 0.0185 | 0.0038 | MS<N<M |
| K00823: puuE; 4-aminobutyrate aminotransferase [EC:2.6.1.19]                                                                                                      | 3.0529  | 0.2173 | 0.1006 | 0.1302 | 0.3530 | M<MS<N |
| K00925: ackA; acetate kinase [EC:2.7.2.1]                                                                                                                         | 7.2531  | 0.0266 | 0.1888 | 0.2150 | 0.0106 | MS<M<N |
| K00932: tdcD; propionate kinase [EC:2.7.2.15]                                                                                                                     | 2.2818  | 0.3195 | 0.2108 | 0.1424 | 0.4387 | M<MS<N |
| K01026: pct; propionate CoA-transferase [EC:2.8.3.1]                                                                                                              | 1.2733  | 0.5291 | 0.3732 | 0.4011 | 0.2612 | N=M=MS |
| K01034: atoD; acetate CoA/acetoacetate CoA-transferase alpha subunit [EC:2.8.3.8 2.8.3.9]                                                                         | 0.5919  | 0.7438 | 0.5161 | 0.4417 | 0.6800 | M<N<MS |
| K01035: atoA; acetate CoA/acetoacetate CoA-transferase beta subunit [EC:2.8.3.8 2.8.3.9]                                                                          | 0.6280  | 0.7305 | 0.4729 | 0.4721 | 0.6617 | N<M<MS |
| K01659: prpC; 2-methylcitrate synthase [EC:2.3.3.5]                                                                                                               | 3.7254  | 0.1553 | 0.1465 | 0.4962 | 0.1155 | M<MS<N |
| K01682: acnB; aconitate hydratase 2 / 2-methylisocitrate dehydratase [EC:4.2.1.3 4.2.1.99]                                                                        | 0.2292  | 0.8917 | 0.4890 | 0.5719 | 0.9662 | MS<M<N |
| K01692: paaF, echA; enoyl-CoA hydratase [EC:4.2.1.17]                                                                                                             | 5.0314  | 0.0808 | 0.0373 | 0.0749 | 0.2337 | MS=M<N |
| K01699: pduC; propanediol dehydratase large subunit [EC:4.2.1.28]                                                                                                 | 0.6198  | 0.7335 | 0.3853 | 0.6543 | 0.4170 | N<MS<M |
| K01720: prpD; 2-methylcitrate dehydratase [EC:4.2.1.79]                                                                                                           | 3.8469  | 0.1461 | 0.3174 | 0.2687 | 0.0764 | M<N<MS |
| K01734: mgsA; methylglyoxal synthase [EC:4.2.3.3]                                                                                                                 | 0.4128  | 0.8135 | 0.4595 | 0.5431 | 0.7893 | M<N<MS |
| K01782: fadJ; 3-hydroxyacyl-CoA dehydrogenase / enoyl-CoA hydratase / 3-hydroxybutyryl-CoA epimerase [EC:1.1.1.35 4.2.1.17 5.1.2.3]                               | 4.4828  | 0.1063 | 0.0566 | 0.1557 | 0.1481 | M<MS<N |
| K01825: fadB; 3-hydroxyacyl-CoA dehydrogenase / enoyl-CoA hydratase / 3-hydroxybutyryl-CoA epimerase / enoyl-CoA isomerase [EC:1.1.1.35 4.2.1.17 5.1.2.3 5.3.3.8] | 4.6820  | 0.0962 | 0.0614 | 0.1515 | 0.1396 | N=M=MS |
| K01847: MUT; methylmalonyl-CoA mutase [EC:5.4.99.2]                                                                                                               | 0.7693  | 0.6807 | 0.4679 | 0.4488 | 0.5060 | MS<N<M |
| K01848: mcmA1; methylmalonyl-CoA mutase N-terminal domain [EC:5.4.99.2]                                                                                           | 0.8288  | 0.6607 | 0.4634 | 0.4402 | 0.5618 | M<N<MS |
| K01849: mcmA2; methylmalonyl-CoA mutase C-terminal domain [EC:5.4.99.2]                                                                                           | 2.7427  | 0.2538 | 0.1505 | 0.4071 | 0.2408 | N<MS<M |
| K01895: acs; acetyl-CoA synthetase [EC:6.2.1.1]                                                                                                                   | 1.9811  | 0.3714 | 0.2710 | 0.4804 | 0.2874 | N<MS<M |
| K01902: sucD; succinyl-CoA synthetase alpha subunit [EC:6.2.1.5]                                                                                                  | 1.0923  | 0.5792 | 0.3180 | 0.4459 | 0.5585 | MS<N<M |
| K01903: sucC; succinyl-CoA synthetase beta subunit [EC:6.2.1.5]                                                                                                   | 5.3376  | 0.0693 | 0.0880 | 0.4962 | 0.0525 | MS<N<M |
| K01905: acdA; acetate--CoA ligase (ADP-forming) subunit alpha [EC:6.2.1.13]                                                                                       | 4.1148  | 0.1278 | 0.0464 | 0.0837 | 0.4373 | N=M=MS |
| K01908: prpE; propionyl-CoA synthetase [EC:6.2.1.17]                                                                                                              | 0.3709  | 0.8307 | 0.4277 | 0.8553 | 0.4885 | MS=M<N |
| K01961: accC; acetyl-CoA carboxylase biotin carboxylase subunit [EC:6.4.1.2 6.3.4.14]                                                                             | 1.0708  | 0.5854 | 0.4545 | 0.3659 | 0.3370 | N<M<MS |
| K01962: accA; acetyl-CoA carboxylase carboxyl transferase subunit alpha [EC:6.4.1.2 2.1.3.15]                                                                     | 2.0975  | 0.3504 | 0.4313 | 0.2042 | 0.2860 | MS<M<N |
| K01963: accD; acetyl-CoA carboxylase carboxyl transferase subunit beta [EC:6.4.1.2 2.1.3.15]                                                                      | 2.2492  | 0.3248 | 0.4492 | 0.2706 | 0.2175 | MS<M<N |
| K01966: pccB; propionyl-CoA carboxylase beta chain [EC:6.4.1.3 2.1.3.15]                                                                                          | 1.7936  | 0.4079 | 0.2557 | 0.2712 | 0.2774 | N=M<MS |
| K02160: accB, bccP; acetyl-CoA carboxylase biotin carboxyl carrier protein                                                                                        | 1.9423  | 0.3786 | 0.4526 | 0.2291 | 0.3014 | N<MS<M |
| K03417: prpB; methylisocitrate lyase [EC:4.1.3.30]                                                                                                                | 1.6385  | 0.4408 | 0.4378 | 0.3866 | 0.2296 | M<N<MS |
| K05606: epi; methylmalonyl-CoA/ethylmalonyl-CoA epimerase [EC:5.1.99.1]                                                                                           | 0.2792  | 0.8697 | 0.4665 | 0.5789 | 0.9032 | MS<N<M |
| K07250: gabT; 4-aminobutyrate aminotransferase / (S)-3-amino-2-methylpropionate transaminase / 5-aminovalerate transaminase [EC:2.6.1.19 2.6.1.22 2.6.1.48]       | 3.0193  | 0.2210 | 0.3403 | 0.1118 | 0.2123 | N<M<MS |
| K08325: yqhD; NADP-dependent alcohol dehydrogenase [EC:1.1.-.-]                                                                                                   | 1.1316  | 0.5679 | 0.4397 | 0.3788 | 0.3129 | N<M<MS |
| K09788: prpF; 2-methylaconitate isomerase [EC:5.3.3.-]                                                                                                            | 6.9120  | 0.0316 | 0.0167 | 0.0147 | 0.4365 | N<M<MS |
| K11263: bccA, pccA; acetyl-CoA/propionyl-CoA carboxylase biotin carboxylase biotin carboxyl carrier protein [EC:6.4.1.2 6.4.1.3 6.3.4.14]                         | 5.0858  | 0.0786 | 0.1868 | 0.3238 | 0.0413 | MS<N<M |
| K11264: scpB, mmcD; methylmalonyl-CoA decarboxylase [EC:4.1.1.-]                                                                                                  | 9.1029  | 0.0106 | 0.0044 | 0.0084 | 0.3200 | MS<M<N |
| K11381: bkdA; 2-oxoisovalerate dehydrogenase E1 component [EC:1.2.4.4]                                                                                            | 0.9840  | 0.6114 | 0.2745 | 0.5188 | 0.4602 | N=M=MS |
| K13788: pta; phosphate acetyltransferase [EC:2.3.1.8]                                                                                                             | 3.8537  | 0.1456 | 0.2848 | 0.2974 | 0.0746 | MS<M<N |
| K13919: pduD; propanediol dehydratase medium subunit [EC:4.2.1.28]                                                                                                | 0.5262  | 0.7687 | 0.3456 | 0.7233 | 0.4898 | N=M=MS |
| K13920: pduE; propanediol dehydratase small subunit [EC:4.2.1.28]                                                                                                 | 0.0251  | 0.9875 | 0.7143 | 0.4781 | 1.0000 | MS<M<N |
| K13921: pduQ; 1-propanol dehydrogenase                                                                                                                            | 0.3053  | 0.8584 | 0.8714 | 0.5218 | 0.4214 | N=M=MS |
| K13922: pduP; propionaldehyde dehydrogenase [EC:1.2.1.87]                                                                                                         | 2.1073  | 0.3487 | 0.2215 | 0.1911 | 0.3589 | N=M=MS |
| K13923: pduL; phosphate propanoyltransferase [EC:2.3.1.222]                                                                                                       | 0.6541  | 0.7211 | 0.4522 | 0.4865 | 0.6778 | M<MS<N |
| K15024: putative phosphotransacetylase [EC:2.3.1.8]                                                                                                               | 0.7273  | 0.6951 | 0.4191 | 0.5125 | 0.5930 | N=M=MS |

|                                                                                                                                                                   |                     |         |                                         |                               |                             |            |
|-------------------------------------------------------------------------------------------------------------------------------------------------------------------|---------------------|---------|-----------------------------------------|-------------------------------|-----------------------------|------------|
| K18369: adh2; alcohol dehydrogenase [EC:1.1.1.-]                                                                                                                  | 1.5516              | 0.4603  | 0.4438                                  | 0.2607                        | 0.3885                      | MS<M<N     |
| K18471: ydjG; methylglyoxal reductase [EC:1.1.1.-]                                                                                                                | 5.4522              | 0.0655  | 0.0702                                  | 0.0294                        | 0.1566                      | MS<M<N     |
|                                                                                                                                                                   | 13-24 months        |         |                                         |                               |                             |            |
|                                                                                                                                                                   | Kruskal-Wallis test |         | Adjusted P value (Dunn's Post-hoc test) |                               |                             |            |
| Gene family                                                                                                                                                       | R-squared           | P value | Non-AD vs. Mild                         | Non-AD vs. Moderate to Severe | Mild vs. Moderate to Severe | Enrichment |
| K00005: gldA; glycerol dehydrogenase [EC:1.1.1.6]                                                                                                                 | 1.5690              | 0.4564  | 0.3277                                  | 0.3330                        | 0.2752                      | N<MS<M     |
| K00016: ldh; L-lactate dehydrogenase [EC:1.1.1.27]                                                                                                                | 3.9718              | 0.1373  | 0.1794                                  | 0.0814                        | 0.1549                      | N<M<MS     |
| K00048: fucO; lactaldehyde reductase [EC:1.1.1.77]                                                                                                                | 0.3856              | 0.8246  | 0.8025                                  | 0.4807                        | 0.3939                      | N<MS<M     |
| K00086: dhaT; 1,3-propanediol dehydrogenase [EC:1.1.1.202]                                                                                                        | 3.1514              | 0.2069  | 0.1396                                  | 0.3865                        | 0.1613                      | N=M=MS     |
| K00140: mmsA, iolA; malonate-semialdehyde dehydrogenase (acetylating) / methylmalonate-semialdehyde dehydrogenase [EC:1.2.1.18 1.2.1.27]                          | 2.9358              | 0.2304  | 0.3509                                  | 0.1341                        | 0.2492                      | N=M=MS     |
| K00166: bkdA1; 2-oxoisovalerate dehydrogenase E1 component alpha subunit [EC:1.2.4.4]                                                                             | 2.9240              | 0.2318  | 0.1469                                  | 0.3791                        | 0.1864                      | N=M=MS     |
| K00167: bkdA2; 2-oxoisovalerate dehydrogenase E1 component beta subunit [EC:1.2.4.4]                                                                              | 1.8886              | 0.3889  | 0.1543                                  | 0.2791                        | 0.4981                      | N=M=MS     |
| K00169: porA; pyruvate ferredoxin oxidoreductase alpha subunit [EC:1.2.7.1]                                                                                       | 2.8178              | 0.2444  | 0.1858                                  | 0.4448                        | 0.1733                      | M<N<MS     |
| K00170: porB; pyruvate ferredoxin oxidoreductase beta subunit [EC:1.2.7.1]                                                                                        | 2.3049              | 0.3159  | 0.3300                                  | 0.4280                        | 0.1970                      | MS<N<M     |
| K00171: porD; pyruvate ferredoxin oxidoreductase delta subunit [EC:1.2.7.1]                                                                                       | 0.9501              | 0.6219  | 0.4357                                  | 0.4710                        | 0.5088                      | MS=M<N     |
| K00172: porC; porG; pyruvate ferredoxin oxidoreductase gamma subunit [EC:1.2.7.1]                                                                                 | 3.8220              | 0.1479  | 0.1157                                  | 0.1963                        | 0.1076                      | M<MS<N     |
| K00248: bcd; butyryl-CoA dehydrogenase [EC:1.3.8.1]                                                                                                               | 2.5381              | 0.2811  | 0.1710                                  | 0.2014                        | 0.2100                      | M<MS<N     |
| K00382: lpd, pdhD; dihydrolipoamide dehydrogenase [EC:1.8.1.4]                                                                                                    | 0.3298              | 0.8480  | 0.9374                                  | 0.4237                        | 0.4791                      | M<MS<N     |
| K00625: pta; phosphate acetyltransferase [EC:2.3.1.8]                                                                                                             | 3.3342              | 0.1888  | 0.1856                                  | 0.2793                        | 0.0986                      | M<MS<N     |
| K00626: atoB; acetyl-CoA C-acetyltransferase [EC:2.3.1.9]                                                                                                         | 1.4829              | 0.4764  | 0.4043                                  | 0.4324                        | 0.3496                      | M<N<MS     |
| K00656: pfID; formate C-acetyltransferase [EC:2.3.1.54]                                                                                                           | 2.9066              | 0.2338  | 0.2359                                  | 0.1894                        | 0.1914                      | M<N<MS     |
| K00823: puuE; 4-aminobutyrate aminotransferase [EC:2.6.1.19]                                                                                                      | 2.4398              | 0.2953  | 0.2098                                  | 0.2030                        | 0.2203                      | N<MS<M     |
| K00925: ackA; acetate kinase [EC:2.7.2.1]                                                                                                                         | 1.8560              | 0.3954  | 0.4298                                  | 0.3678                        | 0.2598                      | M<MS<N     |
| K00932: tdcD; propionate kinase [EC:2.7.2.15]                                                                                                                     | 0.4738              | 0.7891  | 0.4508                                  | 0.7372                        | 0.4184                      | N=M=MS     |
| K01026: pct; propionate CoA-transferase [EC:2.8.3.1]                                                                                                              | 0.6958              | 0.7062  | 0.6067                                  | 0.3781                        | 0.3816                      | MS<N<M     |
| K01034: atoD; acetate CoA/acetoacetate CoA-transferase alpha subunit [EC:2.8.3.8 2.8.3.9]                                                                         | 1.5933              | 0.4508  | 0.4389                                  | 0.3797                        | 0.3381                      | M<N<MS     |
| K01035: atoA; acetate CoA/acetoacetate CoA-transferase beta subunit [EC:2.8.3.8 2.8.3.9]                                                                          | 1.7696              | 0.4128  | 0.3689                                  | 0.4392                        | 0.2826                      | N<M<MS     |
| K01659: prpC; 2-methylcitrate synthase [EC:2.3.3.5]                                                                                                               | 2.3860              | 0.3033  | 0.1840                                  | 0.1842                        | 0.3161                      | N<MS<M     |
| K01682: acnB; aconitate hydratase 2 / 2-methylisocitrate dehydratase [EC:4.2.1.3 4.2.1.99]                                                                        | 2.1906              | 0.3344  | 0.1404                                  | 0.2211                        | 0.4608                      | N=M=MS     |
| K01692: paaF, echA; enoyl-CoA hydratase [EC:4.2.1.17]                                                                                                             | 0.4496              | 0.7987  | 0.5174                                  | 0.4895                        | 0.7713                      | N=M=MS     |
| K01699: pduC; propanediol dehydratase large subunit [EC:4.2.1.28]                                                                                                 | 2.3347              | 0.3112  | 0.2031                                  | 0.1921                        | 0.2944                      | N<M<MS     |
| K01720: prpD; 2-methylcitrate dehydratase [EC:4.2.1.79]                                                                                                           | 4.0366              | 0.1329  | 0.0474                                  | 0.0809                        | 0.4890                      | N<MS<M     |
| K01734: mgsA; methylglyoxal synthase [EC:4.2.3.3]                                                                                                                 | 2.2759              | 0.3205  | 0.2292                                  | 0.2080                        | 0.2362                      | M<MS<N     |
| K01782: fadJ; 3-hydroxyacyl-CoA dehydrogenase / enoyl-CoA hydratase / 3-hydroxybutyryl-CoA epimerase [EC:1.1.1.35 4.2.1.17 5.1.2.3]                               | 2.2434              | 0.3257  | 0.2676                                  | 0.2620                        | 0.1926                      | MS=N<M     |
| K01825: fadB; 3-hydroxyacyl-CoA dehydrogenase / enoyl-CoA hydratase / 3-hydroxybutyryl-CoA epimerase / enoyl-CoA isomerase [EC:1.1.1.35 4.2.1.17 5.1.2.3 5.3.3.8] | 3.0256              | 0.2203  | 0.1497                                  | 0.1759                        | 0.1831                      | N=M=MS     |
| K01847: MUT; methylmalonyl-CoA mutase [EC:5.4.99.2]                                                                                                               | 10.6078             | 0.0050  | 0.0461                                  | 0.0033                        | 0.0430                      | MS<M<N     |
| K01848: mcmA1; methylmalonyl-CoA mutase N-terminal domain [EC:5.4.99.2]                                                                                           | 0.6608              | 0.7186  | 0.3363                                  | 0.6577                        | 0.4887                      | N<M<MS     |
| K01849: mcmA2; methylmalonyl-CoA mutase C-terminal domain [EC:5.4.99.2]                                                                                           | 0.3335              | 0.8464  | 0.8712                                  | 0.3727                        | 0.5321                      | N<M<MS     |
| K01895: acs; acetyl-CoA synthetase [EC:6.2.1.1]                                                                                                                   | 0.3872              | 0.8240  | 0.4881                                  | 0.8026                        | 0.4151                      | MS<M<N     |
| K01902: sucD; succinyl-CoA synthetase alpha subunit [EC:6.2.1.5]                                                                                                  | 2.9042              | 0.2341  | 0.3312                                  | 0.3670                        | 0.1376                      | M<N<MS     |
| K01903: sucC; succinyl-CoA synthetase beta subunit [EC:6.2.1.5]                                                                                                   | 0.9356              | 0.6264  | 0.4488                                  | 0.4628                        | 0.5270                      | M<MS<N     |
| K01905: acdA; acetate--CoA ligase (ADP-forming) subunit alpha [EC:6.2.1.13]                                                                                       | 1.8326              | 0.4000  | 0.2819                                  | 0.1659                        | 0.4093                      | N=M=MS     |

|                                                                                                                                                             |        |        |        |        |        |        |
|-------------------------------------------------------------------------------------------------------------------------------------------------------------|--------|--------|--------|--------|--------|--------|
| K01908: prpE; propionyl-CoA synthetase [EC:6.2.1.17]                                                                                                        | 2.3717 | 0.3055 | 0.1902 | 0.1412 | 0.3385 | N=M<MS |
| K01961: accC; acetyl-CoA carboxylase biotin carboxylase subunit [EC:6.4.1.2 6.3.4.14]                                                                       | 0.5028 | 0.7777 | 0.4862 | 0.5078 | 0.7593 | N<M<MS |
| K01962: accA; acetyl-CoA carboxylase carboxyl transferase subunit alpha [EC:6.4.1.2 2.1.3.15]                                                               | 6.2976 | 0.0429 | 0.0970 | 0.4721 | 0.0223 | M<N<MS |
| K01963: accD; acetyl-CoA carboxylase carboxyl transferase subunit beta [EC:6.4.1.2 2.1.3.15]                                                                | 5.7326 | 0.0569 | 0.1082 | 0.4799 | 0.0306 | M<N<MS |
| K01966: pccB; propionyl-CoA carboxylase beta chain [EC:6.4.1.3 2.1.3.15]                                                                                    | 2.3334 | 0.3114 | 0.1532 | 0.1921 | 0.3890 | MS<M<N |
| K02160: accB, bccP; acetyl-CoA carboxylase biotin carboxyl carrier protein                                                                                  | 6.5491 | 0.0378 | 0.4426 | 0.1026 | 0.0242 | M<N<MS |
| K03417: prpB; methylisocitrate lyase [EC:4.1.3.30]                                                                                                          | 2.4761 | 0.2900 | 0.2007 | 0.1066 | 0.4401 | N<MS<M |
| K05606: epi; methylmalonyl-CoA/ethylmalonyl-CoA epimerase [EC:5.1.99.1]                                                                                     | 2.7528 | 0.2525 | 0.2948 | 0.2408 | 0.1639 | MS<M<N |
| K07250: gabT; 4-aminobutyrate aminotransferase / (S)-3-amino-2-methylpropionate transaminase / 5-aminovalerate transaminase [EC:2.6.1.19 2.6.1.22 2.6.1.48] | 1.8292 | 0.4007 | 0.2680 | 0.3249 | 0.2915 | N<M<MS |
| K08325: yqhD; NADP-dependent alcohol dehydrogenase [EC:1.1.-.-]                                                                                             | 0.5442 | 0.7618 | 0.6945 | 0.4021 | 0.4128 | M<N<MS |
| K09788: prpF; 2-methylaconitate isomerase [EC:5.3.3.-]                                                                                                      | 0.1141 | 0.9446 | 1.0000 | 0.5813 | 0.4616 | N=M=MS |
| K11263: bccA, pccA; acetyl-CoA/propionyl-CoA carboxylase biotin carboxylase biotin carboxyl carrier protein [EC:6.4.1.2 6.4.1.3 6.3.4.14]                   | 3.1899 | 0.2029 | 0.2199 | 0.1272 | 0.1804 | N<M<MS |
| K11264: scpB, mmcD; methylmalonyl-CoA decarboxylase [EC:4.1.1.-]                                                                                            | 5.4568 | 0.0653 | 0.0608 | 0.1860 | 0.0495 | MS=N<M |
| K11381: bkdA; 2-oxoisovalerate dehydrogenase E1 component [EC:1.2.4.4]                                                                                      | 0.5671 | 0.7531 | 0.3434 | 0.7141 | 0.5025 | N=M=MS |
| K13788: pta; phosphate acetyltransferase [EC:2.3.1.8]                                                                                                       | 3.0874 | 0.2136 | 0.2831 | 0.2054 | 0.1449 | N<M<MS |
| K13919: pduD; propanediol dehydratase medium subunit [EC:4.2.1.28]                                                                                          | 0.8372 | 0.6580 | 0.5449 | 0.3897 | 0.3254 | N=M=MS |
| K13920: pduE; propanediol dehydratase small subunit [EC:4.2.1.28]                                                                                           | 4.3860 | 0.1116 | 0.0662 | 0.1138 | 0.1392 | N=M=MS |
| K13921: pduQ; 1-propanol dehydrogenase                                                                                                                      | 5.4846 | 0.0644 | 0.0382 | 0.0965 | 0.0955 | N=M=MS |
| K13922: pduP; propionaldehyde dehydrogenase [EC:1.2.1.87]                                                                                                   | 0.0016 | 0.9992 | 1.0000 | 0.7296 | 0.4956 | N=M=MS |
| K13923: pduL; phosphate propanoyltransferase [EC:2.3.1.222]                                                                                                 | 3.7934 | 0.1501 | 0.0819 | 0.0675 | 0.3201 | N=M=MS |
| K15024: putative phosphotransacetylase [EC:2.3.1.8]                                                                                                         | 0.8426 | 0.6562 | 0.3119 | 0.5779 | 0.4520 | N=M=MS |
| K18369: adh2; alcohol dehydrogenase [EC:1.1.1.-]                                                                                                            | 0.5596 | 0.7559 | 0.3928 | 0.6870 | 0.4566 | M<N<MS |
| K18471: ydjG; methylglyoxal reductase [EC:1.1.1.-]                                                                                                          | 5.1935 | 0.0745 | 0.0485 | 0.2728 | 0.0761 | M<MS<N |

| Gene family                                                                                                                              | 25-36 months        |                |                                                |                   |                 |            |
|------------------------------------------------------------------------------------------------------------------------------------------|---------------------|----------------|------------------------------------------------|-------------------|-----------------|------------|
|                                                                                                                                          | Kruskal-Wallis test |                | Adjusted <i>P</i> value (Dunn's Post-hoc test) |                   |                 | Enrichment |
|                                                                                                                                          | R-squared           | <i>P</i> value | Non-AD vs. Mild                                | Non-AD vs. Severe | Mild vs. Severe |            |
| K00005: gidA; glycerol dehydrogenase [EC:1.1.1.6]                                                                                        | 0.0547              | 0.9730         | 0.4801                                         | 1.0000            | 0.6816          | N<MS<M     |
| K00016: ldh; L-lactate dehydrogenase [EC:1.1.1.27]                                                                                       | 2.0658              | 0.3560         | 0.2026                                         | 0.2717            | 0.2262          | MS<M<N     |
| K00048: fucO; lactaldehyde reductase [EC:1.1.1.77]                                                                                       | 0.2004              | 0.9047         | 0.4448                                         | 0.5304            | 1.0000          | M<N<MS     |
| K00086: dhaT; 1 3-propanediol dehydrogenase [EC:1.1.1.202]                                                                               | 1.5432              | 0.4623         | 0.3068                                         | 0.4010            | 0.5000          | N=M=MS     |
| K00140: mmsA, iolA; malonate-semialdehyde dehydrogenase (acetylation) / methylmalonate-semialdehyde dehydrogenase [EC:1.2.1.18 1.2.1.27] | 0.6749              | 0.7136         | 0.7610                                         | 0.3920            | 0.4313          | N=M=MS     |
| K00166: bkdA1; 2-oxoisovalerate dehydrogenase E1 component alpha subunit [EC:1.2.4.4]                                                    | 2.2231              | 0.3291         | 0.4984                                         | 0.2248            | 0.2403          | N=M=MS     |
| K00167: bkdA2; 2-oxoisovalerate dehydrogenase E1 component beta subunit [EC:1.2.4.4]                                                     | 0.3454              | 0.8414         | 0.5148                                         | 0.3786            | 0.8373          | N=M=MS     |
| K00169: porA; pyruvate ferredoxin oxidoreductase alpha subunit [EC:1.2.7.1]                                                              | 8.0314              | 0.0180         | 0.4363                                         | 0.0083            | 0.0588          | MS<N<M     |
| K00170: porB; pyruvate ferredoxin oxidoreductase beta subunit [EC:1.2.7.1]                                                               | 12.5514             | 0.0019         | 0.0131                                         | 0.0268            | 0.0006          | MS<N<M     |
| K00171: porD; pyruvate ferredoxin oxidoreductase delta subunit [EC:1.2.7.1]                                                              | 5.8089              | 0.0548         | 0.3515                                         | 0.0247            | 0.1461          | MS<M<N     |
| K00172: porC porG; pyruvate ferredoxin oxidoreductase gamma subunit [EC:1.2.7.1]                                                         | 5.0826              | 0.0788         | 0.2447                                         | 0.0365            | 0.2723          | MS<N<M     |
| K00248: bcd; butyryl-CoA dehydrogenase [EC:1.3.8.1]                                                                                      | 0.0064              | 0.9968         | 0.7205                                         | 0.4806            | 1.0000          | M<MS<N     |
| K00382: lpd, pdhD; dihydrolipoamide dehydrogenase [EC:1.8.1.4]                                                                           | 2.3186              | 0.3137         | 0.1162                                         | 0.4364            | 0.2316          | M<N<MS     |
| K00625: pta; phosphate acetyltransferase [EC:2.3.1.8]                                                                                    | 0.4481              | 0.7993         | 0.3522                                         | 0.4973            | 0.7736          | M<N<MS     |
| K00626: atoB; acetyl-CoA C-acetyltransferase [EC:2.3.1.9]                                                                                | 0.6641              | 0.7174         | 0.4708                                         | 0.6328            | 0.4710          | M<N<MS     |
| K00656: pfID; formate C-acetyltransferase [EC:2.3.1.54]                                                                                  | 5.0451              | 0.0803         | 0.0852                                         | 0.0759            | 0.2634          | N<MS<M     |

|                                                                                                                                                                   |         |        |        |        |        |        |
|-------------------------------------------------------------------------------------------------------------------------------------------------------------------|---------|--------|--------|--------|--------|--------|
| K00823: puuE; 4-aminobutyrate aminotransferase [EC:2.6.1.19]                                                                                                      | 3.6971  | 0.1575 | 0.1319 | 0.1654 | 0.0912 | MS<N<M |
| K00925: ackA; acetate kinase [EC:2.7.2.1]                                                                                                                         | 0.0405  | 0.9799 | 1.0000 | 0.6570 | 0.4828 | N<MS<M |
| K00932: tdcD; propionate kinase [EC:2.7.2.15]                                                                                                                     | 1.1674  | 0.5578 | 0.4985 | 0.3582 | 0.3418 | N=M=MS |
| K01026: pct; propionate CoA-transferase [EC:2.8.3.1]                                                                                                              | 4.1393  | 0.1262 | 0.1441 | 0.1202 | 0.0663 | MS<N<M |
| K01034: atoD; acetate CoA/acetoacetate CoA-transferase alpha subunit [EC:2.8.3.8 2.8.3.9]                                                                         | 0.5670  | 0.7532 | 0.3672 | 0.4555 | 0.7117 | MS<N<M |
| K01035: atoA; acetate CoA/acetoacetate CoA-transferase beta subunit [EC:2.8.3.8 2.8.3.9]                                                                          | 5.1569  | 0.0759 | 0.3534 | 0.0356 | 0.1705 | MS<M<N |
| K01659: prpC; 2-methylcitrate synthase [EC:2.3.3.5]                                                                                                               | 0.2031  | 0.9034 | 0.6126 | 0.9973 | 0.4666 | M<MS<N |
| K01682: acnB; aconitate hydratase 2 / 2-methylisocitrate dehydratase [EC:4.2.1.3 4.2.1.99]                                                                        | 2.1050  | 0.3491 | 0.2259 | 0.4293 | 0.1710 | N=M=MS |
| K01692: paaF, echA; enoyl-CoA hydratase [EC:4.2.1.17]                                                                                                             | 1.3849  | 0.5003 | 0.4134 | 0.3590 | 0.3015 | N=M=MS |
| K01699: pduC; propanediol dehydratase large subunit [EC:4.2.1.28]                                                                                                 | 1.0321  | 0.5969 | 0.4850 | 0.4827 | 0.3885 | N=M=MS |
| K01720: prpD; 2-methylcitrate dehydratase [EC:4.2.1.79]                                                                                                           | 0.1904  | 0.9092 | 1.0000 | 0.5499 | 0.4642 | M<MS<N |
| K01734: mgsA; methylglyoxal synthase [EC:4.2.3.3]                                                                                                                 | 3.7271  | 0.1551 | 0.1324 | 0.1622 | 0.0901 | M<N<MS |
| K01782: fadJ; 3-hydroxyacyl-CoA dehydrogenase / enoyl-CoA hydratase / 3-hydroxybutyryl-CoA epimerase [EC:1.1.1.35 4.2.1.17 5.1.2.3]                               | 1.1957  | 0.5500 | 0.3713 | 0.4751 | 0.4769 | N=M=MS |
| K01825: fadB; 3-hydroxyacyl-CoA dehydrogenase / enoyl-CoA hydratase / 3-hydroxybutyryl-CoA epimerase / enoyl-CoA isomerase [EC:1.1.1.35 4.2.1.17 5.1.2.3 5.3.3.8] | 0.5438  | 0.7619 | 0.3383 | 0.4731 | 0.7112 | N=M=MS |
| K01847: MUT; methylmalonyl-CoA mutase [EC:5.4.99.2]                                                                                                               | 0.9309  | 0.6278 | 0.4470 | 0.5073 | 0.4443 | M<N<MS |
| K01848: mcmA1; methylmalonyl-CoA mutase N-terminal domain [EC:5.4.99.2]                                                                                           | 3.5059  | 0.1733 | 0.1871 | 0.1293 | 0.1178 | M<N<MS |
| K01849: mcmA2; methylmalonyl-CoA mutase C-terminal domain [EC:5.4.99.2]                                                                                           | 8.0588  | 0.0178 | 0.4659 | 0.0098 | 0.0384 | M<N<MS |
| K01895: acs; acetyl-CoA synthetase [EC:6.2.1.1]                                                                                                                   | 1.7582  | 0.4152 | 0.3322 | 0.2037 | 0.3710 | MS<M<N |
| K01902: sucD; succinyl-CoA synthetase alpha subunit [EC:6.2.1.5]                                                                                                  | 0.5446  | 0.7616 | 0.4451 | 0.6925 | 0.5287 | MS<M<N |
| K01903: sucC; succinyl-CoA synthetase beta subunit [EC:6.2.1.5]                                                                                                   | 4.8478  | 0.0886 | 0.3483 | 0.0423 | 0.1880 | MS<M<N |
| K01905: acdA; acetate---CoA ligase (ADP-forming) subunit alpha [EC:6.2.1.13]                                                                                      | 3.8014  | 0.1495 | 0.0966 | 0.2127 | 0.1657 | N=M=MS |
| K01908: prpE; propionyl-CoA synthetase [EC:6.2.1.17]                                                                                                              | 1.9751  | 0.3725 | 0.2128 | 0.2733 | 0.2400 | N=M=MS |
| K01961: accC; acetyl-CoA carboxylase biotin carboxylase subunit [EC:6.4.1.2 6.3.4.14]                                                                             | 2.5129  | 0.2847 | 0.1707 | 0.3822 | 0.1571 | M<N<MS |
| K01962: accA; acetyl-CoA carboxylase carboxyl transferase subunit alpha [EC:6.4.1.2 2.1.3.15]                                                                     | 0.0761  | 0.9627 | 0.4970 | 1.0000 | 0.6443 | N<M<MS |
| K01963: accD; acetyl-CoA carboxylase carboxyl transferase subunit beta [EC:6.4.1.2 2.1.3.15]                                                                      | 0.1019  | 0.9503 | 0.4797 | 1.0000 | 0.6479 | M<N<MS |
| K01966: pccB; propionyl-CoA carboxylase beta chain [EC:6.4.1.3 2.1.3.15]                                                                                          | 10.5526 | 0.0051 | 0.0271 | 0.0050 | 0.4667 | MS<M<N |
| K02160: accB, bccP; acetyl-CoA carboxylase biotin carboxyl carrier protein                                                                                        | 1.5003  | 0.4723 | 0.3210 | 0.2423 | 0.3378 | MS<N<M |
| K03417: prpB; methylisocitrate lyase [EC:4.1.3.30]                                                                                                                | 0.3481  | 0.8403 | 0.4232 | 0.8345 | 0.6162 | MS<M<N |
| K05606: epi; methylmalonyl-CoA/ethylmalonyl-CoA epimerase [EC:5.1.99.1]                                                                                           | 3.5188  | 0.1722 | 0.0977 | 0.2104 | 0.1875 | M<MS<N |
| K07250: gabT; 4-aminobutyrate aminotransferase / (S)-3-amino-2-methylpropionate transaminase / 5-aminovalerate transaminase [EC:2.6.1.19 2.6.1.22 2.6.1.48]       | 0.4739  | 0.7890 | 0.7809 | 0.5146 | 0.3761 | M<N<MS |
| K08325: yqhD; NADP-dependent alcohol dehydrogenase [EC:1.1.-.-]                                                                                                   | 2.6625  | 0.2642 | 0.1619 | 0.4433 | 0.1240 | M<N<MS |
| K09788: prpF; 2-methylaconitate isomerase [EC:5.3.3.-]                                                                                                            | 2.0562  | 0.3577 | 0.3939 | 0.2945 | 0.1916 | N=M=MS |
| K11263: bccA, pccA; acetyl-CoA/propionyl-CoA carboxylase biotin carboxylase biotin carboxyl carrier protein [EC:6.4.1.2 6.4.1.3 6.3.4.14]                         | 2.9798  | 0.2254 | 0.1625 | 0.1983 | 0.1270 | MS<N<M |
| K11264: scpB, mmcD; methylmalonyl-CoA decarboxylase [EC:4.1.1.-]                                                                                                  | 0.9367  | 0.6260 | 0.4277 | 0.5495 | 0.4615 | MS=M<N |
| K11381: bkdA; 2-oxoisovalerate dehydrogenase E1 component [EC:1.2.4.4]                                                                                            | 3.7984  | 0.1497 | 0.2589 | 0.0881 | 0.3345 | N=M=MS |
| K13788: pta; phosphate acetyltransferase [EC:2.3.1.8]                                                                                                             | 4.5538  | 0.1026 | 0.0570 | 0.1553 | 0.1668 | N<MS<M |
| K13919: pduD; propanediol dehydratase medium subunit [EC:4.2.1.28]                                                                                                | 2.2671  | 0.3219 | 0.2455 | 0.1967 | 0.2036 | N=M=MS |
| K13920: pduE; propanediol dehydratase small subunit [EC:4.2.1.28]                                                                                                 | 0.6294  | 0.7300 | 0.4302 | 0.6418 | 0.5264 | N=M=MS |
| K13921: pduQ; 1-propanol dehydrogenase                                                                                                                            | 3.5443  | 0.1700 | 0.2145 | 0.1108 | 0.1264 | N=M=MS |
| K13922: pduP; propionaldehyde dehydrogenase [EC:1.2.1.87]                                                                                                         | 0.2917  | 0.8643 | 0.4669 | 0.8868 | 0.5774 | N=M=MS |
| K13923: pduL; phosphate propanoyltransferase [EC:2.3.1.222]                                                                                                       | 5.7657  | 0.0560 | 0.0209 | 0.3569 | 0.0355 | N=M=MS |
| K15024: putative phosphotransacetylase [EC:2.3.1.8]                                                                                                               | 0.4303  | 0.8064 | 0.4331 | 0.7677 | 0.5758 | N=M=MS |
| K18369: adh2; alcohol dehydrogenase [EC:1.1.1.-]                                                                                                                  | 2.9123  | 0.2331 | 0.1748 | 0.2201 | 0.2333 | N<MS<M |
| K18471: ydjG; methylglyoxal reductase [EC:1.1.1.-]                                                                                                                | 1.5466  | 0.4615 | 0.3185 | 0.2369 | 0.3279 | M<N<MS |

| Gene family                                                                                                                                                       | MaAsLin2 analysis |                 |                               |
|-------------------------------------------------------------------------------------------------------------------------------------------------------------------|-------------------|-----------------|-------------------------------|
|                                                                                                                                                                   | Time point        | q value         |                               |
|                                                                                                                                                                   |                   | Non-AD vs. Mild | Non-AD vs. Moderate to Severe |
| K00005: gldA; glycerol dehydrogenase [EC:1.1.1.6]                                                                                                                 | N.S.*             | N.S.            | N.S.                          |
| K00016: ldh; L-lactate dehydrogenase [EC:1.1.1.27]                                                                                                                | N.S.              | N.S.            | N.S.                          |
| K00048: fucO; lactaldehyde reductase [EC:1.1.1.77]                                                                                                                | N.S.              | N.S.            | N.S.                          |
| K00086: dhaT; 1 3-propanediol dehydrogenase [EC:1.1.1.202]                                                                                                        | N.S.              | N.S.            | N.S.                          |
| K00140: mmsA, iolA; malonate-semialdehyde dehydrogenase (acetylating) / methylmalonate-semialdehyde dehydrogenase [EC:1.2.1.18 1.2.1.27]                          | N.S.              | N.S.            | N.S.                          |
| K00166: bkdA1; 2-oxoisovalerate dehydrogenase E1 component alpha subunit [EC:1.2.4.4]                                                                             | N.S.              | N.S.            | N.S.                          |
| K00167: bkdA2; 2-oxoisovalerate dehydrogenase E1 component beta subunit [EC:1.2.4.4]                                                                              | N.S.              | N.S.            | N.S.                          |
| K00169: porA; pyruvate ferredoxin oxidoreductase alpha subunit [EC:1.2.7.1]                                                                                       | 25-36 months      | N.S.            | 0.1449                        |
| K00170: porB; pyruvate ferredoxin oxidoreductase beta subunit [EC:1.2.7.1]                                                                                        | 25-36 months      | 0.1288          | N.S.                          |
| K00171: porD; pyruvate ferredoxin oxidoreductase delta subunit [EC:1.2.7.1]                                                                                       | N.S.              | N.S.            | N.S.                          |
| K00172: porC porG; pyruvate ferredoxin oxidoreductase gamma subunit [EC:1.2.7.1]                                                                                  | N.S.              | N.S.            | N.S.                          |
| K00248: bcd; butyryl-CoA dehydrogenase [EC:1.3.8.1]                                                                                                               | N.S.              | N.S.            | N.S.                          |
| K00382: lpd, pdhD; dihydrolipoamide dehydrogenase [EC:1.8.1.4]                                                                                                    | N.S.              | N.S.            | N.S.                          |
| K00625: pta; phosphate acetyltransferase [EC:2.3.1.8]                                                                                                             | N.S.              | N.S.            | N.S.                          |
| K00626: atoB; acetyl-CoA C-acetyltransferase [EC:2.3.1.9]                                                                                                         | N.S.              | N.S.            | N.S.                          |
| K00656: pflD; formate C-acetyltransferase [EC:2.3.1.54]                                                                                                           | N.S.              | N.S.            | N.S.                          |
| K00823: puuE; 4-aminobutyrate aminotransferase [EC:2.6.1.19]                                                                                                      | N.S.              | N.S.            | N.S.                          |
| K00925: ackA; acetate kinase [EC:2.7.2.1]                                                                                                                         | N.S.              | N.S.            | N.S.                          |
| K00932: tdcD; propionate kinase [EC:2.7.2.15]                                                                                                                     | N.S.              | N.S.            | N.S.                          |
| K01026: pct; propionate CoA-transferase [EC:2.8.3.1]                                                                                                              | N.S.              | N.S.            | N.S.                          |
| K01034: atoD; acetate CoA/acetoacetate CoA-transferase alpha subunit [EC:2.8.3.8 2.8.3.9]                                                                         | N.S.              | N.S.            | N.S.                          |
| K01035: atoA; acetate CoA/acetoacetate CoA-transferase beta subunit [EC:2.8.3.8 2.8.3.9]                                                                          | N.S.              | N.S.            | N.S.                          |
| K01659: prpC; 2-methylcitrate synthase [EC:2.3.3.5]                                                                                                               | N.S.              | N.S.            | N.S.                          |
| K01682: acnB; aconitate hydratase 2 / 2-methylisocitrate dehydratase [EC:4.2.1.3 4.2.1.99]                                                                        | N.S.              | N.S.            | N.S.                          |
| K01692: paaF, echA; enoyl-CoA hydratase [EC:4.2.1.17]                                                                                                             | N.S.              | N.S.            | N.S.                          |
| K01699: pduC; propanediol dehydratase large subunit [EC:4.2.1.28]                                                                                                 | N.S.              | N.S.            | N.S.                          |
| K01720: prpD; 2-methylcitrate dehydratase [EC:4.2.1.79]                                                                                                           | N.S.              | N.S.            | N.S.                          |
| K01734: mgsA; methylglyoxal synthase [EC:4.2.3.3]                                                                                                                 | N.S.              | N.S.            | N.S.                          |
| K01782: fadJ; 3-hydroxyacyl-CoA dehydrogenase / enoyl-CoA hydratase / 3-hydroxybutyryl-CoA epimerase [EC:1.1.1.35 4.2.1.17 5.1.2.3]                               | N.S.              | N.S.            | N.S.                          |
| K01825: fadB; 3-hydroxyacyl-CoA dehydrogenase / enoyl-CoA hydratase / 3-hydroxybutyryl-CoA epimerase / enoyl-CoA isomerase [EC:1.1.1.35 4.2.1.17 5.1.2.3 5.3.3.8] | N.S.              | N.S.            | N.S.                          |
| K01847: MUT; methylmalonyl-CoA mutase [EC:5.4.99.2]                                                                                                               | 13-24 months      | N.S.            | 0.0293                        |
| K01848: mcmA1; methylmalonyl-CoA mutase N-terminal domain [EC:5.4.99.2]                                                                                           | N.S.              | N.S.            | N.S.                          |
| K01849: mcmA2; methylmalonyl-CoA mutase C-terminal domain [EC:5.4.99.2]                                                                                           | N.S.              | N.S.            | N.S.                          |
| K01895: acs; acetyl-CoA synthetase [EC:6.2.1.1]                                                                                                                   | N.S.              | N.S.            | N.S.                          |
| K01902: sucD; succinyl-CoA synthetase alpha subunit [EC:6.2.1.5]                                                                                                  | N.S.              | N.S.            | N.S.                          |
| K01903: sucC; succinyl-CoA synthetase beta subunit [EC:6.2.1.5]                                                                                                   | N.S.              | N.S.            | N.S.                          |
| K01905: acdA; acetate---CoA ligase (ADP-forming) subunit alpha [EC:6.2.1.13]                                                                                      | N.S.              | N.S.            | N.S.                          |
| K01908: prpE; propionyl-CoA synthetase [EC:6.2.1.17]                                                                                                              | N.S.              | N.S.            | N.S.                          |
| K01961: accC; acetyl-CoA carboxylase biotin carboxylase subunit [EC:6.4.1.2 6.3.4.14]                                                                             | N.S.              | N.S.            | N.S.                          |



|                                                                                                                                                             |              |      |        |
|-------------------------------------------------------------------------------------------------------------------------------------------------------------|--------------|------|--------|
| K01962: accA; acetyl-CoA carboxylase carboxyl transferase subunit alpha [EC:6.4.1.2 2.1.3.15]                                                               | N.S.         | N.S. | N.S.   |
| K01963: accD; acetyl-CoA carboxylase carboxyl transferase subunit beta [EC:6.4.1.2 2.1.3.15]                                                                | N.S.         | N.S. | N.S.   |
| K01966: pccB; propionyl-CoA carboxylase beta chain [EC:6.4.1.3 2.1.3.15]                                                                                    | 25-36 months | N.S. | 0.1449 |
| K02160: accB, bccP; acetyl-CoA carboxylase biotin carboxyl carrier protein                                                                                  | N.S.         | N.S. | N.S.   |
| K03417: prpB; methylisocitrate lyase [EC:4.1.3.30]                                                                                                          | N.S.         | N.S. | N.S.   |
| K05606: epi; methylmalonyl-CoA/ethylmalonyl-CoA epimerase [EC:5.1.99.1]                                                                                     | N.S.         | N.S. | N.S.   |
| K07250: gabT; 4-aminobutyrate aminotransferase / (S)-3-amino-2-methylpropionate transaminase / 5-aminovalerate transaminase [EC:2.6.1.19 2.6.1.22 2.6.1.48] | N.S.         | N.S. | N.S.   |
| K08325: yqhD; NADP-dependent alcohol dehydrogenase [EC:1.1.-.-]                                                                                             | N.S.         | N.S. | N.S.   |
| K09788: prpF; 2-methylaconitate isomerase [EC:5.3.3.-]                                                                                                      | N.S.         | N.S. | N.S.   |
| K11263: bccA, pccA; acetyl-CoA/propionyl-CoA carboxylase biotin carboxylase biotin carboxyl carrier protein [EC:6.4.1.2 6.4.1.3 6.3.4.14]                   | N.S.         | N.S. | N.S.   |
| K11264: scpB, mmcD; methylmalonyl-CoA decarboxylase [EC:4.1.1.-]                                                                                            | N.S.         | N.S. | N.S.   |
| K11381: bkdA; 2-oxoisovalerate dehydrogenase E1 component [EC:1.2.4.4]                                                                                      | N.S.         | N.S. | N.S.   |
| K13788: pta; phosphate acetyltransferase [EC:2.3.1.8]                                                                                                       | N.S.         | N.S. | N.S.   |
| K13919: pduD; propanediol dehydratase medium subunit [EC:4.2.1.28]                                                                                          | N.S.         | N.S. | N.S.   |
| K13920: pduE; propanediol dehydratase small subunit [EC:4.2.1.28]                                                                                           | N.S.         | N.S. | N.S.   |
| K13921: pduQ; 1-propanol dehydrogenase                                                                                                                      | N.S.         | N.S. | N.S.   |
| K13922: pduP; propionaldehyde dehydrogenase [EC:1.2.1.87]                                                                                                   | N.S.         | N.S. | N.S.   |
| K13923: pduL; phosphate propanoyltransferase [EC:2.3.1.222]                                                                                                 | N.S.         | N.S. | N.S.   |
| K15024: putative phosphotransacetylase [EC:2.3.1.8]                                                                                                         | N.S.         | N.S. | N.S.   |
| K18369: adh2; alcohol dehydrogenase [EC:1.1.1.-]                                                                                                            | N.S.         | N.S. | N.S.   |
| K18471: ydJG; methylglyoxal reductase [EC:1.1.1.-]                                                                                                          | N.S.         | N.S. | N.S.   |

\*N.S., Not significant

**Table S11.** Comparison of the shifted KEGG Orthology (KO) according to age among phenotypic groups. Significantly changed categories according to age were selected using MaAsLin2 ( $q < 0.05$ ) and the random forest model (the lowest cross-validation error). KO features of the gut microbiome at 6 months were used as a reference for MaAsLin2 analysis. Kruskal–Wallis and Dunn’s post-hoc tests were performed to calculate the significant differences between groups. *P*-value was adjusted using the Benjamini–Hochberg method. N: Non-AD, M: Mild AD, MS: Moderate to Severe AD.

| KEGG Orthology                                                  | MaAsLin2 analysis |             |     |         |                |                |
|-----------------------------------------------------------------|-------------------|-------------|-----|---------|----------------|----------------|
|                                                                 | Time point        | Coefficient | N   | N not 0 | <i>P</i> value | <i>q</i> value |
| ko00140: Steroid hormone biosynthesis                           | 25-36 months      | 0.00148     | 112 | 72      | 2.93E-14       | 5.70E-12       |
| ko00998: Biosynthesis of various secondary metabolites - part 2 | 25-36 months      | 0.00282     | 112 | 107     | 4.43E-14       | 7.47E-12       |
| ko00625: Chloroalkane and chloroalkene degradation              | 25-36 months      | -0.00141    | 112 | 112     | 1.93E-14       | 4.07E-12       |
| ko04919: Thyroid hormone signaling pathway                      | 25-36 months      | 0.00237     | 112 | 112     | 2.78E-20       | 7.03E-17       |
| ko99975: Protein processing                                     | 25-36 months      | -0.00097    | 112 | 112     | 6.88E-20       | 7.90E-17       |
| ko03013: RNA transport                                          | 25-36 months      | 0.00141     | 112 | 112     | 1.07E-14       | 2.45E-12       |
| ko00121: Secondary bile acid biosynthesis                       | 25-36 months      | 0.00151     | 112 | 112     | 6.32E-15       | 1.60E-12       |
| ko04152: AMPK signaling pathway                                 | 25-36 months      | 0.00210     | 112 | 112     | 1.20E-19       | 7.90E-17       |
| ko00525: Acarbose and validamycin biosynthesis                  | 25-36 months      | 0.00154     | 112 | 112     | 3.16E-17       | 1.33E-14       |
| ko00430: Taurine and hypotaurine metabolism                     | 25-36 months      | 0.00043     | 112 | 112     | 1.71E-09       | 7.00E-08       |
| ko00523: Polyketide sugar unit biosynthesis                     | 25-36 months      | 0.00190     | 112 | 112     | 1.25E-19       | 7.90E-17       |
| ko99993: Cell motility                                          | 25-36 months      | -0.00251    | 112 | 100     | 7.43E-17       | 2.68E-14       |
| ko01051: Biosynthesis of ansamycins                             | 25-36 months      | 0.00215     | 112 | 112     | 5.04E-19       | 2.55E-16       |
| ko99999: Others - unclassified metabolism                       | 25-36 months      | -0.00133    | 112 | 112     | 1.54E-11       | 1.25E-09       |
| ko04011: MAPK signaling pathway - yeast                         | 25-36 months      | 0.00074     | 112 | 104     | 1.13E-04       | 1.44E-03       |
| ko99973: Transcription                                          | 25-36 months      | -0.00190    | 112 | 112     | 2.37E-13       | 2.60E-11       |
| ko00460: Cyanoamino acid metabolism                             | 25-36 months      | 0.00068     | 112 | 112     | 4.15E-10       | 2.10E-08       |
| ko00053: Ascorbate and aldarate metabolism                      | 25-36 months      | -0.00097    | 112 | 112     | 1.46E-09       | 6.59E-08       |
| ko00120: Primary bile acid biosynthesis                         | 25-36 months      | 0.00177     | 112 | 111     | 3.93E-12       | 3.82E-10       |

  

| KEGG Orthology                                                  | 6 months            |                |                                                |                               |                             |            | 7-12 months         |                |                                                |                               |                             |            |
|-----------------------------------------------------------------|---------------------|----------------|------------------------------------------------|-------------------------------|-----------------------------|------------|---------------------|----------------|------------------------------------------------|-------------------------------|-----------------------------|------------|
|                                                                 | Kruskal-Wallis test |                | Adjusted <i>P</i> value (Dunn's Post-hoc test) |                               |                             |            | Kruskal-Wallis test |                | Adjusted <i>P</i> value (Dunn's Post-hoc test) |                               |                             |            |
|                                                                 | R-squared           | <i>P</i> value | Non-AD vs. Mild                                | Non-AD vs. Moderate to Severe | Mild vs. Moderate to Severe | Enrichment | R-squared           | <i>P</i> value | Non-AD vs. Mild                                | Non-AD vs. Moderate to Severe | Mild vs. Moderate to Severe | Enrichment |
| ko00140: Steroid hormone biosynthesis                           | 2.9024              | 0.2343         | 0.1598                                         | 0.2112                        | 0.1486                      | N=M=MS     | 3.2847              | 0.1935         | 0.4479                                         | 0.1411                        | 0.1416                      | N=M<MS     |
| ko00998: Biosynthesis of various secondary metabolites - part 2 | 8.0073              | 0.0182         | 0.0928                                         | 0.0285                        | 0.0072                      | MS<N<M     | 0.0919              | 0.9551         | 0.4635                                         | 0.6740                        | 1.0000                      | N<M<MS     |
| ko00625: Chloroalkane and chloroalkene degradation              | 1.5600              | 0.4584         | 0.2627                                         | 0.2877                        | 0.3446                      | M<MS<N     | 1.5450              | 0.4619         | 0.2857                                         | 0.3664                        | 0.2884                      | MS<M<N     |
| ko04919: Thyroid hormone signaling pathway                      | 5.3969              | 0.0673         | 0.4655                                         | 0.0396                        | 0.0337                      | MS<N<M     | 0.4767              | 0.7879         | 0.7585                                         | 0.3566                        | 0.5251                      | M<MS<N     |
| ko99975: Protein processing                                     | 3.0914              | 0.2132         | 0.2794                                         | 0.1100                        | 0.1301                      | M<N<MS     | 0.7792              | 0.6773         | 0.3288                                         | 0.5870                        | 0.4384                      | MS<M<N     |
| ko03013: RNA transport                                          | 2.7911              | 0.2477         | 0.1864                                         | 0.1922                        | 0.1519                      | MS<N<M     | 1.7835              | 0.4099         | 0.2485                                         | 0.4606                        | 0.3586                      | M<N<MS     |
| ko00121: Secondary bile acid biosynthesis                       | 2.3812              | 0.3040         | 0.2420                                         | 0.1869                        | 0.1889                      | N<MS<M     | 1.2178              | 0.5440         | 0.2354                                         | 0.4422                        | 0.4570                      | M<MS<N     |
| ko04152: AMPK signaling pathway                                 | 5.1534              | 0.0760         | 0.3828                                         | 0.0539                        | 0.0296                      | MS<N<M     | 1.1360              | 0.5667         | 0.5144                                         | 0.3550                        | 0.3344                      | M<MS<N     |
| ko00525: Acarbose and validamycin biosynthesis                  | 6.0703              | 0.0581         | 0.4891                                         | 0.0264                        | 0.0273                      | MS<M<N     | 0.8742              | 0.6459         | 0.3787                                         | 0.5252                        | 0.3410                      | MS<M<N     |
| ko00430: Taurine and hypotaurine metabolism                     | 3.3652              | 0.1859         | 0.3624                                         | 0.1008                        | 0.1377                      | MS<M<N     | 2.0675              | 0.3557         | 0.3885                                         | 0.1845                        | 0.3187                      | MS<N<M     |
| ko00523: Polyketide sugar unit biosynthesis                     | 7.3509              | 0.0253         | 0.2883                                         | 0.0102                        | 0.0394                      | M<MS<N     | 1.1405              | 0.5654         | 0.2697                                         | 0.4456                        | 0.3946                      | MS<M<N     |

|                                                                 |                     |                |                                                |                               |                             |           |                     |                     |                 |                                                |                             |        |
|-----------------------------------------------------------------|---------------------|----------------|------------------------------------------------|-------------------------------|-----------------------------|-----------|---------------------|---------------------|-----------------|------------------------------------------------|-----------------------------|--------|
| ko99993: Cell motility                                          | 0.9650              | 0.6172         | 0.4414                                         | 0.5518                        | 0.2767                      | MS<N<M    | 5.3575              | 0.0686              | 0.4554          | 0.0754                                         | 0.0465                      | M<N<MS |
| ko01051: Biosynthesis of ansamycins                             | 8.7967              | 0.0123         | 0.1987                                         | 0.0086                        | 0.0065                      | N<MS<M    | 0.4682              | 0.7913              | 0.4890          | 0.4944                                         | 0.7667                      | MS<M<N |
| ko99999: Others - unclassified metabolism                       | 2.4368              | 0.2957         | 0.2053                                         | 0.2136                        | 0.1778                      | M<MS<N    | 0.7922              | 0.6730              | 0.7016          | 0.4251                                         | 0.3543                      | MS<N<M |
| ko04011: MAPK signaling pathway - yeast                         | 1.6230              | 0.4442         | 0.2430                                         | 0.4521                        | 0.4401                      | M<MS<N    | 7.5256              | 0.0232              | 0.0672          | 0.0102                                         | 0.0662                      | N<M<MS |
| ko99973: Transcription                                          | 0.6270              | 0.7309         | 0.3836                                         | 0.3950                        | 0.6544                      | M<MS<N    | 0.0698              | 0.9657              | 0.4410          | 1.0000                                         | 0.6546                      | N<M<MS |
| ko00460: Cyanoamino acid metabolism                             | 3.6285              | 0.1630         | 0.1535                                         | 0.1477                        | 0.0902                      | N<MS<M    | 0.3307              | 0.8476              | 0.8532          | 0.5345                                         | 0.3996                      | M<MS<N |
| ko00053: Ascorbate and aldarate metabolism                      | 0.2675              | 0.8748         | 0.3849                                         | 0.5524                        | 0.9078                      | M<N<MS    | 2.2380              | 0.3266              | 0.2438          | 0.2394                                         | 0.2251                      | MS<M<N |
| ko00120: Primary bile acid biosynthesis                         | 2.9744              | 0.2260         | 0.1937                                         | 0.1671                        | 0.1273                      | N<MS<M    | 0.8687              | 0.6477              | 0.3477          | 0.5850                                         | 0.3735                      | M<MS<N |
| KEGG Orthology                                                  | 13-24 months months |                |                                                |                               |                             |           | 25-36 months months |                     |                 |                                                |                             |        |
|                                                                 | Kruskal-Wallis test |                | Adjusted <i>P</i> value (Dunn's Post-hoc test) |                               |                             |           | Enrichment          | Kruskal-Wallis test |                 | Adjusted <i>P</i> value (Dunn's Post-hoc test) |                             |        |
|                                                                 | R-squared           | <i>P</i> value | Non-AD vs. Mild                                | Non-AD vs. Moderate to Severe | Mild vs. Moderate to Severe | R-squared |                     | <i>P</i> value      | Non-AD vs. Mild | Non-AD vs. Moderate to Severe                  | Mild vs. Moderate to Severe |        |
| ko00140: Steroid hormone biosynthesis                           | 3.8452              | 0.1462         | 0.0570                                         | 0.0849                        | 0.4722                      | MS<M<N    | 9.7321              | 0.0077              | 0.0040          | 0.0571                                         | 0.0681                      | M<MS<N |
| ko00998: Biosynthesis of various secondary metabolites - part 2 | 2.7517              | 0.2526         | 0.1534                                         | 0.2051                        | 0.1826                      | M<MS<N    | 9.3562              | 0.0093              | 0.0509          | 0.0283                                         | 0.0049                      | M<N<MS |
| ko00625: Chloroalkane and chloroalkene degradation              | 6.4119              | 0.0405         | 0.0196                                         | 0.0191                        | 0.4066                      | N<M<MS    | 8.4919              | 0.0143              | 0.0101          | 0.1955                                         | 0.0061                      | MS<N<M |
| ko04919: Thyroid hormone signaling pathway                      | 0.1207              | 0.9414         | 1.0000                                         | 0.6205                        | 0.4200                      | MS<M<N    | 0.9381              | 0.6256              | 0.3028          | 0.3822                                         | 0.5283                      | M<N<MS |
| ko99975: Protein processing                                     | 2.4445              | 0.2946         | 0.4663                                         | 0.2225                        | 0.2414                      | N<M<MS    | 4.5853              | 0.1010              | 0.0488          | 0.3318                                         | 0.0703                      | MS<N<M |
| ko03013: RNA transport                                          | 2.5966              | 0.2730         | 0.1827                                         | 0.1776                        | 0.2300                      | M<MS<N    | 2.9191              | 0.2323              | 0.0949          | 0.3646                                         | 0.1485                      | M<N<MS |
| ko00121: Secondary bile acid biosynthesis                       | 0.2862              | 0.8667         | 0.4017                                         | 0.9355                        | 0.5519                      | M<N<MS    | 1.2768              | 0.5281              | 0.4305          | 0.3925                                         | 0.2931                      | MS<N<M |
| ko04152: AMPK signaling pathway                                 | 0.1051              | 0.9488         | 1.0000                                         | 0.4400                        | 0.6102                      | MS<M<N    | 1.0741              | 0.5845              | 0.2934          | 0.3567                                         | 0.4814                      | M<N<MS |
| ko00525: Acarbose and validamycin biosynthesis                  | 0.2042              | 0.9029         | 0.5697                                         | 0.4880                        | 1.0000                      | M<N<MS    | 0.0892              | 0.9564              | 0.6357          | 1.0000                                         | 0.4967                      | M<N<MS |
| ko00430: Taurine and hypotaurine metabolism                     | 0.0447              | 0.9779         | 0.6582                                         | 1.0000                        | 0.4711                      | MS<N<M    | 0.4891              | 0.7831              | 0.7452          | 0.3690                                         | 0.5181                      | M<MS<N |
| ko00523: Polyketide sugar unit biosynthesis                     | 1.2147              | 0.5448         | 0.4330                                         | 0.4361                        | 0.4113                      | M<N<MS    | 0.2324              | 0.8903              | 0.4854          | 0.9735                                         | 0.5466                      | MS<N<M |
| ko99993: Cell motility                                          | 3.3607              | 0.1863         | 0.1318                                         | 0.1810                        | 0.1487                      | N<MS<M    | 0.9228              | 0.6304              | 0.4386          | 0.5710                                         | 0.3420                      | MS<N<M |
| ko01051: Biosynthesis of ansamycins                             | 0.1762              | 0.9156         | 1.0000                                         | 0.5410                        | 0.4534                      | MS<M=N    | 1.0455              | 0.5929              | 0.3234          | 0.3329                                         | 0.5133                      | M<N<MS |
| ko99999: Others - unclassified metabolism                       | 2.4532              | 0.2933         | 0.1929                                         | 0.1162                        | 0.4017                      | N<M<MS    | 0.1666              | 0.9201              | 0.4099          | 0.5910                                         | 1.0000                      | N<M<MS |
| ko04011: MAPK signaling pathway - yeast                         | 2.2049              | 0.3321         | 0.2827                                         | 0.2264                        | 0.2267                      | M<MS<N    | 14.0595             | 0.0009              | 0.0956          | 0.0003                                         | 0.1307                      | MS<M<N |
| ko99973: Transcription                                          | 8.1031              | 0.0174         | 0.0062                                         | 0.0096                        | 0.4777                      | N<M<MS    | 2.3553              | 0.3080              | 0.1570          | 0.2979                                         | 0.1910                      | MS<N<M |
| ko00460: Cyanoamino acid metabolism                             | 0.7000              | 0.7047         | 0.4169                                         | 0.7535                        | 0.3809                      | N<M<MS    | 0.5144              | 0.7732              | 0.5763          | 0.7187                                         | 0.4150                      | MS<N<M |
| ko00053: Ascorbate and aldarate metabolism                      | 3.9628              | 0.1379         | 0.0896                                         | 0.0698                        | 0.2988                      | N<M<MS    | 2.2211              | 0.3294              | 0.3072          | 0.1651                                         | 0.2861                      | MS<N<M |
| ko00120: Primary bile acid biosynthesis                         | 0.2261              | 0.8931         | 0.4940                                         | 0.9741                        | 0.4953                      | M<MS<N    | 2.5176              | 0.2840              | 0.1689          | 0.3446                                         | 0.1752                      | N<MS<M |

**Table S12.** Primer list for gene expression of mice colon.

| Target gene    | Primers         | Sequence (5'-3')         |
|----------------|-----------------|--------------------------|
| <i>β-actin</i> | β-actin_forward | TTCGTTGCCGGTCCACA        |
|                | β-actin_reverse | ACCAGCGCAGCGATATCG       |
| <i>Pparg</i>   | Pparg_forward   | CGGTTTCAGAAGTGCCTTG      |
|                | Pparg_reverse   | GGTTCAGCTGGTCGATATCAC    |
| <i>Gpr109a</i> | Gpr109a_forward | ATGGCGAGGCATATCTGTGTAGCA |
|                | Gpr109a_reverse | TCCTGCCTGAGCAGAACAAGATGA |
| <i>Gpr41</i>   | Gpr41_forward   | GGGGTCGATAACAAGAGT       |
|                | Gpr41_reverse   | CTGGCGGAGCTACGTGCT       |
| <i>Gpr43</i>   | Gpr43_forward   | CCACTGTATGGAGTGATCGCTG   |
|                | Gpr43_reverse   | GGGTGAAGTTCTAGCAGGT      |
| <i>Foxp3</i>   | Foxp3_forward   | TGCGACCCCCTTTCACCT       |
|                | Foxp3_reverse   | AGTGCCTCTGCCTCTCC        |
| <i>Il10</i>    | Il10_forward    | CCTCAGGATGCGGCTGAG       |
|                | Il10_reverse    | GCTCCACTGCCTTGCTCTTATT   |
| <i>Tnfa</i>    | Tnfa_forward    | ACGGCATGGATCTCAAAGAC     |
|                | Tnfa_reverse    | GTGGGTGAGGAGCACGTAGT     |
| <i>Il1b</i>    | Il1b_forward    | GCAACTGTTCTGAACTCAAC     |
|                | Il1b_reverse    | ATCTTTTGGGGTCCGTCAACT    |
| <i>Il6</i>     | Il6_forward     | TAGTCCTTCCTACCCCAATTTCC  |
|                | Il6_reverse     | TTGGTCCTTAGCCACTCCTTC    |
